# Supplementary material
Source: MDPI journal article supplement (https://www.mdpi.com/2073-4395/12/5/1078)
Supplement: s1 [file s1 › Table S1.xlsx]

## Sheet: Table S1
Table S1. The morphological characteristics of different populations of Rosa sericea complex from differen geographical ranges of Southwest China
Species	Locality	Latitude	Longitude	Altitude	Population code	Branches (terete=0, robust=1, selender=2, subglabrous=3, glabrous= 4)	Prickles shape (stout=0, terete=1, winglike=2, flat=3,	prickles (dense=0,scattered=1,	Base of prickles (thickened=1)	Apex of prickles (tapering=0, abruptly=1)	Bristles (absent=0, Dense=1, scattered=2)	numbers of leaflet(minimum) (7=0, 9=1, 11=2)	numbers of leaflet(maximum)	length of leaf (mm) minimum	length of leaf (mm) maximum	length of the first leaflet on apex (mm) minimum	length of the first leaflet on apex(mm) maximum	width of the first leaflet on apex (mm) minimum	width of the first leaflet on apex(mm) maximum	length of the first leaflet on base (mm) minimum	length of the first leaflet on base(mm) maximum	width of the first leaflet on base (mm) minimum	width of the first leaflet on base(mm) maximum	length of pedicel (mm) minimum	length of pedicel (mm) maximum	length of sepal (mm) minimum	length of sepal (mm) maximum	width of sepal (mm) minimum	width of sepal (mm) maximum	Phyllotactic distichous or not(not 0, yes 1)	vein (sunken on adaxial side 0, flat 1)	leaf margin (single-serrate 0, double serrate 1, mixed serrate 2)	leaf margin tooth ( single tooth=0, double tooth= 1)	serrate tooth edge of leaf margin with gland or not(not 0, yes 1)	thorns of petiole and rachis (no 0, rare 1, sparse 2, medium 3, dense 4)	thorns of midrib (no 0, rare 1, sparse 2, medium 3, dense 4)	indumentum of leaf adaxially (pubescent 0，sericeous 1, glabrous 2.	gland of leaf adaxially (no 0, rare 1, sparse 2，medium 3, dense 4)	indumentum of leaf abaxially (no 0, rarely pubesent 1，pubesent 2, sericeous 3, densely hairy 4)	gland of leaf abaxially (no 0, rare 1, sparse 2，medium 3, dense 4)	indumentum of stipule abaxially (no 0, rarely pubescent 1, pubescent 2, sericeous 3, densely hairy 4)	gland of stipule (no 0, only on leaf margin 1, rarely on leaf margin abaxially 2, sparsely except from leaf margin 3，densely except from leaf margin4)	indumentum of petiole and rachis (no 0, rarely pubesent 1，pubesent 2, sericeous 3, densely hairy 4)	gland of petiole and rachis (no 0, rare 1, sparse 2，medium 3, dense 4)	indumentum of pedicel (no 0, rarely pubescent 1，pubescent 2, sericeous 3, densely hairy 4)	gland of pedicel (no 0, rare 1, sparse 2，medium 3, dense 4)	indumentum of receptacle (no 0, rarely pubescent 1，pubescent 2, sericeous 3, densely hairy 4)	gland of receptacle (no 0, rare 1, sparse 2，medium 3, dense 4)	shape of sepals (lanceolate, abaxially subglabrous, adaxially sparsely pubescent, margin entire, apex acuminate or long caudate 0, ovate-lanceolate, abaxially sparsely pubescent or subglabrous, adaxially villous, margin entire, apex acuminate or acute 1, ovate-lanceolate, abaxially sparsely pubescent and glandular, adaxially densely pubescent, margin entire, apex long acuminate 2, lanceolate, 9–1…
Rosa sericea	Tibet, Yadong	27.4172	88.94	2786	GAOXF-16646-1	1	1	1	1	1	1	9	13	24.45	39.45	8.65	13.23	5.12	6.51	4.34	8.94	4.07	5.12	6.8	11.2	5	15	2.3	4.1	0	1	0	0	0	2	4	0	0	2	2	1	1	1	1	0	0	0	0	1
Rosa sericea	Tibet, Yadong	27.4372	88.97	3050	GAOXF-16646-2	1	1	1	1	1	1	9	13	17.9	53.5	8.93	13.1	3.04	4.89	5.12	6.05	2.8	3.45	9.32	12.22	8	13	2.34	5.39	0	1	0	0	0	1	1	0	0	2	2	1	0	0	0	1	1	1	1	1
Rosa sericea	Tibet, Yadong	27.4303	88.97	2995	GAOXF-16646-3	1	1	1	1	1	1	7	13	15.6	43.5	10.03	13.05	4.05	7.06	4.09	10.23	2.5	3.51	6.89	14.54	9	12	2.21	3.47	0	1	0	0	0	1	2	0	0	2	2	1	0	0	0	1	1	1	1	1
Rosa sericea	Tibet, Yadong	27.4303	88.97	2990	GAOXF-16646-4	1	1	1	1	1	1	9	13	21.4	40.5	8.7	12.41	3.49	4.51	4.03	9.32	2.06	2.53	5.98	13.21	9	14	2.27	3.35	0	1	0	0	0	1	4	0	0	2	2	1	1	1	1	1	1	1	1	1
Rosa sericea	Tibet, Yadong	27.4361	88.97	3032	GAOXF-16646-5	1	1	1	1	1	1	7	11	23.4	48.9	8.8	18.92	3.9	6.4	5.9	7.6	2.43	4.34	6.88	10.78	7	15	2.34	3.33	0	1	0	0	0	1	4	0	0	2	2	1	0	0	0	1	1	1	1	1
Rosa sericea	Tibet, Yadong	27.4169	88.94	2793	GAOXF-16646-6	1	1	1	1	1	1	7	13	23.21	45.23	8.21	15.45	3.51	4.32	3.12	5.12	2.53	4.1	7.89	13.21	5	11	2.1	3.46	0	1	0	0	0	1	1	0	0	2	2	1	0	1	1	2	2	2	2	1
Rosa sericea	Tibet, Yadong	27.4157	88.94	2806	GAOXF-16646-7	1	1	1	1	1	1	7	11	30.45	67.43	9.21	17.24	4.21	5.12	5.34	6.12	2.45	3.54	5.98	11.21	6	17	2.11	3.49	0	1	0	0	0	1	1	0	0	2	2	1	0	1	1	0	0	0	0	1
Rosa sericea	Tibet, Yadong	27.4162	88.94	2805	GAOXF-16646-8	1	1	1	1	1	1	9	13	27	51.32	9.32	14.12	4.32	6.12	5.43	8.12	3.41	4.67	8.71	13.43	6	13	2.34	3.44	0	1	0	0	0	1	1	0	0	2	2	1	0	0	0	2	2	2	2	1
Rosa sericea	Tibet, Yadong	27.4191	88.93	2807	GAOXF-16646-9	1	1	1	1	1	1	7	11	30.3	45.4	9.3	16.45	3.56	5.06	4.03	6.08	2.13	2.61	6.54	10.34	6	15	3.1	3.41	0	1	0	0	0	0	1	0	0	2	2	1	0	1	1	0	0	0	0	1
Rosa sericea	Tibet, Yadong	27.5781	88.93	2817	GAOXF-16646-10	1	1	1	1	1	1	9	13	12.5	39.4	8.4	23.42	3.03	3.49	4.06	7.43	3.53	3.8	6.98	11.23	7	14	2	3.42	0	1	0	0	0	1	4	0	0	2	2	1	1	0	0	2	2	2	2	1
Rosa sericea	Tibet, Yadong	27.4217	88.93	2810	GAOXF-16646-11	1	1	1	1	1	1	7	9	21.12	32.34	8.11	29.34	3.41	4.32	3.01	5.09	2.01	2.61	6.43	13.21	5	13	2.9	4.1	0	1	0	0	0	1	4	0	0	2	2	1	1	1	1	0	0	0	0	1
Rosa sericea	Tibet, Yadong	27.4162	88.94	2805	GAOXF-16646-12	1	1	1	1	1	1	9	13	28.92	56.3	9.2	23.45	4.11	5.3	5.02	6.05	2.51	3.43	7.56	11.32	5	19.2	2.21	3.45	0	1	0	0	0	1	4	0	0	0	2	1	1	1	1	2	2	2	2	1
Rosa sericea	Tibet, Yadong	27.4162	88.94	2805	GAOXF-16646-13	1	1	1	1	1	1	9	13	21.3	54.4	9.3	13.2	3.45	5.49	5.4	7.98	2.43	3.44	7.76	11.98	5	12	2.2	3.36	0	1	0	0	0	1	2	0	0	0	2	1	2	1	1	0	0	0	0	1
Rosa sericea	Tibet, Yadong	27.4162	88.94	2805	GAOXF-16646-14	1	1	1	1	1	1	7	13	27.43	65.43	9.12	24.87	3.31	5.54	5.32	7.86	2.53	3.65	6.54	11.45	4	13	2.23	3.42	0	1	0	0	0	1	4	0	0	0	2	1	2	1	1	2	2	2	2	1
Rosa sericea	Tibet, Yadong	27.4162	88.94	2805	GAOXF-16646-15	1	1	1	1	1	1	9	13	28.76	56.43	9.43	31.21	4.12	4.65	4.12	6.65	2.51	3.87	5.65	11	9	14	2.3	3.33	0	1	0	0	0	0	2	0	0	0	2	1	2	1	1	0	0	0	0	1
Rosa sericea	Tibet, Cuona	27.9102	91.8	2935	GAOXF-16692-1	1	1	1	1	1	1	7	13	21.32	43.21	5.12	24.56	3.12	4.1	3.51	5.12	2.54	5.12	6.76	12.34	8	13	2.1	3.9	0	1	0	0	0	0	2	0	0	0	2	1	2	0	0	2	2	2	2	1
Rosa sericea	Tibet, Cuona	27.8726	91.79	2917	GAOXF-16692-2	1	1	1	1	1	1	7	13	22.31	36.78	7.34	17.86	3.12	5.12	3.23	5.61	2.54	4.3	7.54	13.32	7	12	2.5	3.44	0	1	0	0	0	0	2	0	0	0	2	1	2	0	0	2	2	2	2	1
Rosa sericea	Tibet, Cuona	27.8694	91.79	2996	GAOXF-16692-3	1	1	1	1	1	1	9	13	29.87	55.65	8.12	14.56	3.54	4.53	5.56	8.98	2.56	4.32	7.71	12.31	6	11	2.39	3.65	0	0	0	0	0	0	0	0	0	0	2	1	2	3	3	2	2	2	2	1
Rosa sericea	Tibet, Cuona	27.8786	91.79	2913	GAOXF-16692-4	1	1	1	1	1	1	7	13	22.34	41.23	8.74	15.67	4.51	5.06	6.12	9.04	3.03	4.32	7.64	9.87	7	13	2.31	3.55	0	0	0	0	0	0	0	0	0	0	2	1	2	3	3	0	0	0	0	1
Rosa sericea	Tibet, Cuona	27.8744	91.8	3005	GAOXF-16692-5	1	1	1	1	1	1	7	13	30	45	9	17.43	3	4	4	6	2.5	3.5	5.77	10.12	7	13	3.1	3.75	0	0	0	0	0	0	0	0	0	0	2	1	2	3	3	1	1	1	1	1
Rosa sericea	Tibet, Cuona	27.8744	91.8	3005	GAOXF-16692-6	1	1	1	1	1	1	9	13	30	40	10	12	4	6	5	7	2.5	3	5.97	12.76	7	12.3	3.2	3.44	0	0	0	0	0	0	0	0	0	0	2	1	2	3	3	1	1	1	1	1
Rosa sericea	Tibet, Cuona	27.8728	91.8	3012	GAOXF-16692-7	1	1	1	1	1	1	9	13	35	45	9	13	4	5.5	5	6	2.5	3	8.76	11.23	8	12.34	3.1	3.46	0	0	0	0	0	0	0	0	0	0	2	1	2	3	3	1	1	1	1	1
Rosa sericea	Tibet, Gyaca	29.1304	92.69	3188	GAOXF-16734	1	1	1	1	1	1	7	13	20	30	6	12.34	3.5	4	4	6	2.5	3	7.5	14.12	7	12.21	3.33	3.43	0	0	0	0	0	0	0	0	0	0	2	1	2	3	3	2	2	2	2	1
Rosa sericea	Sichuan, Baoxing	30.77	102.72	2325	GAOXF-17017-1	1	1	1	1	1	1	7	13	20.13	35	9.12	12.32	4.35	5.13	5.05	7.12	2.54	4.15	11	14	8	13.21	3	4.3	0	0	0	0	0	0	0	0	0	0	2	2	2	4	4	0	0	0	0	1
Rosa sericea	Sichuan, Baoxing	30.77	102.72	2334	GAOXF-17017-2	1	1	1	1	1	1	7	13	28.12	65.43	9.12	14.56	5.14	7.34	6.12	8.11	3.12	4.18	11	13.45	8	17.32	4.5	5.32	0	0	0	0	0	0	0	0	0	2	2	4	2	4	4	2	2	2	2	1
Rosa sericea	Sichuan, Baoxing	30.78	102.72	2350	GAOXF-17017-3	1	1	1	1	1	1	7	13	23.54	63.23	9.12	14.56	4.12	6.13	6.12	8.71	3.42	5.12	11	14.2	9	14.32	4	5.01	0	0	0	0	0	0	0	0	0	2	1	3	1	4	4	0	0	0	0	1
Rosa sericea	Sichuan, Baoxing	30.78	102.72	2362	GAOXF-17017-4	1	1	1	1	1	1	9	11	23.12	67.81	9.12	13.45	6.13	8.14	5.12	8.14	3.12	4.67	9	10	8	12.31	4.5	6.5	0	0	0	0	0	1	0	0	0	2	0	3	1	4	4	3	3	3	3	1
Rosa sericea	Sichuan, Baoxing	30.78	102.72	2363	GAOXF-17017-5	1	1	1	1	1	1	7	13	24.45	56.78	7.89	13.45	5.13	6.05	5.67	11.23	3.54	5.43	10	11	8	13.2	4	5.43	0	0	0	0	0	1	0	0	0	2	1	3	1	4	4	3	3	3	3	1
Rosa sericea	Sichuan, Baoxing	30.78	102.72	2365	GAOXF-17017-6	1	1	1	1	1	1	7	13	27.45	65.43	8.12	14.36	4.05	7.13	5.13	8.73	3.54	5.76	7	15.32	11	19.32	3.5	4.5	0	0	0	0	0	1	0	0	0	2	1	3	1	4	4	3	3	3	3	1
Rosa omeiensis	Sichuan, Baoxing	30.83	102.72	3127	GAOXF-17018-1	2	2	1	1	1	0	7	15	25.43	39.87	7.34	16.54	4.65	6.54	6.1	9.97	3.56	5.43	7	13	8	12.31	2.5	3.21	0	1	0	0	0	0	0	0	0	2	1	0	1	0	0	3	3	3	3	0
Rosa omeiensis	Sichuan, Baoxing	30.83	102.72	3124	GAOXF-17018-2	2	2	1	1	1	0	7	17	30.12	41.23	8.12	13.42	4.67	5.13	5.43	8.05	3.12	4.56	6	11.23	6	11.3	2.5	3.3	0	0	0	0	0	0	0	0	0	2	1	0	1	1	1	0	0	0	0	0
Rosa omeiensis	Sichuan, Baoxing	30.83	102.72	3127	GAOXF-17018-3	2	2	1	1	1	1	7	15	21.35	74.32	7.89	12.34	4.56	5.76	4.81	6.14	3.56	4.78	7	10.67	9	10.23	2.5	3.41	0	0	0	0	0	0	0	0	0	2	1	0	1	1	1	3	3	3	3	0
Rosa omeiensis	Sichuan, Baoxing	30.83	102.72	3156	GAOXF-17018-4	2	2	1	1	1	0	7	17	25	47.87	7.82	13.21	4.5	5.32	5.13	7.14	3.12	4.34	11	12	11	12	2.5	3.33	0	0	0	0	0	0	0	0	0	2	2	0	1	1	1	0	0	0	0	0
Rosa omeiensis	Sichuan, Baoxing	30.83	102.72	3158	GAOXF-17018-5	2	2	1	1	1	0	7	15	20.34	67.5	7.65	12.45	4	5	4.01	5.6	2.5	3.5	5	13.23	7	13.21	2	3.12	0	0	0	0	0	0	0	0	0	2	1	0	0	1	1	0	0	0	0	0
Rosa omeiensis	Sichuan, Baoxing	30.83	102.72	3161	GAOXF-17018-6	2	2	1	1	1	0	7	17	30	49.87	9	13.21	4.5	6	5.13	9.89	4	5.09	10	11.34	12	13	3	3.5	0	1	0	0	0	0	0	0	0	2	2	0	1	0	0	0	0	0	0	0
Rosa omeiensis	Sichuan, Xianojin	30.89	102.654	3593	GAOXF-17022-1	2	2	1	1	1	0	7	17	30	67.53	8	13.22	5	6	4.51	9.32	3	6.23	6	13.23	11	12	3.01	3.45	0	1	0	0	0	0	0	0	0	2	0	0	1	0	0	0	0	0	0	0
Rosa omeiensis	Sichuan, Xianojin	30.88	102.65	3588	GAOXF-17022-2	2	2	1	1	1	0	9	17	35	50.45	11	14	4.5	5.5	5.67	8.91	2.5	5.12	10	12.34	9	10	2.5	3.22	0	0	0	0	0	0	0	0	0	2	1	1	4	3	3	0	0	0	0	0
Rosa omeiensis	Sichuan, Xianojin	30.88	102.65	3593	GAOXF-17022-3	2	2	1	1	1	1	7	15	25.76	46.57	7	12.31	5.54	6	5.63	7.99	3	4.53	5	12.1	11	12	3.2	3.51	0	0	0	0	0	0	0	0	0	2	0	0	0	0	0	0	0	0	0	0
Rosa omeiensis	Sichuan, Xianojin	30.88	102.65	3591	GAOXF-17022-4	2	2	1	1	1	1	7	15	21	83.21	7	12.34	3.5	4	4.56	6	2.57	4.53	7	11.23	9	10	2	3.21	0	1	0	0	0	0	0	0	0	2	1	0	2	0	0	0	0	0	0	0
Rosa omeiensis	Sichuan, Xianojin	30.88	102.65	3591	GAOXF-17022-5	2	2	1	1	1	1	9	15	25	54.89	8	13.45	4.56	5.5	5.12	7	3	4	10	13.45	11	13	3	3.22	0	1	0	0	0	1	0	0	0	2	0	0	1	0	0	0	0	0	0	0
Rosa omeiensis	Sichuan, Erlang Mountain	29.8511	102.287	2885.69	GAOXF-17314—1	2	2	1	1	1	0	7	17	35	50.8	16	21	7.5	10	9.13	13.23	4	5	9	30.1	9.6	10.7	2.1	4.1	0	1	0	0	0	0	0	2	0	2	1	0	0	1	1	0	0	0	0	0
Rosa omeiensis	Sichuan, Erlang Mountain	29.8544	102.285	2910.6	GAOXF-17314—2	2	2	1	1	1	0	9	17	34.56	85.67	9.65	14.35	5.65	8.13	8.12	11.32	4.12	6.14	11.2	28	7.8	18	2.4	4.2	0	1	0	0	0	2	1	2	0	2	1	0	1	0	0	0	0	0	0	0
Rosa omeiensis	Sichuan, Erlang Mountain	29.8577	102.284	2900.59	GAOXF-17314—3	2	2	1	1	1	1	9	17	39.87	87.92	12.3	15.3	5.9	7.43	8.31	9.54	3.67	5.78	11.3	29.1	8.3	13	3.1	4.5	0	1	0	0	0	0	0	2	0	2	1	0	1	1	1	0	0	0	0	0
Rosa omeiensis	Sichuan, Erlang Mountain	29.8579	102.284	2908.01	GAOXF-17314—4	2	2	1	1	1	0	7	17	30.21	58.76	11	33.45	5.43	7.87	6	10	4	5.06	8.3	19.8	8.6	23	2.8	4.8	0	1	0	0	0	2	1	2	0	2	1	0	1	0	0	0	0	0	0	0
Rosa omeiensis	Sichuan, Erlang Mountain	29.8578	102.284	2904.28	GAOXF-17314—5	2	1	1	1	1	1	7	15	23.43	59.88	8.71	13.23	4.98	5.67	5.23	7.65	3.45	5.61	11.1	24	9.8	16	2.1	4.2	0	0	0	0	0	0	0	2	0	2	1	1	0	3	3	0	0	0	0	0
Rosa sericea	Sichuan, Erlang Mountain	29.85	102.26	2738	GAOXF-17316—1	1	1	1	1	1	1	9	13	23.34	36.54	8.72	23.45	4.23	6.45	4.23	8.92	3.54	5.87	3	32	19	26	2.4	3.9	0	0	0	0	0	0	0	0	0	0	2	3	0	3	3	0	0	0	0	1
Rosa sericea	Sichuan, Erlang Mountain	29.85	102.26	2730	GAOXF-17316—2	1	1	1	1	1	1	9	13	17.9	53.5	8.93	18.54	3.04	4.89	5.12	6.05	2.8	3.45	8.7	16	12	23	2.1	4	0	0	0	0	0	0	0	0	0	0	2	3	0	4	4	1	1	1	1	1
Rosa sericea	Sichuan, Erlang Mountain	29.85	102.26	2731	GAOXF-17316—3	1	1	1	1	1	1	7	11	15.6	43.5	10.03	21.21	4.05	7.06	4.09	7.01	2.5	3.51	9.1	31	11.4	18.2	2.5	3.1	0	0	0	0	0	1	0	0	0	0	2	2	0	2	2	0	0	0	0	1
Rosa sericea	Sichuan, Erlang Mountain	29.8546	102.261	2691.1	GAOXF-17316—4	1	1	1	1	1	1	9	13	21.4	40.5	8.7	14.56	3.49	4.51	4.03	6.01	2.06	2.53	4	14	19	27	2.1	3	0	0	0	0	0	1	0	0	0	0	2	2	0	3	3	0	0	0	0	1
Rosa sericea	Sichuan, Erlang Mountain	29.8546	102.261	2692.62	GAOXF-17316—5	1	1	1	1	1	1	7	11	23.4	48.9	8.8	12.31	3.9	6.4	5.9	7.6	2.43	4.34	8	18.4	7	12	3.1	4.9	0	0	0	0	0	1	0	0	0	0	2	1	0	2	2	0	0	0	0	1
Rosa sericea	Sichuan, Erlang Mountain	29.8424	102.248	2497.53	GAOXF-17322—1	1	1	1	1	1	1	7	13	23.21	45.23	8.21	13.45	3.51	4.32	3.12	5.12	2.53	4.1	7.3	17.3	6.7	14	3.2	5	0	1	0	0	0	2	4	0	0	0	2	0	1	0	0	0	0	0	0	1
Rosa sericea	Sichuan, Erlang Mountain	29.8424	102.248	2502.5	GAOXF-17322—3	1	1	1	1	1	1	7	11	30.45	67.43	9.21	17.65	4.21	5.12	5.34	6.12	2.45	3.54	3	8.1	11	24	3.2	4.8	0	1	0	0	0	1	1	0	0	0	2	0	0	0	0	0	0	0	0	1
Rosa sericea	Sichuan, Erlang Mountain				GAOXF-17322—5	1	1	1	1	1	1	9	13	27	51.32	9.32	14.12	4.32	6.12	5.43	8.12	3.41	4.67	3.9	13.5	18.7	26	2.3	3.2	0	1	0	0	0	1	2	0	0	0	2	0	0	0	0	0	0	0	0	1
Rosa sericea	Sichuan, Erlang mountain	29.8464	102.26	2409	GAOXF-17323—1	1	1	1	1	1	1	9	13	12.5	39.4	8.4	15.65	3.03	3.49	4.06	5.02	3.53	3.8	8	10	6	10.4	2.3	2.5	0	0	0	0	0	1	0	0	0	0	2	1	0	2	2	0	0	0	0	1
Rosa sericea	Sichuan, Erlang mountain	29.8463	102.26	2408	GAOXF-17323—2	1	1	1	1	1	1	7	9	21.12	32.34	8.11	13.43	3.41	4.32	3.01	5.09	2.01	2.61	3.21	4.1	6.5	12.2	2.1	2.56	0	1	0	0	0	2	4	0	0	0	2	0	1	0	0	0	0	0	0	1
Rosa sericea	Sichuan, Erlang mountain	29.8465	102.259	2420	GAOXF-17323—3	1	1	1	1	1	1	9	13	28.92	56.3	9.2	12.4	4.11	5.3	5.02	6.05	2.51	3.43	4.8	11	10	18	3	3.9	0	1	0	0	0	1	1	0	0	0	2	0	1	0	0	0	0	0	0	1
Rosa sericea	Sichuan, Erlang mountain	29.8465	102.259	2420	GAOXF-17323—4	1	1	1	1	1	1	9	13	21.3	54.4	9.3	17.87	3.45	5.49	5.4	7.98	2.43	3.44	4	12.1	13	29	2.1	3.8	0	1	0	0	0	1	2	0	0	0	2	0	1	0	0	0	0	0	0	1
Rosa sericea	Sichuan, Erlang mountain	29.8465	102.259	2420	GAOXF-17323—5	1	1	1	1	1	1	7	13	27.43	65.43	9.12	16.54	3.31	5.54	5.32	7.86	2.53	3.65	4.2	19	8.8	23	3.7	3.6	0	1	0	0	0	1	2	0	0	0	2	0	1	0	0	0	0	0	0	1
Rosa sericea	Sichuan, Erlang Mountain	29.8428	102.254	2247.08	GAOXF-17324—1	1	1	1	1	1	1	9	13	28.76	56.43	9.43	12.31	4.12	4.65	4.12	6.65	2.51	3.87	4.6	11.7	9.9	15	2.5	3	0	1	0	0	0	1	4	0	0	0	2	0	1	0	0	0	0	0	0	1
Rosa sericea	Sichuan, Erlang Mountain	29.8429	102.254	2245.07	GAOXF-17324—2	1	1	1	1	1	1	7	13	20	28	6.54	9.89	3.12	4.32	3.31	5.12	2.54	2.56	5.3	18.1	5.1	13.5	3.6	4.1	0	1	0	0	0	1	1	0	0	0	2	0	1	0	0	0	0	0	0	1
Rosa sericea	Sichuan, Erlang Mountain	29.843	102.254	2248.96	GAOXF-17324—3	1	1	1	1	1	1	9	13	25.67	68.43	8.12	21.34	3.98	5.21	3.8	5.99	2.61	4.12	7.8	17.2	7.8	15.2	2.7	3.9	0	1	0	0	0	1	1	0	0	0	2	0	1	0	0	0	0	0	0	1
Rosa omeiensis	Sichuan, Xiangcheng	29.1223	99.9907	3970.7	GAOXF-17373—1	2	2	1	1	1	0	9	15	34.5	87.62	10.43	25.67	6.12	8.43	7.13	10.45	4.53	6.43	10	26	8	16	2.3	4.3	0	1	0	0	0	1	0	2	0	2	1	3	2	1	1	0	0	0	0	0
Rosa omeiensis	Sichuan, Xiangcheng	29.1222	99.9907	3970.6	GAOXF-17373—2	2	2	1	1	1	0	7	15	23.45	83.58	10.21	32.21	4.31	6.12	4.12	9.34	3.12	5.91	7.89	17	8.9	13.2	2.6	3.2	0	1	0	0	0	1	0	2	0	2	1	3	0	1	1	0	0	0	0	0
Rosa omeiensis	Sichuan, Xiangcheng	29.1221	99.9908	3970.85	GAOXF-17373—3	2	2	1	1	1	0	9	13	27.89	68.79	9.87	35.67	5.31	7.12	6.45	9.78	3.51	4.63	8.71	13	10	11	3.2	5	0	1	0	0	0	0	0	2	0	2	1	1	1	1	1	0	0	0	0	0
Rosa omeiensis	Sichuan, Xiangcheng	29.1222	99.9906	3980.94	GAOXF-17373—4	2	2	1	1	1	0	9	15	35.4	73.1	9.7	39.78	4.43	8.04	7.12	11.31	3.23	5.13	12	34	9.3	11.7	2.7	4.5	0	1	0	0	0	2	0	2	0	2	1	2	2	1	1	0	0	0	0	0
Rosa omeiensis	Sichuan, Xiangcheng	29.1222	99.9905	3981.49	GAOXF-17373—5	2	2	1	1	1	1	9	13	43.4	68.76	10.12	14.32	4.35	5.51	5.98	8.13	2.53	3.87	12	24	9.1	12.8	2.1	4.4	0	1	0	0	0	2	0	2	0	2	1	1	1	2	2	0	0	0	0	0
Rosa sikangensis	Sichuan, Xiangcheng	29.1396	99.9652	3717.34	GAOXF-17375—1	3	1	1	1	0	2	7	13	28.91	46.76	8.09	14.32	4.12	6.31	6.11	10.32	4.21	5.15	12.1	25.3	10.3	10.7	3.1	6.3	0	0	1	1	1	1	4	1	0	1	3	3	2	1	1	1	1	1	1	2
Rosa sikangensis	Sichuan, Xiangcheng	29.1398	99.965	3714.71	GAOXF-17375—2	3	1	1	1	0	2	7	13	23.87	43.23	9.78	13.2	5.34	7.53	5.12	9.81	4.32	5.9	11.2	25.2	9.8	17.1	3.2	5.9	0	0	1	1	1	3	4	1	0	1	2	3	3	1	1	2	2	2	2	2
Rosa omeiensis	Sichuan, Xiangcheng	29.1337	99.9708	3831.88	GAOXF-17376—1	2	2	1	1	1	0	9	15	34.2	86.34	9.8	41.1	5.23	6.58	8.07	11.23	3.12	4.07	10.2	20.4	9.7	12.2	2.4	4.1	0	1	0	0	0	1	0	2	0	2	1	2	1	2	2	0	0	0	0	0
Rosa omeiensis	Sichuan, Xiangcheng	29.1328	99.9705	3838.28	GAOXF-17376—2	2	2	1	1	1	0	9	17	32.21	68.56	9.78	34.54	4.56	8.76	7.86	12.32	3.98	5.43	11.3	25	10	17	2.6	4.2	0	1	0	0	0	1	0	2	0	2	1	1	1	2	2	1	1	1	1	0
Rosa omeiensis	Sichuan, Xiangcheng	29.1326	99.9704	3832.35	GAOXF-17376—3	2	2	1	1	1	0	9	17	26.76	59.87	10.21	31.12	4.78	8.76	9.12	13.21	2.89	5.63	11.4	20.6	9.3	12.3	2.2	4.9	0	1	0	0	0	0	0	2	0	2	1	1	2	1	1	0	0	0	0	0
Rosa omeiensis	Sichuan, Xiangcheng	29.1325	99.9704	3835.42	GAOXF-17376—4	2	2	1	1	1	0	9	15	43.23	96.54	10.34	26.54	6.57	9.23	11.12	13.34	5.45	7.56	8	14	10	12	3.4	5	0	1	0	0	0	1	0	2	0	2	1	1	1	1	1	2	2	2	2	0
Rosa omeiensis	Sichuan, Xiangcheng	29.1323	99.9705	3837.34	GAOXF-17376—5	2	2	1	1	1	0	9	15	34.32	80.34	8.97	29.76	6.54	7.56	7.63	9.8	4.13	5.73	9	13	11	11.34	4.5	5.1	0	1	0	0	0	0	0	2	0	2	1	0	1	2	2	0	0	0	0	0
Rosa omeiensis	Sichuan, Xiangcheng	29.1404	99.9631	3679.29	GAOXF-17377—1	2	2	1	1	1	0	7	15	21.3	49.78	9.81	24.54	6.21	9.76	7.09	11.23	4.03	5.43	11.3	20.9	9.9	13	2.5	5	0	1	0	0	0	0	0	2	0	2	1	1	1	2	2	1	1	1	1	0
Rosa omeiensis	Sichuan, Xiangcheng	29.1404	99.9628	3677.3	GAOXF-17377—2	2	2	1	1	1	1	11	17	22.78	92.23	7.89	23.41	4.12	5.56	4.34	6.23	3.54	5.61	11.4	20.7	9.1	12.4	2.3	5.3	0	0	0	0	0	2	0	2	0	2	1	2	2	3	3	0	0	0	0	0
Rosa omeiensis	Sichuan, Xiangcheng	29.1405	99.9625	3666	GAOXF-17377—3	2	2	1	1	1	1	5	15	21.34	89.76	9.23	17.65	4.65	6.12	5.45	8.79	3.98	6.45	13	22	8.6	12.6	2.9	4.2	0	0	0	0	0	0	0	2	0	2	1	1	1	3	3	2	2	2	2	0
Rosa omeiensis	Sichuan, Xiangcheng	29.1408	99.9617	3664	GAOXF-17377—4	2	2	1	1	1	1	7	15	23.45	78.65	7.89	19.32	5.21	7.12	7.05	12.12	3.09	4.54	7.8	12.3	9.2	11.3	3.8	5.3	0	1	0	0	0	1	0	2	0	2	1	0	1	1	1	0	0	0	0	0
Rosa omeiensis	Sichuan, Xiangcheng	29.141	99.9612	3663	GAOXF-17377—5	2	2	1	1	1	0	7	13	23.34	40.46	6.78	29.34	3.4	5.3	4.3	5.09	2.67	3.56	8.9	12.4	8.9	10.3	2.9	5.1	0	1	0	0	0	0	0	2	0	2	0	3	1	3	3	2	2	2	2	0
Rosa omeiensis	Sichuan, Xiangcheng	29.1413	99.9601	3650	GAOXF-17377—6	2	2	1	1	1	1	9	17	28.76	87.34	8.91	28.67	5.43	8.23	5.88	9.89	3.41	5.43	12	16	9	13	3.5	4.9	0	1	0	0	0	0	0	2	0	2	1	1	1	2	2	0	0	0	0	0
Rosa sikangensis	Sichuan, Xiangcheng	29.1502	99.9345	3572	GAOXF-17380—1	3	1	1	1	0	2	7	13	19.87	43.23	6.32	18.9	4.12	5.04	4.07	6.09	2.53	4.09	7.8	15.4	9.3	11	2.54	4.4	0	0	1	1	1	2	3	1	0	1	2	3	1	0	0	3	3	3	3	2
Rosa sikangensis	Sichuan, Xiangcheng	29.1502	99.9345	3574.72	GAOXF-17380—2	3	1	1	1	0	2	7	11	15	35	6.45	17.67	4.32	5.03	6.78	9.13	3.41	5.43	12.4	25.6	10.1	12	3.4	6.5	0	0	1	1	1	3	4	1	0	1	4	3	4	2	2	3	3	3	3	2
Rosa sikangensis	Sichuan, Xiangcheng	29.15	99.9343	3573.59	GAOXF-17380—3	3	1	1	1	0	2	7	11	29.4	47.98	5.87	19.78	3.42	5.69	4.81	7.41	3.54	4.91	12.8	25.5	10.3	14	3.5	6.5	0	0	1	1	1	4	3	1	0	1	2	3	2	3	3	3	3	3	3	2
Rosa sericea	Sichuan, Xiangcheng	29.1498	99.9341	3571.62	GAOXF-17380—4	1	1	1	1	1	1	7	13	24.3	63.41	9.04	14.5	3.03	5.51	6.4	9.81	3.41	4.06	5.9	11.4	7.6	16	2.9	3.9	0	0	0	0	0	0	0	0	0	0	0	2	2	4	4	0	0	0	0	1
Rosa sikangensis	Sichuan, Xiangcheng	29.1497	99.9341	3567.08	GAOXF-17380—5	3	1	1	1	0	2	7	11	21.23	39.78	5.67	11.23	3.54	4.52	4.05	6.56	3.23	4.57	12.9	26.8	11	12.9	3.9	5.9	0	0	1	1	1	2	4	1	0	1	3	3	3	2	2	2	2	2	2	2
Rosa sericea	Sichuan, Xiangcheng	29.1508	99.9343	3575.15	GAOXF-17380—6	1	1	1	1	1	1	7	11	32.4	48.9	9.71	15.1	3	5.41	5.31	9.71	3.21	4.81	6	11.2	6.9	13.2	2.2	3.1	0	0	0	0	0	0	0	0	0	0	0	2	2	4	4	0	0	0	0	1
Rosa sericea	Sichuan, Xiangcheng	29.1536	99.9306	3412.35	GAOXF-17383—1	1	1	1	1	1	1	7	11	26.51	56.67	9	13.41	3.1	5.45	4.94	10.23	3.12	4.11	6.9	11.5	9.1	13.6	2.5	3.4	0	0	0	0	0	0	0	0	0	0	0	2	0	4	4	0	0	0	0	1
Rosa sikangensis	Sichuan, Xiangcheng	29.1554	99.929	3386.81	GAOXF-17383—2	3	1	1	1	0	2	7	11	22.41	36.5	8.3	13.45	3.51	5.12	4.03	7.08	2.51	3.51	12.1	25.8	12	13.9	3.1	5.4	0	0	1	1	1	3	3	1	0	1	4	4	3	3	3	2	2	2	2	2
Rosa sikangensis	Sichuan, Xiangcheng	29.1525	99.9303	3362.47	GAOXF-17383—3	3	1	1	1	0	2	7	13	25.65	39.97	6.78	13.2	4.31	5.56	5.03	7.43	3.11	4.35	10.3	26.1	9	14	3.4	6.1	0	0	1	1	1	2	3	1	0	1	2	4	1	3	3	2	2	2	2	2
Rosa sericea	Sichuan, Xiangcheng	29.1524	99.9303	3362.34	GAOXF-17383—4	1	1	1	1	1	1	9	13	31.23	71.12	9.32	14.54	3.12	5.52	5.12	10.12	3.11	4.31	6	11.2	6.9	13.2	2.2	3.1	0	0	0	0	0	0	0	0	0	0	0	2	0	4	4	0	0	0	0	1
Rosa sikangensis	Sichuan, Xiangcheng	29.1523	99.9304	3376.16	GAOXF-17383—5	3	1	1	1	0	2	7	9	18.93	44.98	9.43	13.4	5.32	7.43	5.13	10.31	4.09	6.03	10.9	26.1	10.5	12.1	2.9	4.9	0	0	1	1	1	2	3	1	0	1	2	4	3	1	1	2	2	2	2	2
Rosa sericea	Sichuan, Xiangcheng	29.1523	99.9304	3384.25	GAOXF-17383—6	1	1	1	1	1	1	9	13	33.5	64.3	6.3	10.31	3.1	4.51	2.32	6.54	2.34	4.43	7.1	12.2	9	13.1	2.5	3.3	0	0	0	0	0	0	0	0	0	0	0	3	2	3	3	0	0	0	0	1
Rosa sericea	Sichuan, Xiangcheng	29.1417	99.9107	3176.9	GAOXF-17384—1	1	1	1	1	1	1	7	9	14.65	37.64	6.98	12.11	3.43	5.09	2.98	5.08	2.01	3.04	6.5	17.4	7.6	14	2.1	3.4	0	0	0	0	0	1	0	0	0	0	0	2	2	4	4	2	2	2	2	1
Rosa sericea	Sichuan, Xiangcheng	29.1418	99.9107	3168.6	GAOXF-17384—2	1	1	1	1	1	1	7	11	20.31	38.73	9.8	12.21	4.43	7.52	5.11	9.12	3.21	5.31	5.6	11	6.6	13	2.4	2.9	0	0	0	0	0	1	3	0	0	0	0	0	0	1	1	2	2	2	2	1
Rosa sikangensis	Sichuan, Xiangcheng	29.1417	99.9108	3168.58	GAOXF-17384—3	3	1	1	1	0	2	7	11	23.5	46.4	9.45	13.5	5.12	7.04	4.012	9.03	3.46	5.21	4.3	16	4.9	12.9	2.7	4.3	0	0	1	1	1	1	3	1	0	1	2	4	1	3	3	2	2	2	2	2
Rosa sericea	Sichuan, Xiangcheng	29.1363	99.9091	3151.29	GAOXF-17384—4	1	1	1	1	1	1	9	11	24.89	39.43	9.87	13.2	5.2	6.04	4.05	5.21	2.47	3.91	8	14.8	5.4	13.3	2.2	3.1	0	0	0	0	0	0	0	0	0	0	0	1	0	4	4	0	0	0	0	1
Rosa sikangensis	Sichuan, Xiangcheng	29.1415	99.9108	3170.36	GAOXF-17384—5	3	1	1	1	0	2	9	11	30.23	40.32	9.34	13.45	5.12	7.31	4.32	9.23	3.5	5.12	4.1	15.8	5.3	12.8	2.3	3.1	0	0	1	1	1	1	3	1	0	1	2	4	1	3	3	2	2	2	2	2
Rosa sericea	Sichuan, Xiangcheng	29.1414	99.911	3170.11	GAOXF-17384—6	1	1	1	1	1	1	7	11	20.45	37.8	9.78	13.5	5.04	6.21	4.12	5.4	2.51	3.24	9	12	10	11	2	3.5	0	0	0	0	0	0	0	0	0	0	0	1	0	4	4	0	0	0	0	1
Rosa sikangensis	Sichuan, Xiangcheng	29.1415	99.9107	3170.55	GAOXF-17384—7	3	1	1	1	0	2	7	11	23.41	40.34	9.04	13.45	5.11	7.08	4.12	9.34	3.45	5.09	4.5	15.6	5.6	12.3	2.3	3.8	0	0	1	1	1	3	3	1	0	1	2	4	1	3	3	2	2	2	2	2
Rosa sericea	Sichuan, Xiangcheng	29.1134	99.908	2941.69	GAOXF-17385—1	1	1	1	1	1	1	7	9	23.4	39.7	9.67	13.2	5.3	6.09	4.1	5.12	2.51	3.05	8.2	20.8	12.1	18.3	2.1	3.8	0	0	0	0	0	0	0	0	0	0	0	1	0	4	4	0	0	0	0	1
Rosa sikangensis	Sichuan, Xiangcheng	29.1134	99.9082	2942.96	GAOXF-17385—2	3	1	1	1	0	2	7	11	18.98	48.67	8.71	13.54	5.03	7.09	3.97	9.03	3.41	5.08	12.4	19.8	8.5	12.3	2.3	3.3	0	0	1	1	1	4	4	1	0	1	2	4	1	3	3	2	2	2	2	2
Rosa sikangensis	Sichuan, Xiangcheng	29.1135	99.9079	2946.97	GAOXF-17385—3	3	1	1	1	0	2	7	11	13.41	39.87	6.21	8.11	4.05	6.34	5.09	6.02	4.09	4.51	9.6	14.7	8.1	9	1.7	2.9	0	0	1	1	1	3	3	1	0	1	3	4	2	3	3	1	1	1	1	2
Rosa sikangensis	Sichuan, Xiangcheng	29.1131	99.9083	2940.85	GAOXF-17385—4	3	1	1	1	0	2	7	11	27.61	63.56	8.97	13.21	5.05	7.31	4.12	8.76	3.53	5.43	8.7	21	10	21	2.5	2.9	0	0	1	1	1	3	3	1	0	1	2	3	1	3	3	2	2	2	2	2
Rosa sikangensis	Sichuan, Xiangcheng	29.1129	99.9083	2927.6	GAOXF-17385—5	3	1	1	1	0	2	9	11	19.87	39.87	6.12	8.11	4.12	5.09	3.12	5.14	2.69	4.34	11	19.7	7.6	13	1.8	2.6	0	0	1	1	1	3	3	1	0	1	2	3	1	2	2	3	3	3	3	2
Rosa sikangensis	Sichuan, Xiangcheng	28.9698	99.8405	2797.29	GAOXF-17386—1	3	1	1	1	0	2	7	9	14.66	40.68	10.29	14.56	3.34	5.94	4	6	3.47	4.28	5.8	14.1	6.4	15	2.1	4.8	0	0	1	1	1	3	3	1	0	1	2	4	1	0	0	4	4	4	4	2
Rosa sikangensis	Sichuan, Xiangcheng	28.9697	99.8404	2792.91	GAOXF-17386—2	3	1	1	1	0	2	7	11	14.6	34.4	8.5	11.4	3.48	6.05	6.09	9.08	3.04	4.57	5.9	14.9	5.9	16.1	2.7	3.9	0	0	1	1	1	3	3	1	0	1	4	4	4	2	2	0	0	0	0	2
Rosa sikangensis	Sichuan, Xiangcheng	28.9697	99.8403	2792.67	GAOXF-17386—3	3	1	1	1	0	2	7	9	18.31	36.54	5.12	9.31	3.52	5.12	4.11	9.32	3.52	4.63	6.8	10.2	7.3	13.4	2.6	3.6	0	0	1	1	1	2	4	1	0	1	2	4	2	3	3	3	3	3	3	2
Rosa sikangensis	Sichuan, Xiangcheng	28.9696	99.84	2794.48	GAOXF-17386—4	3	1	1	1	0	2	7	11	20.3	33.4	5.9	18.98	3.51	4.51	4.02	6.21	2.51	3.03	3.4	9.1	6.9	11.5	2.3	3.3	0	0	1	1	1	2	3	1	0	1	3	4	3	2	2	4	4	4	4	2
Rosa sikangensis	Sichuan, Xiangcheng	28.9699	99.8408	2790.29	GAOXF-17386—5	3	1	1	1	0	2	7	9	20	32.4	8.4	10.9	3.45	5.05	4.03	11.23	2.45	3.51	5.4	13	5.7	7.9	1.9	2.5	0	0	1	1	1	2	4	1	0	1	4	4	3	3	3	4	4	4	4	2
Rosa sericea	Tibet, Yadong	27.455	88.9151	2872.27	GAOXF-17510—1	1	1	1	1	1	1	9	13	20.78	64.82	14.8	19.56	4.71	8.87	4.45	6.51	3.41	3.12	8.9	28	12	18	2.8	4.3	0	0	0	0	0	2	0	2	0	2	3	1	0	3	3	0	0	0	0	1
Rosa sericea	Tibet, Yadong	27.4542	88.9159	2859.43	GAOXF-17510—2	1	1	1	1	1	1	5	11	14.3	41.3	5.62	6.71	4.01	5.59	5.1	6.21	2.53	3.21	3	19.1	7.6	14.6	3.1	4	0	0	0	0	0	2	0	2	0	2	3	1	0	3	3	0	0	0	0	1
Rosa sericea	Tibet, Yadong	27.4541	88.9158	2862.74	GAOXF-17510—3	1	1	1	1	1	1	7	11	17.97	33.4	6.09	8.1	3.54	4.11	5.21	5.19	2.44	3.12	3.2	17.7	8.3	17.1	2.8	3.5	0	0	0	0	0	2	0	2	0	2	3	1	1	3	3	0	0	0	0	1
Rosa sericea	Tibet, Yadong	27.4538	88.9162	2855.29	GAOXF-17510—4	1	1	1	1	1	1	9	11	22.3	38.7	6	10.31	3.31	4.31	4.03	5.09	2.49	3.03	3.1	4.4	8.7	12	2.2	3.1	0	0	0	0	0	1	1	2	0	2	3	1	1	3	3	0	0	0	0	1
Rosa sericea	Tibet, Yadong	27.4193	88.9365	2812.06	GAOXF-17510—5	1	1	1	1	1	1	9	13	35	52.1	12.1	17.88	4.01	6.09	5.91	8.03	3.5	4.2	4.1	13	9.8	11	2.5	3.3	0	0	0	0	0	2	1	2	0	2	3	2	1	2	2	0	0	0	0	1
Rosa sericea	Tibet, Yadong	27.4191	88.9364	2816.82	GAOXF-17510—6	1	1	1	1	1	1	7	11	27.87	63.4	8.5	14.61	3.43	5.11	4.21	7.62	3.11	3.57	7.1	12.8	3.4	12.9	2.3	5.7	0	0	0	0	0	2	0	2	0	2	3	1	1	2	2	0	0	0	0	1
Rosa sericea	Tibet, Yadong	27.4197	88.9358	2811.31	GAOXF-17510—7	1	1	1	1	1	1	7	11	15.4	57.5	8.5	16.3	3.49	5.54	4.21	7.19	2.78	4.51	7.6	12.3	4.5	13	3.1	3.2	0	0	0	0	0	2	0	2	0	2	3	1	1	2	2	0	0	0	0	1
Rosa sericea	Tibet, Yadong	27.4219	88.9323	2820.93	GAOXF-17510—8	1	1	1	1	1	1	7	11	17	74	17.4	29.34	6.32	9.8	6.08	12.28	8.23	9.78	5.6	14.5	7.5	12.3	2.3	4.3	0	0	0	0	0	2	1	2	0	2	3	2	1	3	3	0	0	0	0	1
Rosa sericea	Tibet, Yadong	27.4433	88.92	2931.05	GAOXF-17510—9	1	1	1	1	1	1	7	11	27.3	68.3	8.5	12.3	3.03	4.59	5.04	7.09	2.56	3.03	5.1	11.7	9.1	12	2.8	3.4	0	0	0	0	0	1	0	2	0	2	3	2	0	3	3	0	0	0	0	1
Rosa sericea	Tibet, Yadong	27.4431	88.9201	2931.01	GAOXF-17510—10	1	1	1	1	1	1	7	11	23.3	33.41	7.6	10.51	2.75	4.11	5.21	6.69	2	2.5	5.7	14.9	7.4	12.2	2.5	4.8	0	0	0	0	0	1	0	2	0	2	3	2	0	3	3	0	0	0	0	1
Rosa sericea	Tibet, Yadong	27.5067	88.9465	3088.38	GAOXF-17512—1	1	1	1	1	1	1	9	13	23.5	75.43	9.87	15.67	6.07	9.1	5	8	3	4.5	7	24	6	13	2.9	4.5	0	0	0	0	0	1	0	2	0	2	2	3	0	4	4	0	0	0	0	1
Rosa sericea	Tibet, Yadong	27.5068	88.9468	3087.95	GAOXF-17512—2	1	1	1	1	1	1	9	13	35	50.13	8.91	14.34	5.46	6.34	6	9	3.5	4	6.4	23.2	4.9	13.1	2.4	5.2	0	0	0	0	0	1	0	2	0	2	2	3	0	4	4	0	0	0	0	1
Rosa sericea	Tibet, Yadong	27.5063	88.9468	3089.8	GAOXF-17512—3	1	1	1	1	1	1	7	13	33	71.12	8.13	15.34	5.21	7.87	5	12	2	4	5.1	34	5.7	15.8	2.6	5.8	0	0	0	0	0	1	0	2	0	2	2	3	1	4	4	0	0	0	0	1
Rosa sericea	Tibet, Yadong	27.5068	88.9471	3094.88	GAOXF-17512—4	1	1	1	1	1	1	9	13	34.2	55.6	9.9	14.01	5.43	7.65	5	7	3	4	12	15	9	10	2.34	4.5	0	0	0	0	0	0	0	2	0	2	2	3	1	4	4	0	0	0	0	1
Rosa sericea	Tibet, Yadong	27.5068	88.947	3094.83	GAOXF-17512—5	1	1	1	1	1	1	7	13	27	60.07	10.1	15.12	4.89	7.43	6	10	3	4	6	14	11	13	2.21	5.12	0	0	0	0	0	0	0	2	0	2	2	3	1	4	4	0	0	0	0	1
Rosa sericea	Tibet, Yadong	27.507	88.9464	3092.19	GAOXF-17512—6	1	1	1	1	1	1	9	13	25	58.66	10.23	14.54	5.21	7.77	5	10	3	4	13	15	11	12.4	4	4.48	0	0	0	0	0	2	0	2	0	2	2	3	1	4	4	0	0	0	0	1
Rosa sericea	Tibet, Yadong	27.5076	88.9454	3086.48	GAOXF-17512—7	1	1	1	1	1	1	7	11	20	50.45	8.13	15.43	4.56	6.21	5	9	3	4	7	10	10	13.5	2	3	0	0	0	0	0	2	0	2	0	2	2	4	1	4	4	1	1	1	1	1
Rosa sericea	Tibet, Yadong	27.508	88.9466	3094.64	GAOXF-17512—8	1	1	1	1	1	1	9	13	35	54.34	9.12	15	4.06	7.23	5	8	2.5	4	9	13	10	15.1	2.21	5	0	0	0	0	0	0	0	2	0	2	2	4	1	4	4	1	1	1	1	1
Rosa sericea	Tibet, Yadong	27.508	88.9467	3098.07	GAOXF-17512—9	1	1	1	1	1	1	7	13	20	50.21	9	16.01	3.98	6.76	5	12.21	3	4	11	13	8	10	3.5	4	0	0	0	0	0	0	0	2	0	2	2	3	1	4	4	1	1	1	1	1
Rosa sericea	Tibet, Yadong	27.5075	88.9465	3096.81	GAOXF-17512—10	1	1	1	1	1	1	9	13	50	73.42	9.78	15.45	6	9.71	5	8	3	4.5	9	10	8	11.2	4.5	6	0	0	0	0	0	1	0	2	0	2	2	3	1	4	4	1	1	1	1	1
Rosa sericea	Tibet, Yadong	27.5486	89.001	3455.09	GAOXF-17513—1	1	1	1	1	1	1	9	13	35	50.45	10.23	15.24	5.34	8.7	6	9.87	3.5	4	10	11	8	13.2	4	5.1	0	0	0	0	0	1	0	2	0	2	2	3	1	4	4	1	1	1	1	1
Rosa sericea	Tibet, Yadong	27.5486	89.0011	3457.27	GAOXF-17513—2	1	1	1	1	1	1	7	13	33	70.54	8.81	15.34	4.21	7.23	5	12	2	4	4.8	31	8.7	19.3	2.3	4.2	0	0	0	0	0	1	0	2	0	2	2	3	0	4	4	1	1	1	1	1
Rosa sericea	Tibet, Yadong	27.5486	89.0013	3461.2	GAOXF-17513—3	1	1	1	1	1	1	9	13	40	55.34	9.81	14.56	5.34	7.32	5	7	3	4	12	15	9	10	2.26	4.5	0	0	0	0	0	0	0	2	0	2	2	3	0	4	4	1	1	1	1	1
Rosa sericea	Tibet, Yadong	27.5485	89.0013	3462.58	GAOXF-17513—4	1	1	1	1	1	1	7	13	27	60.54	11	14.32	4.12	6.81	6	13.21	3	4	6.8	21	7	14	2.6	3.9	0	0	0	0	0	0	0	2	0	2	2	3	0	4	4	1	1	1	1	1
Rosa sericea	Tibet, Yadong	27.5484	89.0013	3462.89	GAOXF-17513—5	1	1	1	1	1	1	9	13	25	65.43	9.87	15.43	5.43	7.87	5	10	3	4	7.1	26	6.8	15.1	2.4	4.3	0	0	0	0	0	2	0	2	0	2	2	3	0	4	4	1	1	1	1	1
Rosa sericea	Tibet, Yadong	27.5484	89.0013	3465.79	GAOXF-17513—6	1	1	1	1	1	1	7	13	20.03	50	8.72	14.56	4.57	7.87	5	9	3	4	7.23	12.34	10	13.12	2.12	3.42	0	0	0	0	0	2	0	2	0	2	2	4	0	4	4	1	1	1	1	1
Rosa sericea	Tibet, Yadong	27.5485	89.0009	3460.96	GAOXF-17513—7	1	1	1	1	1	1	9	13	33.45	53.53	8.97	14.34	4.56	8.32	5	8	2.5	4	9	13.76	9.8	12	3	5	0	0	0	0	0	0	0	2	0	2	2	4	0	4	4	1	1	1	1	1
Rosa sericea	Tibet, Yadong	27.5482	89.0003	3445.2	GAOXF-17513—8	1	1	1	1	1	1	7	13	20	50.98	9	14.51	5.43	8.87	5	8	3	4	11	12.98	8.8	10	3.5	4.2	0	0	0	0	0	0	0	2	0	2	2	3	0	4	4	1	1	1	1	1
Rosa sericea	Tibet, Yadong	27.5476	88.9995	3453.34	GAOXF-17513—9	1	1	1	1	1	1	9	13	23.45	55.41	12	15.41	5.46	9.34	5	8	3	4	13	14	8	10	3.8	4.3	0	0	0	0	0	0	0	2	0	2	2	2	0	4	4	1	1	1	1	1
Rosa sericea	Tibet, Yadong	27.5477	88.9998	3452.21	GAOXF-17513—10	1	1	1	1	1	1	9	13	20	60.23	9	15.09	4.5	8.9	5	10	3	4	10	13	9	12	3.5	4.4	0	0	0	0	0	0	0	2	0	2	2	2	0	4	4	0	0	0	0	1
Rosa sericea	Tibet, Yadong	27.5079	88.9514	3232.9	GAOXF-17514—1	1	1	1	1	1	1	7	9	20.34	39.45	7.08	12.34	4.51	7.54	4	5	2.5	3	6	8	6	7	2.5	3.39	0	0	0	0	0	0	0	2	0	2	2	1	1	4	4	0	0	0	0	1
Rosa sericea	Tibet, Yadong	27.5081	88.9515	3233.99	GAOXF-17514—2	1	1	1	1	1	1	7	11	21.21	35.46	8.11	13	5.32	7.82	5	6	2.5	3	9	11	7	8	3	3.5	0	0	0	0	0	0	0	2	0	2	2	1	1	4	4	0	0	0	0	1
Rosa sericea	Tibet, Yadong	27.5082	88.9534	3235.11	GAOXF-17514—3	1	1	1	1	1	1	9	11	25	35	8.91	13.24	5.34	8.93	4	5	2.5	3	9	12	10	11	2	2.5	0	0	0	0	0	0	0	2	0	2	2	1	1	4	4	0	0	0	0	1
Rosa sericea	Tibet, Yadong	27.508	88.9532	3243.09	GAOXF-17514—4	1	1	1	1	1	1	7	13	25	45	8.71	13.65	4.65	8.76	5	8	2.5	3.5	3.4	17.1	7.1	14.7	3.2	4.4	0	0	0	0	0	1	3	2	0	2	2	1	1	3	3	0	0	0	0	1
Rosa sericea	Tibet, Yadong	27.5079	88.9529	3243.07	GAOXF-17514—5	1	1	1	1	1	1	7	11	20.34	33.23	7.39	10.38	5.46	8.98	2	6	2.53	3.56	4.1	17	7.6	14.6	3.1	4	0	0	0	0	0	0	0	2	0	2	2	3	1	3	3	0	0	0	0	1
Rosa sericea	Tibet, Yadong	27.5079	88.9529	3240.96	GAOXF-17514—6	1	1	1	1	1	1	7	13	21.34	35	7.34	11.23	4.67	7.54	3	5	2	3	8.7	23.4	7.2	14.2	2.9	3.7	0	0	0	0	0	1	0	2	0	2	2	2	1	4	4	2	2	2	2	1
Rosa sericea	Tibet, Yadong	27.5084	88.9521	3232.98	GAOXF-17514—7	1	1	1	1	1	1	7	13	22.21	40	10.23	14.32	5.67	8.76	5	9	3	5	10.23	12.34	7	8.91	2.2	2.29	0	0	0	0	0	1	3	2	0	2	2	0	1	1	1	2	2	2	2	1
Rosa sericea	Tibet, Yadong	27.5092	88.9523	3225.99	GAOXF-17514—8	1	1	1	1	1	1	7	11	20.09	37.65	9.71	13.24	4.56	4.98	6	8	2.98	3.45	9.8	13.23	7	8	1.52	2.3	0	0	0	0	0	1	0	2	0	2	2	0	0	3	3	0	0	0	0	1
Rosa sericea	Tibet, Yadong	27.5093	88.9522	3230.55	GAOXF-17514—9	1	1	1	1	1	1	7	11	21.34	41.23	8.73	11.23	4.34	5.6	4	6	2	3	11	10.23	9	11	1.7	2	0	0	0	0	0	0	0	2	0	2	2	2	0	3	3	0	0	0	0	1
Rosa sericea	Tibet, Yadong	27.5093	88.9522	3232.81	GAOXF-17514—10	1	1	1	1	1	1	7	13	35.43	56.45	9.81	14.32	5.67	8.74	5	10	2.5	5.5	8.76	13.45	11	13	2	2.3	0	0	0	0	0	1	0	2	0	2	2	2	0	4	4	4	4	4	4	1
Rosa sericea	Tibet, Jilong	28.7804	85.2998	3955.38	GAOXF-17538—1	1	1	1	1	1	1	7	13	20.98	39.91	8.34	14.32	4.65	8.74	5	8	3	4	9.1	24.1	7.3	13.9	2.6	4	0	0	0	0	0	0	0	2	0	2	2	3	0	4	4	4	4	4	4	1
Rosa sericea	Tibet, Jilong	28.7804	85.2999	3959.5	GAOXF-17538—2	1	1	1	1	1	1	9	13	29.98	45.65	8.7	13.58	4.97	8.9	3	5	2	2.5	11	13.45	9.34	11.2	2.5	3.45	0	0	0	0	0	0	0	2	0	2	2	0	0	3	3	0	0	0	0	1
Rosa sericea	Tibet, Jilong	28.7808	85.3026	3950.62	GAOXF-17538—3	1	1	1	1	1	1	7	11	20.34	31.34	9	13.12	5.6	7.81	4	6	2	2.5	9.45	13.45	6.45	7.65	2	3.39	0	0	0	0	0	0	0	2	0	2	2	1	0	3	3	0	0	0	0	1
Rosa sericea	Tibet, Jilong	28.7809	85.3024	3958.73	GAOXF-17538—4	1	1	1	1	1	1	7	11	21.34	25.43	7.81	17.87	5.32	7.65	4	5	2.5	3	6.54	8.34	6.12	7.89	2.5	3.12	0	0	0	0	0	0	0	2	0	2	2	1	0	4	4	0	0	0	0	1
Rosa sericea	Tibet, Jilong	28.781	85.3025	3957.72	GAOXF-17538—5	1	1	1	1	1	1	7	11	23.45	35.56	8.09	19.56	4.78	9.71	5	6	2.5	3	9	12	7	8.6	2.23	3.53	0	0	0	0	0	0	0	2	0	2	2	1	2	4	4	1	1	1	1	1
Rosa sericea	Tibet, Jilong	28.7811	85.3026	3972.57	GAOXF-17538—6	1	1	1	1	1	1	9	13	24.54	45.67	9.87	14.32	5.46	6.43	4	5	2.5	3	8.7	12	10	11.34	2	2.5	0	0	0	0	0	0	0	2	0	2	2	1	2	4	4	0	0	0	0	1
Rosa sericea	Tibet, Jilong	28.7811	85.3028	3966.1	GAOXF-17538—7	1	1	1	1	1	1	7	13	25.43	67.34	8.71	13.21	4.89	6.98	5	8	2.5	3.5	9	12	10.21	11	2	3.39	0	0	0	0	0	1	3	2	0	2	2	1	2	3	3	0	0	0	0	1
Rosa sericea	Tibet, Jilong	28.7811	85.3029	3966.38	GAOXF-17538—8	1	1	1	1	1	1	7	13	19.89	47.65	7.32	10.13	4.56	7.53	2	6	1.98	3.23	8.9	24.2	7.7	14.9	2.1	2.7	0	0	0	0	0	0	0	2	0	2	2	3	2	3	3	0	0	0	0	1
Rosa sericea	Tibet, Jilong	28.7809	85.3027	3959.73	GAOXF-17538—9	1	1	1	1	1	1	7	13	24.35	37.65	7	14.56	5.64	6.75	3	5	2	3	7.89	12.34	7.56	8.65	2.21	3.31	0	0	0	0	0	1	0	2	0	2	2	2	2	4	4	2	2	2	2	1
Rosa sericea	Tibet, Jilong	28.7809	85.3027	3960.48	GAOXF-17538—10	1	1	1	1	1	1	5	13	20	41.21	9.87	15.43	5.49	7.87	5	9	3	5	10	12	7	8	2.2	3.35	0	0	0	0	0	1	3	2	0	2	2	0	2	1	1	2	2	2	2	1
Rosa sericea	Tibet, Jilong	28.4341	85.2568	2919.29	GAOXF-17539—1	1	1	1	1	1	1	7	13	23.21	45.23	9.87	20.32	4.59	8.32	6	8	2.08	3.52	8.9	21.2	8.1	13	1.8	2.5	0	0	0	0	0	1	0	2	0	2	2	0	2	3	3	0	0	0	0	1
Rosa sericea	Tibet, Jilong	28.4342	85.2571	2914.45	GAOXF-17539—2	1	1	1	1	1	1	7	13	30.45	67.43	7.89	23.45	4.67	6.43	4	6	2	3	17.7	41.6	7	14	1.9	2.8	0	0	0	0	0	0	0	2	0	2	2	2	2	3	3	0	0	0	0	1
Rosa sericea	Tibet, Jilong	28.4341	85.2573	2923.08	GAOXF-17539—3	1	1	1	1	1	1	7	13	27	51.32	11	27.78	5.63	8.93	5	10	2.5	5.5	15.3	33.4	8.7	13	2	3.2	0	0	0	0	0	1	0	2	0	2	2	2	2	4	4	4	4	4	4	1
Rosa sericea	Tibet, Jilong	28.4348	85.2575	2929.48	GAOXF-17539—4	1	1	1	1	1	1	7	11	30.3	45.4	8	13.34	4.95	6.13	5	8	3	4	10	12	11	13	2	2.3	0	0	0	0	0	0	0	2	0	2	2	3	2	4	4	4	4	4	4	1
Rosa sericea	Tibet, Jilong	28.435	85.2579	2923.76	GAOXF-17539—5	1	1	1	1	1	1	9	13	12.5	39.4	8	11	4.54	6.53	3	5	2	2.5	11	13	9	10	2.5	2.5	0	0	0	0	0	0	0	2	0	2	2	0	2	3	3	2	2	2	2	1
Rosa sericea	Tibet, Jilong	28.4357	85.2569	2922.22	GAOXF-17539—6	1	1	1	1	1	1	7	11	21.12	32.45	9	12	4.93	6.76	4	6	2	2.5	9	10	6.21	7.7	1.91	2.29	0	0	0	0	0	0	0	2	0	2	2	1	2	3	3	0	0	0	0	1
Rosa sericea	Tibet, Jilong	28.436	85.257	2923.64	GAOXF-17539—7	1	1	1	1	1	1	9	13	28.92	56.3	9	13.21	4.53	6.89	5	6	2	3	7	11	6	7	2.5	2.5	0	0	0	0	0	0	0	2	0	2	2	1	2	3	3	1	1	1	1	1
Rosa sericea	Tibet, Jilong	28.4361	85.2571	2929.5	GAOXF-17539—8	1	1	1	1	1	1	7	13	21.3	54.4	7.83	11.23	3.89	6.78	2	6	2.98	3.67	3	4	7	8.65	1.2	2.34	0	0	0	0	0	0	0	2	0	2	2	3	2	3	3	0	0	0	0	1
Rosa sericea	Tibet, Jilong	28.4359	85.2574	2926.13	GAOXF-17539—9	1	1	1	1	1	1	7	13	27.43	65.43	7.86	12.34	4.89	8.79	3	5	2	3	10	12	6.34	8.66	2.2	2.5	0	0	0	0	0	1	0	2	0	2	2	2	0	4	4	2	2	2	2	1
Rosa sericea	Tibet, Jilong	28.4359	85.2575	2927.29	GAOXF-17539—10	1	1	1	1	1	1	9	13	28.76	56.43	8.71	14.45	4.87	7.97	5	9	3	5	10	12	6.7	8	2.2	2.5	0	0	0	0	0	1	3	2	0	2	2	0	0	1	1	2	2	2	2	1
Rosa omeiensis	Tibet, Jilong	28.4901	85.2225	3167.12	GAOXF-17540—1	2	2	1	1	1	1	7	15	21.98	39.82	6.7	10.82	3.82	5.64	3.94	5.67	2.94	4.32	5	13.4	5	6	1.89	3.2	0	0	0	0	0	1	0	2	0	2	1	2	1	3	3	0	0	0	0	0
Rosa omeiensis	Tibet, Jilong	28.4899	85.2226	3172.39	GAOXF-17540—2	2	2	1	1	1	1	9	17	25.43	57.64	8.23	25.34	4.32	6.72	4.67	6.32	2.78	4.53	8	14.6	7	8	1.9	2.25	0	0	0	0	0	0	0	2	0	2	1	3	0	3	3	0	0	0	0	0
Rosa omeiensis	Tibet, Jilong	28.4878	85.222	3160.83	GAOXF-17540—3	2	2	1	1	1	0	7	17	23.21	67.34	7.65	28.45	3.97	4.87	3.78	8.92	3.11	4.21	5	17.8	7	9	2	2.5	0	0	0	0	0	0	0	2	0	2	1	2	0	3	3	1	1	1	1	0
Rosa omeiensis	Tibet, Jilong	28.4879	85.2221	3155.62	GAOXF-17540—4	2	2	1	1	1	0	9	17	30.23	55.67	8.92	19.78	3.59	5.98	4.21	6.43	2.03	3.12	15.9	19.8	6	20.5	2.7	4.6	0	0	0	0	0	1	0	2	0	2	1	2	0	2	2	1	1	1	1	0
Rosa omeiensis	Tibet, Jilong	28.4886	85.2222	3164.4	GAOXF-17540—5	2	2	1	1	1	0	9	15	30.12	44.56	9.23	14.32	4.21	6.32	4.09	14.32	2.98	4.21	21.5	29.2	8.3	15	2.4	5.5	0	0	0	0	0	2	0	2	0	2	1	2	1	2	2	0	0	0	0	0
Rosa omeiensis	Tibet, Jilong	28.4918	85.2231	3197.25	GAOXF-17540—6	2	2	1	1	1	0	7	17	21.23	39.87	8.12	14.32	4.32	5.98	4.11	9.34	2.5	3.54	8.6	18.3	11.6	17.6	2.3	4.9	0	0	0	0	0	2	0	2	0	2	1	2	0	3	3	0	0	0	0	0
Rosa sericea	Tibet, Jilong	28.4918	85.2232	3197.95	GAOXF-17540—7	1	1	1	1	1	1	7	11	30	45	10	14.32	4	6	4	8	2.5	3.5	12.2	20.9	9.7	13.6	3.3	4.7	0	0	0	0	0	0	0	2	0	2	2	3	0	3	3	3	3	3	3	1
Rosa sericea	Tibet, Jilong	28.4921	85.2229	3194.1	GAOXF-17540—8	1	1	1	1	1	1	9	13	25	40	9	12	3	4.5	4	6	2	2.5	11.4	24.6	9.4	16.4	2.8	3.7	0	0	0	0	0	0	0	2	0	2	2	3	2	4	4	1	1	1	1	1
Rosa sericea	Tibet, Jilong	28.4921	85.2228	3196.69	GAOXF-17540—9	1	1	1	1	1	1	7	13	27	50	10	13	4	7	4	7	2	3	7.9	17.9	9.1	13.6	2.4	2.8	0	0	0	0	0	1	0	2	0	2	2	2	0	2	2	0	0	0	0	1
Rosa omeiensis	Tibet, Jilong	28.4921	85.2227	3198.26	GAOXF-17540—10	2	2	1	1	1	0	7	15	21.34	54.32	6.97	11.23	3.89	4.56	3.46	5.21	2.49	3.21	8	22.8	9.5	16.8	2.3	3.5	0	0	0	0	0	0	0	2	0	2	1	2	0	3	3	2	2	2	2	0
Rosa omeiensis	Tibet, Jilong	28.5143	85.2171	3335.99	GAOXF-17542—1	2	2	1	1	1	0	9	17	35.32	59.43	9.21	15.23	3.54	5.67	4.12	6.45	3.12	4.56	16	19.1	7.4	21	2.8	4.3	0	0	0	0	0	1	0	2	0	2	1	2	0	2	2	0	0	0	0	0
Rosa omeiensis	Tibet, Jilong	28.5142	85.2174	3340.66	GAOXF-17542—2	2	2	1	1	1	0	9	17	29.34	49.87	9.03	14.05	4.12	6.23	4.09	6.23	2.79	5.32	10.8	16.5	6.3	20.8	2.9	3.9	0	0	0	0	0	2	0	2	0	2	1	2	1	2	2	0	0	0	0	0
Rosa omeiensis	Tibet, Jilong	28.514	85.2173	3339.84	GAOXF-17542—3	2	2	1	1	1	0	7	13	23.3	69.45	8.23	13.45	2.56	3.98	4.13	7.87	4.12	6.11	10.1	17.3	9.1	21.1	2.3	2.9	0	0	0	0	0	2	0	2	0	2	1	2	0	3	3	1	1	1	1	0
Rosa omeiensis	Tibet, Jilong	28.5142	85.217	3345.15	GAOXF-17542—4	2	2	1	1	1	1	9	17	22.23	65.45	8.34	12.12	3.08	4.56	4.12	7.87	2.98	4.68	6.54	12.34	7.3	9.12	2.6	3.43	0	0	0	0	0	1	0	2	0	2	1	3	0	3	3	0	0	0	0	0
Rosa omeiensis	Tibet, Jilong	28.5151	85.217	3341.27	GAOXF-17542—5	2	2	1	1	1	0	9	15	50.23	67.56	8.76	15.65	5.34	6.23	7.09	12.34	3.12	5.13	10.23	14.56	6.12	8.98	2.28	3.49	0	1	0	0	0	0	0	2	0	2	1	1	0	1	1	0	0	0	0	0
Rosa omeiensis	Tibet, Jilong	28.515	85.2171	3327.03	GAOXF-17542—6	2	2	1	1	1	0	9	15	51.2	75	8.97	13.45	5.52	7.23	8.15	10.92	4.67	6.08	11	14.5	7	8	3.5	3.49	0	1	0	0	0	0	0	2	0	2	1	1	0	1	1	1	1	1	1	0
Rosa omeiensis	Tibet, Jilong	28.5151	85.2172	3338.14	GAOXF-17542—7	2	2	1	1	1	0	9	17	24.54	58.54	9.54	14.56	5.12	5.58	5.32	7.87	3.45	5.44	6	8	6	7.9	2.5	3.35	0	1	0	0	0	0	0	2	0	2	1	1	2	1	1	0	0	0	0	0
Rosa omeiensis	Tibet, Jilong	28.5154	85.2171	3337.91	GAOXF-17542—8	2	2	1	1	1	0	9	17	26.34	49.87	8.75	14.67	2.54	4.56	4	7.05	2.78	3.45	5.4	7	7	14.43	3	3.2	0	1	0	0	0	0	0	2	0	2	1	1	2	2	2	0	0	0	0	0
Rosa omeiensis	Tibet, Jilong	28.5156	85.2173	3342.63	GAOXF-17542—9	2	2	1	1	1	0	7	17	25.43	78.43	9.87	14.56	4.53	8.34	6	9.87	3.11	6.78	10	19	7	12.34	2.2	3	0	1	0	0	0	0	0	2	0	2	1	1	2	1	1	1	1	1	1	0
Rosa omeiensis	Tibet, Jilong	28.5155	85.2174	3345.75	GAOXF-17542—10	2	2	1	1	1	1	9	17	21.34	46.87	8.81	18.76	3.97	6.32	4.53	7.88	2.78	4.59	6	9	7.8	10.23	2.8	3.33	0	1	0	0	0	0	0	2	0	2	1	2	2	2	2	0	0	0	0	0
Rosa omeiensis	Tibet, Jilong	28.3716	85.3279	2749.6	GAOXF-17543—4	2	2	1	1	1	0	9	15	28.76	72.34	9.78	14.32	5.59	7.89	7.65	11.12	4	4.5	5.8	25.4	8.8	17.3	2.4	3.7	0	1	0	0	0	1	0	2	0	2	1	2	0	1	1	0	0	0	0	0
Rosa omeiensis	Tibet, Jilong	28.3716	85.3279	2754.92	GAOXF-17543—5	2	2	1	1	1	0	9	17	40.21	75.65	9.45	14.53	6.52	8.59	7.86	12.45	4.5	6	5.7	19.8	7.6	15.3	2.1	4.3	0	1	0	0	0	1	0	2	0	2	1	3	1	1	1	1	1	1	1	0
Rosa omeiensis	Tibet, Jilong	28.3716	85.3282	2751.87	GAOXF-17543—6	2	2	1	1	1	0	11	17	35.43	63.21	9.76	14.56	4.56	6.87	4.86	9.81	3	4.5	6.45	17.43	6.78	8.91	2.8	3.2	0	1	0	0	0	1	0	2	0	2	1	3	0	1	1	0	0	0	0	0
Rosa sericea	Tibet, Jilong	28.3969	85.3541	2751.14	GAOXF-17559—1	1	1	1	1	1	1	7	13	20.5	45.61	9.78	11.58	4.08	5.68	5	7	2	2.5	10.4	35	6.7	19.1	2.3	3.7	0	0	0	0	0	0	0	2	0	2	2	2	0	4	4	0	0	0	0	1
Rosa sericea	Tibet, Jilong	28.3969	85.3542	2742.31	GAOXF-17559—2	1	1	1	1	1	1	9	13	33.23	56.78	9.87	14	5	7.5	6	8	3	4	10.6	26	6.1	18.1	2.1	2.9	0	0	0	0	0	0	0	2	0	2	2	4	1	4	4	2	2	2	2	1
Rosa sericea	Tibet, Jilong	28.3971	85.3544	2746.94	GAOXF-17559—3	1	1	1	1	1	1	9	11	27.34	65.34	8.76	13.21	5.12	8.7	6	9	3	4	10.3	32	7.5	18.7	2.2	3.4	0	0	0	0	0	0	0	2	0	2	2	3	0	4	4	0	0	0	0	1
Rosa sericea	Tibet, Jilong	28.397	85.3546	2743.96	GAOXF-17559—4	1	1	1	1	1	1	9	13	23.45	75.32	7.85	14.21	6	8.76	5	8	3	4.5	9	10	8	9	4.5	6	0	0	0	0	0	1	0	2	0	2	2	3	0	4	4	0	0	0	0	1
Rosa sericea	Tibet, Jilong	28.3973	85.3549	2744.84	GAOXF-17559—5	1	1	1	1	1	1	9	13	35	50.12	7.65	12.34	5	7.73	6	9	3.5	4	10	11	8	9	4	5	0	0	0	0	0	1	0	2	0	2	2	3	0	4	4	4	4	4	4	1
Rosa sericea	Tibet, Jilong	28.3996	85.3592	2791.32	GAOXF-17559—6	1	1	1	1	1	1	7	13	25.43	70.13	8.73	14.32	4.32	7.59	5	8.32	2	4	7	11	11	13	3.5	4.5	0	0	0	0	0	1	0	2	0	2	2	3	0	4	4	0	0	0	0	1
Rosa sericea	Tibet, Jilong	28.6448	85.2698	3733.56	GAOXF-17561—1	1	1	1	1	1	1	7	11	28.9	53.9	8.91	22.34	5.34	6.71	5.04	8.09	2.78	4.31	8.3	21.3	9.4	17.2	2.4	5.8	0	0	0	0	0	0	0	2	0	2	2	3	0	4	4	0	0	0	0	1
Rosa sericea	Tibet, Jilong	28.6448	85.2696	3737.33	GAOXF-17561—2	1	1	1	1	1	1	7	11	27.12	61.12	11	23.43	4.56	6.54	6	7.86	3	4	7.5	21.1	7.3	18.1	2.1	4.8	0	0	0	0	0	0	0	2	0	2	2	3	0	4	4	0	0	0	0	1
Rosa sericea	Tibet, Jilong	28.6447	85.2694	3738.71	GAOXF-17561—3	1	1	1	1	1	1	9	13	23.41	59.12	10.12	14.34	5.43	7.45	5	7.65	3	4	7.5	21.1	7.3	18.1	2.1	4.8	0	0	0	0	0	2	0	0	0	0	2	3	0	4	4	3	3	3	3	1
Rosa sericea	Tibet, Jilong	28.6446	85.2694	3733.83	GAOXF-17561—4	1	1	1	1	1	1	7	13	20.11	50.12	8	13.4	4.65	7.8	5	8.74	3	4	8.9	23	9.6	16.1	2.7	5.3	0	0	0	0	0	2	0	0	0	0	2	4	0	4	4	0	0	0	0	1
Rosa sericea	Tibet, Jilong	28.6447	85.2694	3735.32	GAOXF-17561—5	1	1	1	1	1	1	9	13	31.23	51.23	10	15	3.5	5.68	5	7.33	2.5	4	9	13	10	12	3	5	0	0	0	0	0	0	0	0	0	0	2	4	1	4	4	1	1	1	1	1
Rosa sericea	Tibet, Jilong	28.6448	85.2693	3748.95	GAOXF-17561—6	1	1	1	1	1	1	7	13	20	53.2	9	14.32	3.5	7.85	5	8	3	4	11	13	8	12.1	3.5	4.3	0	0	0	0	0	0	0	0	0	0	2	3	1	4	4	1	1	1	1	1
Rosa sericea	Tibet, Jilong	28.6446	85.2691	3741.96	GAOXF-17561—7	1	1	1	1	1	1	9	13	21.88	55.34	9.87	16.54	5	8.32	5	8	3	4	13	14	8	10	3.8	4	0	0	0	0	0	0	0	0	0	0	2	2	1	4	4	2	2	2	2	1
Rosa sericea	Tibet, Jilong	28.6446	85.2703	3728.94	GAOXF-17561—8	1	1	1	1	1	1	9	11	20.11	61.23	9	15.43	3	5.5	5	9.12	3	4	10	13	9.8	13.1	3.5	4.43	0	0	0	0	0	0	0	0	0	0	2	2	0	4	4	1	1	1	1	1
Rosa sericea	Tibet, Jilong	28.6445	85.2699	3731.01	GAOXF-17561—9	1	1	1	1	1	1	9	13	41.23	55.34	9.87	15.05	5	7.85	5	7	3	4	12	15	9	10.5	4	4.49	0	0	0	0	0	0	0	0	0	0	2	3	1	4	4	1	1	1	1	1
Rosa sericea	Tibet, Jilong	28.6457	85.2725	3737.41	GAOXF-17561—10	1	1	1	1	1	1	7	13	27.43	61.23	11	14.32	4.52	8.32	6	8.32	3	4	6	14	11	13	4	4.5	0	0	0	0	0	0	0	0	0	0	2	3	0	4	4	0	0	0	0	1
Rosa omeiensis	Tibet, Jilong	28.554	85.2411	3580.76	GAOXF-17562—1	2	2	1	1	1	1	9	17	40.12	75.32	10	14.32	5.65	7.45	5	11.23	3.5	5.5	15	20	11	12	4	5	0	1	0	0	0	1	0	2	0	2	1	2	0	1	1	0	0	0	0	0
Rosa omeiensis	Tibet, Jilong	28.5536	85.2409	3591.56	GAOXF-17562—2	2	2	1	1	1	0	7	15	25.45	65.23	9.8	14.32	4.98	7.21	6	10	3.5	4.5	7.3	33	4.3	15.7	3.1	5.4	0	1	0	0	0	0	0	2	0	2	1	1	0	1	1	0	0	0	0	0
Rosa omeiensis	Tibet, Jilong	28.5536	85.2409	3592.44	GAOXF-17562—3	2	2	1	1	1	1	7	17	30.11	60.12	9	23.43	4.88	8.72	5	9	3	4.5	12	16	10	12	3.5	4	0	1	0	0	0	0	0	2	0	2	1	1	1	1	1	0	0	0	0	0
Rosa omeiensis	Tibet, Jilong	28.5535	85.241	3593.75	GAOXF-17562—4	2	2	1	1	1	0	7	15	35.23	55.43	9	21.21	5	8.74	5	7.74	3	5.23	11	12	13	14	5	5.5	0	1	0	0	0	0	0	2	0	2	1	1	1	1	1	1	1	1	1	0
Rosa omeiensis	Tibet, Jilong	28.5535	85.241	3592.69	GAOXF-17562—5	2	2	1	1	1	0	9	17	28	61.65	8	20.1	4.67	9.43	5	7.94	2.5	4.56	7.1	33.6	4.6	16.7	4.1	6.4	0	1	0	0	0	0	0	2	0	2	1	1	1	2	2	0	0	0	0	0
Rosa omeiensis	Tibet, Jilong	28.5534	85.241	3596.03	GAOXF-17562—6	2	2	1	1	1	0	7	15	25.34	46.54	6	17.87	4.56	6.32	5	8.12	3.5	4.87	7.2	32	3.9	16	3.1	5.3	0	1	0	0	0	0	0	2	0	2	1	0	1	0	0	0	0	0	0	0
Rosa omeiensis	Tibet, Jilong	28.5535	85.2412	3599.16	GAOXF-17562—7	2	2	1	1	1	0	7	15	30	43.23	8	13.45	4.5	7.83	4	8	3	5.45	6	14.3	6.7	9.87	2.5	3.1	0	0	0	0	0	0	0	2	0	2	1	0	1	0	0	0	0	0	0	0
Rosa omeiensis	Tibet, Jilong	28.5535	85.2414	3596.29	GAOXF-17562—8	2	2	1	1	1	1	7	17	20	39.45	7	15.43	5.31	7.64	4	7.86	3	4.56	7	8	9	10	2.23	3.9	0	0	0	0	0	0	0	2	0	2	1	0	1	4	4	1	1	1	1	0
Rosa omeiensis	Tibet, Jilong	28.5536	85.2415	3596.87	GAOXF-17562—9	2	2	1	1	1	0	7	17	25	65.34	7	19.45	5.64	8.97	5	9.34	3	4.87	11	12	11	12	2.24	3.3	0	0	0	0	0	0	0	2	0	2	1	0	1	0	0	1	1	1	1	0
Rosa omeiensis	Tibet, Jilong	28.5538	85.2415	3593	GAOXF-17562—10	2	2	1	1	1	0	7	15	20	49.78	5	25.43	4.87	9.12	4.5	7.45	3.54	5.64	5	7	7	8	2	3.5	0	0	0	0	0	0	0	2	0	2	1	0	0	0	0	0	0	0	0	0
Rosa sericea	Tibet, Lhasa	29.7364	91.154	3880.1	GAOXF-17571—1	1	1	1	1	1	1	7	13	21.34	39.78	9	12.34	4	5.43	5.43	7.12	3.21	4.57	7	36	3	15	3	6	0	0	0	0	0	0	0	2	0	2	2	2	1	4	4	0	0	0	0	1
Rosa sericea	Tibet, Lhasa	29.7363	91.154	3894.66	GAOXF-17571—2	1	1	1	1	1	1	9	13	33.24	65.43	9.87	14	5.08	7.5	6	8	3.45	4.51	9	28	12	17	5	9	0	0	0	0	0	0	0	2	0	2	2	4	0	4	4	2	2	2	2	1
Rosa sericea	Tibet, Lhasa	29.7361	91.154	3894.28	GAOXF-17571—3	1	1	1	1	1	1	9	11	30.32	61.23	8.93	13.45	4.56	6.12	6.06	9.32	3.05	4.41	10.8	27	4	9	3	7	0	0	0	0	0	0	0	2	0	2	2	3	0	4	4	0	0	0	0	1
Rosa sericea	Tibet, Lhasa	29.7362	91.1539	3901.15	GAOXF-17571—4	1	1	1	1	1	1	9	13	32.34	74.56	9.92	13.45	6.43	9.09	5.08	8	3.32	5.32	16	35	8	10.4	4	8	0	0	0	0	0	1	0	2	0	2	2	3	4	4	4	2	2	2	2	1
Rosa sericea	Tibet, Lhasa	29.736	91.154	3905.38	GAOXF-17571—5	1	1	1	1	1	1	9	13	23.45	54.32	10.23	14.56	5.46	7.34	6	9.18	3.52	4.67	10.1	31	3	8	3	9	0	0	0	0	0	1	0	2	0	2	2	3	2	4	4	2	2	2	2	1
Rosa sericea	Tibet, Lhasa	29.7358	91.154	3902.94	GAOXF-17571—6	1	1	1	1	1	1	7	13	33.24	70.56	8.83	12.34	4.98	7.56	5.68	9.98	2.98	4.71	14	35	4	7	3.2	10	0	0	0	0	0	1	0	2	0	2	2	3	0	4	4	2	2	2	2	1
Rosa sericea	Tibet, Lhasa	29.7356	91.1541	3894.48	GAOXF-17571—7	1	1	1	1	1	1	9	11	34.32	55.34	7.89	14.32	4.22	6.78	5.67	8.91	4.12	5.12	12	25	11	16	4	9.7	0	0	0	0	0	0	0	2	0	2	2	3	2	4	4	2	2	2	2	1
Rosa sericea	Tibet, Lhasa	29.7338	91.1552	3882.72	GAOXF-17571—8	1	1	1	1	1	1	7	13	27.32	60.45	9.32	14.53	3.99	8.43	6	10	3.13	5.05	13	34	9	12	5	11	0	0	0	0	0	0	0	2	0	2	2	3	2	4	4	2	2	2	2	1
Rosa sericea	Tibet, Lhasa	29.7339	91.1552	3879.25	GAOXF-17571—9	1	1	1	1	1	1	11	13	25.34	55.67	8.96	13.21	4.61	7.87	5.46	10	3.41	5.02	11	32	8	14	4	8.7	0	0	0	0	0	2	0	2	0	2	2	3	2	4	4	2	2	2	2	1
Rosa sericea	Tibet, Lhasa	29.7354	91.1545	3889.19	GAOXF-17571—10	1	1	1	1	1	1	7	13	20.34	50.54	8	12.34	4.32	7.61	6.12	9	3.39	5.12	12	29	7.6	12	5	8.4	0	0	0	0	0	2	0	2	0	2	2	4	0	4	4	1	1	1	1	1
Rosa sericea	Tibet, Ding Qing	31.2123	95.7923	3537.08	GAOXF-17575—1	1	1	1	1	1	1	9	13	35.46	53.45	10	14.32	4.67	6.78	5.18	8	2.98	4.17	12	31	8	13	4	9	0	0	0	0	0	0	0	2	0	2	2	4	3	4	4	1	1	1	1	1
Rosa sericea	Tibet, Ding Qing	31.2059	95.7935	3498.35	GAOXF-17575—2	1	1	1	1	1	1	7	13	20.34	50.54	9.06	13.23	4.56	8.73	5.67	8	3.78	4.34	15	27	7	11	7	13	0	0	0	0	0	0	0	2	0	2	2	3	4	4	4	1	1	1	1	1
Rosa sericea	Tibet, Ding Qing	31.2061	95.7932	3499.86	GAOXF-17575—3	1	1	1	1	1	1	9	13	22.54	55.67	8.09	14.05	5	8	5.78	8	3.45	4.53	21	34	7.6	12	5	8	0	0	0	0	0	0	0	2	0	2	2	2	0	4	4	2	2	2	2	1
Rosa sericea	Tibet, Ding Qing	31.2061	95.7933	3500.05	GAOXF-17575—4	1	1	1	1	1	1	9	13	21.34	60.43	9.22	13.07	3.45	5.5	5.51	10	3.89	4.89	9	30.6	8	12.4	3	8	0	0	0	0	0	0	0	2	0	2	2	2	0	4	4	3	3	3	3	1
Rosa sericea	Tibet, Ding Qing	31.207	95.7809	3575.9	GAOXF-17575—5	1	1	1	1	1	1	9	13	23.45	56.76	9.13	12.34	5.01	6.54	5.34	7	3.51	5.09	12	26	6	12	4	9	0	0	0	0	0	0	0	2	0	2	2	3	1	4	4	3	3	3	3	1
Rosa sericea	Tibet, Ding Qing	31.207	95.7808	3580.62	GAOXF-17575—6	1	1	1	1	1	1	7	13	22.54	63.34	8.65	13.21	4.53	6.12	6	10	3.31	5.12	10.9	22	8	15	5	8	0	0	0	0	0	0	0	2	0	2	2	3	0	4	4	3	3	3	3	1
Rosa sericea	Tibet, Ding Qing	31.2073	95.7803	3582.78	GAOXF-17575—7	1	1	1	1	1	1	11	13	25.65	65.43	7.67	12.32	4.5	7.34	5.67	10	3.29	5.11	12	27	9	11	6	9	0	0	0	0	0	2	0	2	0	2	2	3	1	4	4	3	3	3	3	1
Rosa sericea	Tibet, Ding Qing	31.2076	95.7803	3576.31	GAOXF-17575—8	1	1	1	1	1	1	7	13	21.34	55.45	8.09	14.34	3	6.39	5.59	9	3.67	4.79	17	30.8	7	12	4	8	0	0	0	0	0	2	0	2	0	2	2	4	1	4	4	4	4	4	4	1
Rosa sericea	Tibet, Ding Qing	31.2076	95.7804	3571.69	GAOXF-17575—9	1	1	1	1	1	1	9	13	23.54	78.65	9.71	15	3.5	5.53	5.08	8	3.12	4.63	14	26.8	9	14	8	10	0	0	0	0	0	0	0	2	0	2	2	4	1	4	4	0	0	0	0	1
Rosa sericea	Tibet, Ding Qing	31.2074	95.7806	3576.39	GAOXF-17575—10	1	1	1	1	1	1	7	13	20.34	50.54	9	14.32	3.5	6	5.01	8	3.87	4.39	17	38	7	13	4	9.4	0	0	0	0	0	0	0	2	0	2	2	3	0	4	4	1	1	1	1	1
Rosa sikangensis	Tibet, ChangDu	31.0886	96.9832	4094.1	GAOXF-17576—1	3	1	1	1	0	2	7	11	23	39.87	6.34	13.45	4.13	5.5	5.23	7.34	3.11	4.12	12	25	9	17	3	6	0	0	1	1	1	1	3	1	0	1	2	4	1	3	3	2	2	2	2	2
Rosa sericea	Tibet, ChangDu	31.0886	96.9832	4094.1	GAOXF-17576—2	1	1	1	1	1	1	7	13	25.34	56.34	8	13.24	5.32	6	5.13	8.12	2.56	4.01	17	25.8	13	16	4	7	0	0	0	0	0	1	3	2	0	2	0	1	0	3	3	2	2	2	2	1
Rosa sikangensis	Tibet, ChangDu	31.0885	96.9831	4094.03	GAOXF-17576—3	3	1	1	1	0	2	7	11	24.35	43.21	6.74	11.08	4.07	5.49	5.67	7.23	3.45	4.4	9	17	9	11.9	2.4	3.1	0	0	1	1	1	2	4	1	0	1	2	4	1	3	3	2	2	2	2	2
Rosa sikangensis	Tibet, ChangDu	31.0884	96.9829	4090.19	GAOXF-17576—4	3	1	1	1	1	1	7	11	20.18	35.67	9.12	14	4.19	6.09	5.51	7.33	2.63	3.2	10.4	19.3	8	11.8	2.9	2.6	0	0	1	1	1	3	3	1	0	1	4	4	0	4	4	0	0	0	0	2
Rosa sikangensis	Tibet, ChangDu	31.0885	96.9829	4092.14	GAOXF-17576—5	3	1	1	1	1	1	7	11	21.36	45.67	9.12	13.45	4.23	6.98	5.49	7.39	2.54	3.39	12	16.7	12	19	2.8	3.8	0	0	1	1	1	2	4	1	0	1	3	4	0	4	4	2	2	2	2	2
Rosa sericea	Tibet, ChangDu	31.0885	96.9828	4092.89	GAOXF-17576—6	1	1	1	1	1	1	7	13	23.45	63.21	8	13	5.14	6.13	4.98	8.15	2.73	3.18	11	17.6	11	17	2	8	0	0	0	0	0	1	3	2	0	2	2	1	0	3	3	0	0	0	0	1
Rosa sikangensis	Tibet, ChangDu	31.0885	96.9827	4094.86	GAOXF-17576—7	3	1	1	1	1	1	7	11	22.19	38.76	9	12.34	4.51	6.15	5.67	7.54	2.89	4.12	9	16	10	16	3	9	0	0	1	1	1	2	3	1	0	1	3	3	0	4	4	1	1	1	1	2
Rosa sericea	Tibet, ChangDu	31.0886	96.9827	4094.58	GAOXF-17576—8	1	1	1	1	1	1	7	13	23.45	49.78	8	13.45	3.97	6.11	5.58	8.14	2.44	4.45	17	23	16	23.3	2	5	0	0	0	0	0	1	3	2	0	2	2	1	0	3	3	0	0	0	0	1
Rosa sikangensis	Tibet, ChangDu	31.0886	96.9821	4106.02	GAOXF-17576—9	3	1	1	1	1	1	7	11	23.45	30.12	8.76	13.78	4.53	5.43	6.05	7.09	2.67	3.91	13	32	14	22	4	6.5	0	0	1	1	1	2	3	1	0	1	4	2	0	4	4	2	2	2	2	2
Rosa sericea	Tibet, ChangDu	31.0885	96.9818	4109.89	GAOXF-17576—10	1	1	1	1	1	1	7	13	27.87	45.78	8	13.43	3.54	6.75	5.12	8.87	2.78	3.54	27	34.2	5	9	3	5	0	0	0	0	0	1	3	2	0	2	2	1	0	3	3	0	0	0	0	1
Rosa sikangensis	Tibet, ChangDu	31.0956	96.9992	3851.54	GAOXF-17578—1	3	1	1	1	1	1	7	11	20.35	39.87	8.14	12.78	4.59	6.23	5.01	7.97	2.98	3.83	9	12.7	11	14.4	2.82	3.68	0	0	1	1	1	2	3	1	0	1	3	2	0	4	4	2	2	2	2	2
Rosa sericea	Tibet, ChangDu	31.0957	96.9993	3853.31	GAOXF-17578—2	1	1	1	1	1	1	7	13	23.45	50.12	8	14.56	4.12	5.98	5.04	8.23	2.35	3.76	9.9	13.1	10.4	14.8	2.9	3.8	0	0	0	0	0	1	3	2	0	2	2	1	0	3	3	0	0	0	0	1
Rosa sikangensis	Tibet, ChangDu	31.0958	96.9993	3864.94	GAOXF-17578—3	3	1	1	1	1	1	7	11	20.11	39.13	8.45	13.65	4.23	5.45	5.53	11.23	2.34	3.29	10.3	13.7	10.3	15.7	2.1	3.6	0	0	1	1	1	2	3	1	0	1	4	2	0	4	4	2	2	2	2	2
Rosa sericea	Tibet, ChangDu	31.096	96.9992	3872.31	GAOXF-17578—4	1	1	1	1	1	1	7	13	23.34	49.78	8.76	13.23	3.54	5	4.41	6.54	2.45	3.45	7.6	14.1	7.8	14.3	3.1	4.2	0	0	0	0	0	0	0	2	0	2	2	1	0	4	4	0	0	0	0	1
Rosa sericea	Tibet, ChangDu	31.0959	96.9992	3874.74	GAOXF-17578—5	1	1	1	1	1	1	7	13	29.87	65.32	7.89	14.23	4.12	5.34	5.13	6.07	2.56	3.54	11.1	24.2	6	16.7	3.6	5	0	0	0	0	0	0	0	2	0	2	2	1	0	4	4	0	0	0	0	1
Rosa sericea	Tibet, ChangDu	31.096	96.9991	3874.65	GAOXF-17578—6	1	1	1	1	1	1	9	11	24.34	39.78	9.78	13.76	5.32	6.09	4.56	5.11	2.89	3.39	14.1	22.6	5.6	15.3	2.3	4.9	0	0	0	0	0	0	0	2	0	2	2	1	0	4	4	0	0	0	0	1
Rosa sericea	Tibet, ChangDu	31.0961	96.9992	3882.78	GAOXF-17578—7	1	1	1	1	1	1	7	13	25.43	67.45	8.34	13	3.54	6.07	5.32	8.05	2.51	3.6	10.8	21.5	11.1	13.9	1.9	4.5	0	0	0	0	0	1	3	2	0	2	2	1	0	3	3	1	1	1	1	1
Rosa sericea	Tibet, ChangDu	31.0964	96.9993	3877.21	GAOXF-17578—8	1	1	1	1	1	1	7	13	29.34	49.78	6.54	12.34	3.23	5.13	2.98	6.54	2.34	3.54	8.8	22.1	5	14.4	2	3.5	0	0	0	0	0	0	0	2	0	2	2	3	0	3	3	0	0	0	0	1
Rosa sericea	Tibet, ChangDu	31.0961	96.9993	3872.43	GAOXF-17578—9	1	1	1	1	1	1	7	13	20.34	59.78	7.43	12.45	3.5	5.64	3.43	5.34	2.5	3.44	9.5	12.34	7.6	8.9	2.21	3.39	0	0	0	0	0	1	0	2	0	2	2	2	2	4	4	1	1	1	1	1
Rosa sericea	Tibet, ChangDu	31.0961	96.9994	3867.81	GAOXF-17578—10	1	1	1	1	1	1	5	13	21.35	43.56	9.65	15	4.54	7.32	5.14	9.34	3.1	5.43	10	12	7	8	1.2	2.5	0	0	0	0	0	1	3	2	0	2	2	0	2	1	1	2	2	2	2	1
Rosa sericea	Tibet, ChangDu	31.1185	97.0176	3707.31	GAOXF-17579—1	1	1	1	1	1	1	7	13	23.34	39.78	7.86	14.32	3.45	5.31	6.23	8.21	1.98	5.65	7.8	16.3	5.9	13	2.7	4.2	0	0	0	0	0	1	0	2	0	2	2	0	2	3	3	0	0	0	0	1
Rosa sericea	Tibet, ChangDu	31.1185	97.0175	3707.27	GAOXF-17579—2	1	1	1	1	1	1	7	13	20.3	65.4	7.56	11.23	3.23	5.52	4.21	6.43	2.98	6.71	8.2	15.8	6	9.7	2.5	4.2	0	0	0	0	0	0	0	2	0	2	2	2	2	3	3	0	0	0	0	1
Rosa sericea	Tibet, ChangDu	31.1186	97.0176	3691.51	GAOXF-17579—3	1	1	1	1	1	1	7	13	33.4	55.67	8.79	13.21	5.04	7.54	5.15	9.87	2.56	5.76	10.9	19.9	7	12	3	4.5	0	0	0	0	0	1	0	2	0	2	2	2	2	4	4	4	4	4	4	1
Rosa sericea	Tibet, ChangDu	31.1187	97.0176	3701.34	GAOXF-17579—4	1	1	1	1	1	1	7	11	15.1	71.23	8	12.45	4.93	5.67	5.14	8	3.22	5.63	5.5	15.5	8	13.9	3.8	4.1	0	0	0	0	0	0	0	2	0	2	2	3	2	4	4	4	4	4	4	1
Rosa sericea	Tibet, ChangDu	31.1187	97.0175	3703.56	GAOXF-17579—5	1	1	1	1	1	1	9	13	29.9	43.56	8.09	13.54	3.57	5.44	3.45	6.8	2.45	4.56	13	26.3	8.9	15.5	2.8	5.1	0	0	0	0	0	0	0	2	0	2	2	0	2	3	3	0	0	0	0	1
Rosa sericea	Tibet, ChangDu	31.1188	97.0175	3714.31	GAOXF-17579—6	1	1	1	1	1	1	7	13	22.34	39.45	9.03	12.45	4.54	5.43	4.32	7.4	2.98	5.67	7.1	15.8	8.9	11.7	1.3	4.27	0	0	0	0	0	0	0	2	0	2	2	1	2	3	3	0	0	0	0	1
Rosa sericea	Tibet, ChangDu	31.1189	97.0175	3714.04	GAOXF-17579—7	1	1	1	1	1	1	7	13	22.78	27.54	7.89	13.65	4.57	5.91	4.19	7.23	2.54	7.54	9.3	19.2	9.4	18.3	2.8	5.1	0	0	0	0	0	0	0	2	0	2	2	1	2	4	4	0	0	0	0	1
Rosa sericea	Tibet, ChangDu	31.119	97.0175	3722.95	GAOXF-17579—8	1	1	1	1	1	1	7	13	23.45	39.78	8.07	13	3.52	4.87	5.16	7.54	2.56	6.43	6.4	11.9	8	12	2.3	3.1	0	0	0	0	0	0	0	2	0	2	2	1	2	4	4	2	2	2	2	1
Rosa sericea	Tibet, ChangDu	31.1191	97.0173	3732.15	GAOXF-17579—9	1	1	1	1	1	1	9	13	29.43	41.23	8.67	13.45	5.43	6.12	4.33	7.89	2.54	6.54	7	14.1	7	13.1	2.1	3.3	0	0	0	0	0	0	0	2	0	2	2	1	2	4	4	3	3	3	3	1
Rosa sericea	Tibet, ChangDu	31.119	97.0174	3721.69	GAOXF-17579—10	1	1	1	1	1	1	7	13	26.2	49.78	7.98	13.05	3.54	6	5.43	8.76	2.54	7.32	8.1	19	10.1	13.2	1.7	4.3	0	0	0	0	0	1	3	2	0	2	2	1	2	3	3	2	2	2	2	1
Rosa sericea	Tibet, ChangDu	31.1611	97.0167	3515.18	GAOXF-17580—1	1	1	1	1	1	1	7	11	27.34	29.78	7.87	11.23	3.48	4.5	2.78	8.65	1.54	6.57	7.7	16.8	8.4	9.8	1.8	4.2	0	0	0	0	0	0	0	2	0	2	2	3	0	3	3	1	1	1	1	1
Rosa sericea	Tibet, ChangDu	31.1613	97.0168	3509.55	GAOXF-17580—2	1	1	1	1	1	1	7	11	25.1	35.46	7.62	12.34	3.56	5.36	3.46	7.65	2.36	5.67	10	12	7	8	2.2	4.3	0	0	0	0	0	1	0	2	0	2	2	2	2	4	4	3	3	3	3	1
Rosa sericea	Tibet, ChangDu	31.1618	97.0172	3514.84	GAOXF-17580—3	1	1	1	1	1	1	7	13	26.43	40.34	8.65	14.54	4.58	7.5	5.21	9.71	3.12	6.78	6.2	19.4	15.4	20.9	1.9	14	0	0	0	0	0	1	3	2	0	2	2	0	2	1	1	2	2	2	2	1
Rosa sericea	Tibet, ChangDu	31.1619	97.0173	3516.21	GAOXF-17580—4	1	1	1	1	1	1	7	13	24.32	45.56	9.87	13.45	3.51	4.32	6	8.14	2.43	4.56	7.7	13	12	15.4	8.7	13	0	0	0	0	0	1	0	2	0	2	2	0	2	3	3	0	0	0	0	1
Rosa sericea	Tibet, ChangDu	31.1626	97.0178	3508.69	GAOXF-17580—5	1	1	1	1	1	1	7	13	21.35	29.78	7.43	11.23	3.23	5.54	4.13	6.34	2.23	5.43	9.4	15.5	7.7	13.4	2.1	2.9	0	0	0	0	0	0	0	2	0	2	2	2	2	3	3	0	0	0	0	1
Rosa sericea	Tibet, ChangDu	31.1626	97.0178	3506.07	GAOXF-17580—6	1	1	1	1	1	1	7	13	23.45	55.67	9.21	14.32	5.12	7.49	5.32	8.78	2.54	5.65	5.3	18.6	8.4	12.5	2.7	3.9	0	0	0	0	0	1	0	2	0	2	2	2	2	4	4	4	4	4	4	1
Rosa sericea	Tibet, ChangDu	31.1628	97.0178	3510.51	GAOXF-17580—7	1	1	1	1	1	1	7	13	20.34	49.76	7.45	9.34	3.45	5.67	4	5.98	2.57	5.78	6.54	10.43	6.51	7.21	2.53	3.12	0	0	0	0	0	0	0	2	0	2	2	1	0	4	4	0	0	0	0	1
Rosa sericea	Tibet, ChangDu	31.1628	97.0179	3504.56	GAOXF-17580—8	1	1	1	1	1	1	7	13	23.65	43.45	7.68	12.34	4.21	4.56	4.97	6.54	2.59	4.67	10.1	15.7	7.6	9	2.3	3.7	0	0	0	0	0	0	0	2	0	2	2	1	3	4	4	0	0	0	0	1
Rosa sericea	Tibet, ChangDu	31.165	97.0145	3477.3	GAOXF-17580—9	1	1	1	1	1	1	9	13	33.21	56.78	7.88	13.42	5.43	6.54	4.32	6.78	3.09	4.98	7.8	14.3	5.3	9.1	3.3	4.3	0	0	0	0	0	0	0	2	0	2	2	1	3	4	4	0	0	0	0	1
Rosa sericea	Tibet, ChangDu	31.1647	97.0138	3490.39	GAOXF-17580—10	1	1	1	1	1	1	7	13	31.23	45	8	13.54	3.54	6.12	5.32	8.43	2.43	5.43	9.6	16.7	5	15.5	3.1	4.2	0	0	0	0	0	1	3	2	0	2	2	1	3	3	3	0	0	0	0	1
Rosa sericea	Tibet, ChangDu	31.19	97.0299	3334.63	GAOXF-17581—1	1	1	1	1	1	1	7	13	21.34	61.23	6	12.43	3.19	4.51	2.78	6.54	2.21	4.67	6.7	15.8	10.7	11	2.4	2.7	0	0	0	0	0	0	0	2	0	2	2	3	2	3	3	0	0	0	0	1
Rosa sericea	Tibet, ChangDu	31.1901	97.0302	3332.42	GAOXF-17581—2	1	1	1	1	1	1	7	13	34.5	55.43	7	12.43	3.54	5.06	3.66	5.54	2.16	5.41	7.7	14.3	9.3	10.1	2.1	3.4	0	0	0	0	0	1	0	2	0	2	2	2	2	4	4	2	2	2	2	1
Rosa sericea	Tibet, ChangDu	31.1901	97.0302	3328.88	GAOXF-17581—3	1	1	1	1	1	1	7	13	20.34	45.34	10	14.21	4.56	7.56	5.54	9.07	3.09	5.43	8.9	16.9	6.6	8.2	2.3	3.1	0	0	0	0	0	1	3	2	0	2	2	0	2	1	1	2	2	2	2	1
Rosa sericea	Tibet, ChangDu	31.19	97.0303	3322.56	GAOXF-17581—4	1	1	1	1	1	1	7	13	20.34	49.76	9	13.65	3.54	4.32	6.54	8.54	2.43	4.54	13	19.8	6.3	10.5	2.8	3.7	0	0	0	0	0	1	0	2	0	2	2	0	0	3	3	0	0	0	0	1
Rosa sericea	Tibet, ChangDu	31.1902	97.0304	3316.61	GAOXF-17581—5	1	1	1	1	1	1	7	13	20.98	40.34	7.54	12.43	3.65	5.53	4.51	6.65	3.45	3.54	8.2	19.7	3.9	10.5	3.1	7.2	0	0	0	0	0	0	0	2	0	2	2	2	1	3	3	0	0	0	0	1
Rosa sericea	Tibet, ChangDu	31.1902	97.0305	3311.45	GAOXF-17581—6	1	1	1	1	1	1	7	13	33.45	55	8.76	14.32	5.14	7.56	5.55	9.43	2.56	5.56	9.8	11.5	7	12.4	1.3	3	0	0	0	0	0	1	0	2	0	2	2	2	1	4	4	4	4	4	4	1
Rosa sericea	Tibet, ChangDu	31.1903	97.0306	3313.38	GAOXF-17581—7	1	1	1	1	1	1	7	13	15.34	54.45	8.09	28.98	3.54	5.34	5.19	8.34	3.22	4.98	18.9	26.2	7.5	12.9	2.3	3.6	0	0	0	0	0	0	0	2	0	2	2	3	1	4	4	4	4	4	4	1
Rosa sericea	Tibet, ChangDu	31.1903	97.0306	3315.14	GAOXF-17581—8	1	1	1	1	1	1	9	13	30.45	45.5	8.76	12.43	3.44	5.21	3.23	5.52	2.39	4.52	9.1	18.4	5.6	10.6	2.6	5	0	0	0	0	0	0	0	2	0	2	2	0	1	3	3	0	0	0	0	1
Rosa sericea	Tibet, ChangDu	31.1903	97.0307	3318.55	GAOXF-17581—9	1	1	1	1	1	1	7	13	20.13	46.57	9	12	3.45	4.48	4.13	6.54	3.43	5.32	14.7	21.2	8	10.3	2.7	3.3	0	0	0	0	0	0	0	2	0	2	2	1	0	3	3	0	0	0	0	1
Rosa sericea	Tibet, ChangDu	31.1902	97.0307	3321.65	GAOXF-17581—10	1	1	1	1	1	1	9	13	23.45	57.65	9.8	17.78	4.51	4.58	5.14	9.78	2.11	4.65	10.1	11.3	8.1	8.8	3.3	4.4	0	0	0	0	0	0	0	2	0	2	2	1	3	3	3	1	1	1	1	1
Rosa sericea	Tibet, ChangDu	30.6886	97.250197	4168	16771-1	1	1	1	1	1	1	9	11	20	35	8	10	3	4	3	5	2	2.5	3	4	5	6	2	2.5	0	0	1	0	0	0	2	2	0	0	0	0	0	1	0	0	0	0	0	0
Rosa sericea	Tibet, ChangDu	30.6881	97.250216	4169	16771-2	1	1	1	1	1	1	7	11	30	40	9	11	4	5	5	6	2.5	3	6	9	8	9	2	2.8	0	0	1	0	1	0	1	1	0	0	0	0	0	0	0	0	0	0	0	0
Rosa sericea	Tibet, ChangDu	30.6879	97.249958	4170	16771-3	1	1	1	1	1	1	9	11	27	45	9	14	3.5	6	5	8	2.5	3.5	6	7	9	10	2	2.3	0	0	1	0	1	0	1	2	0	0	0	0	0	0	0	0	0	0	0	0
Rosa sericea	Tibet, ChangDu	30.6879	79.249981	4172	16771-4	1	1	1	1	1	1	9	13	30	40	9	10	3.5	5	4	6	2	2.5	5	7	9	10	2	2	0	0	1	0	0	0	1	2	0	0	0	0	0	1	1	0	0	0	0	0
Rosa sericea	Tibet, ChangDu	30.6873	97.249757	4175	16771-5	1	1	1	1	1	1	9	11	25	40	9	12	4	4.5	4	6	2.5	3.5	6	7	7	8	2	2.5	0	0	1	0	0	0	1	2	0	0	0	0	0	0	0	0	0	0	0	0
Rosa sericea	Tibet, ChangDu	30.6894	97.249906	4169	16771-6	1	1	1	1	1	1	7	11	20	28	6	9	3	4	3	5	2	2.5	4	5	5	6	2.2	2.6	0	0	1	0	0	0	1	1	0	0	0	0	0	0	0	1	0	0	0	0
Rosa sericea	Tibet, ChangDu	30.6859	97.249139	4195	16771-7	1	1	1	1	1	1	7	11	25	35	8	11	3.5	5	3	5	2	3	5	6	6	8	2	2.5	0	0	1	0	0	0	1	1	0	0	0	0	0	0	0	1	0	0	0	0
Rosa sericea	Tibet, ChangDu	30.6855	97.248864	4213	16771-8	1	1	1	1	1	1	7	11	20	32	8	10	3.5	5	4	6	2	2.5	3	5	6	7	2	2.5	0	0	1	0	0	0	1	1	0	0	0	0	0	0	0	0	0	0	0	0
Rosa sericea	Tibet, ChangDu	30.6851	97.249284	4181	16771-9	1	1	1	1	1	1	7	9	22	30	7	10	3	4	4	6	2	2.5	5	7	6	7	2	2.3	0	0	1	0	0	0	0	1	0	0	0	0	0	0	1	0	0	0	0	0
Rosa sericea	Tibet, ChangDu	30.6854	97.24	4187	16771-10	1	1	1	1	1	1	7	9	20	25	7	9	4	5	3	5	2	2.5	3	4	7	8	2	2	0	0	1	0	0	0	1	2	0	0	0	0	0	1	0	0	0	0	0	0
Rosa sericea	Yunnan, Zhaotong	27.46603	104.14769	1750-1789	12800-15	1	1	1	1	1	1	7	9	20	30	9	14	4.5	6	5	7	2.5	3	7	9	9	11	2	2.5	0	0	0	0	0	0	0	0	0	0	4	0	2	0	4	0	0	0	3	0
Rosa sericea	Yunnan, Zhaotong				12800-17	1	1	1	1	1	1	7	9	25	40	9	14	4	7	5	7	2.5	3	6	9	8	9	2	2.5	0	0	0	0	0	0	0	0	0	0	4	0	1	0	4	0	0	0	2	0
Rosa sericea	Yunnan, Zhaotong				12800-19	1	1	1	1	1	1	9	11	25	35	10	15	4	6.5	5	7	2.5	3	7	11	10	12	2.5	2.5	0	0	0	0	0	0	0	0	0	0	4	0	1	0	4	0	0	0	4	0
Rosa sericea	Yunnan, Zhaotong				12800-20	1	1	1	1	1	1	7	9	20	25	6	9	3.5	5	4	5	2.5	3	6	8	6	7	2.5	3	0	0	0	0	0	0	0	0	0	0	1	0	1	0	4	0	0	0	0	0
Rosa sericea	Yunnan, Zhaotong				12800-22	1	1	1	1	1	1	7	11	20	35	8	13	4	4.5	5	6	2.5	3	9	11	7	8	3	3.5	0	0	0	0	0	0	0	0	0	0	1	0	1	0	4	0	0	0	0	0
Rosa sericea	Yunnan, Zhaotong				12800-4	1	1	1	1	1	1	9	11	25	35	11	13	5	6	4	5	2.5	3	9	12	10	11	2	2.5	0	0	0	0	1	0	0	0	0	0	3	0	1	0	4	0	0	0	0	0
Rosa sericea	Yunnan, Zhaotong				12800-1	1	1	1	1	1	1	7	9	25	45	8	13	3.5	6	5	8	2.5	3.5	9	12	10	11	2	2.5	0	0	0	0	1	0	1	3	0	0	2	0	1	0	3	0	0	0	0	0
Rosa sericea	Yunnan, Zhaotong				12800-2	1	1	1	1	1	1	7	9	15	25	6	10	3	4.5	2	6	1.5	3	3	4	7	8	1.2	1.3	0	0	0	0	1	0	0	0	0	0	2	0	3	0	3	0	0	0	0	0
Rosa sericea	Yunnan, Zhaotong				12800-3	1	1	1	1	1	1	7	11	20	35	7	10	3.5	5	3	5	2	3	10	12	7	8	2.2	2.5	0	0	0	0	1	0	1	0	0	0	4	0	2	0	4	0	2	0	4	0
Rosa sericea	Yunnan, Zhaotong				12800-5	1	1	1	1	1	1	5	9	20	40	10	15	4.5	7.5	5	9	3	5	10	12	7	8	2.2	2.5	0	0	0	0	1	0	1	3	0	0	0	0	0	0	1	0	2	0	4	0
Rosa sericea	Yunnan, Zhaotong				12800-6	1	1	1	1	1	1	7	11	20	35	9	14	3.5	4	6	8	1.5	2.5	1	3	7	8	1.5	1.7	0	0	0	0	1	0	1	0	0	0	2	0	0	0	3	0	0	0	0	0
Rosa sericea	Yunnan, Zhaotong				12800-7	1	1	1	1	1	1	7	11	20	30	6	10	3	5.5	4	6	2	3	1	2	9	11	1.7	2	0	0	0	0	1	0	0	0	0	0	2	0	2	0	3	0	0	0	0	0
Rosa sericea	Yunnan, Zhaotong				12800-8	1	1	1	1	1	1	7	11	35	55	11	18	5	7.5	5	10	2.5	5.5	10	12	11	13	2	2.3	0	0	0	0	1	0	1	0	0	0	3	0	2	0	4	0	4	0	4	0
Rosa sericea	Yunnan, Zhaotong				12800-9	1	1	1	1	1	1	7	9	15	35	8	12	3.5	5	5	8	3	4	10	12	11	13	2	2.3	0	0	0	0	1	0	0	0	0	0	2	0	3	0	4	0	4	0	4	0
Rosa sericea	Yunnan, Zhaotong				12800-16	1	1	1	1	1	1	7	9	15	30	6	10	2.5	5	3	6	2	3	5	9	6	8	1.5	2	0	0	0	0	0	0	0	0	0	0	3	0	2	0	4	0	0	0	0	0
Rosa sericea	Yunnan, Zhaotong				12800-24	1	1	1	1	1	1	9	11	13	20	6	8	3	4	3	4	1.5	2	5	9	6	7	2	2.5	0	0	0	0	1	0	1	0	0	0	4	0	4	0	4	0	0	0	0	0
Rosa sericea	Yunnan, Zhaotong				12800-25	1	1	1	1	1	1	9	11	25	50	11	15	4	5	5	8	3	3.5	9	12	8	9	2.5	3	0	0	0	0	1	0	2	0	1	0	4	0	4	0	4	0	4	0	4	0
Rosa sericea	Yunnan, Zhaotong	27.24207	104.1603	1450-1500	12804-1	1	1	1	1	1	1	7	11	35	55	13	20	5	7	5	10	3	4.5	12	17	12	13	3	3.5	0	0	0	0	1	0	0	0	0	0	1	0	1	0	2	1	0	0	0	0
Rosa sericea	Yunnan, Zhaotong				12804-2	1	1	1	1	1	1	7	11	30	45	12	16	5	7	5	8	3	4	11	16	10	11	3.5	3.5	0	0	0	0	0	0	0	0	0	0	2	0	2	0	2	0	0	0	0	0
Rosa sericea	Yunnan, Zhaotong				12804-3	1	1	1	1	1	1	7	9	15	25	6	9	4	4.5	4	6	3	3.5	10	12	7	8	3	3	0	0	0	0	0	0	0	0	0	0	4	0	3	0	4	0	0	0	0	0
Rosa sericea	Yunnan, Zhaotong				12804-4	1	1	1	1	1	1	7	9	20	30	7	11	3	4	4	6	3	3.5	10	13	7	8	3	3	0	0	0	0	1	0	0	0	0	0	3	0	3	0	3	1	0	0	0	0
Rosa sericea	Yunnan, Zhaotong				12804-5	1	1	1	1	1	1	7	9	20	30	8	11	3.5	5	5	7	3	4	6	8	8	10	2.5	3	0	0	0	0	0	0	1	0	0	0	3	0	2	0	3	1	0	0	0	0
Rosa sericea	Yunnan, Zhaotong				12804-6	1	1	1	1	1	1	7	9	25	30	8	13	4	5	5	7	3	3.5	9	11	10	12	3	3.5	0	0	0	0	0	0	1	0	0	0	1	0	1	0	3	1	0	0	0	0
Rosa sericea	Yunnan, Zhaotong				12804-8	1	1	1	1	1	1	7	9	25	30	8	11	4	5.5	5	7	3	3.5	11	13	6	9	2.5	3	0	0	0	0	1	0	0	0	0	0	2	0	0	0	3	1	0	0	0	0
Rosa sericea	Yunnan, Zhaotong				12804-9	1	1	1	1	1	1	7	9	25	35	8	12	4	5.5	4	6	3	3.5	8	14	8	9	2.5	2.5	0	0	0	0	0	0	0	0	0	0	1	0	3	0	4	0	0	0	0	0
Rosa sericea	Yunnan, Zhaotong				12804-7	1	1	1	1	1	1	5	9	30	40	10	13	4	5.5	5	10	2.2	3	6	12	9	11	3	3.5	0	0	0	0	0	0	0	0	0	0	2	0	2	0	3	0	0	0	0	0
Rosa sericea	Yunnan, Zhaotong				12804-10	1	1	1	1	1	1	7	9	25	40	9	14	3.5	5	5	9	3	4	12	17	10	13	3	3.5	0	0	0	0	1	0	0	0	0	0	1	0	2	0	3	1	0	0	0	0
Rosa sericea	Yunnan, Zhaotong				12804-11	1	1	1	1	1	1	5	9	25	40	9	15	4	6	6	12	2.5	4	7	14	8	9	2.5	3.5	0	0	0	0	1	0	0	0	0	0	3	0	1	0	3	0	0	0	0	0
Rosa sericea	Yunnan, Zhaotong				12804-12	1	1	1	1	1	1	5	11	25	45	7	12	2.5	4.5	3	6	2	3	15	16	6	7	1.8	2.1	0	0	0	0	0	0	1	0	0	0	1	0	0	0	0	1	0	0	0	0
Rosa sericea	Yunnan, Zhaotong				12804-13	1	1	1	1	1	1	7	11	20	40	9	14	4	6	5	9	2	3	9	16	7	12	2	2.1	0	0	0	0	1	0	0	0	0	0	3	0	1	0	4	0	0	0	0	0
Rosa sericea	Yunnan, Zhaotong				12804-14	1	1	1	1	1	1	7	11	30	50	9	15	4	5.5	5	7	2	3	15	17	12	15	3	3.5	0	0	0	0	1	0	0	0	0	0	2	0	2	0	3	0	0	0	0	0
Rosa sericea	Yunnan, Zhaotong				12804-15	1	1	1	1	1	1	7	9	25	35	9	14	3.5	6	5	9	2	3.5	3	6	6	10	2	3.5	0	0	0	0	1	0	0	0	0	0	2	0	1	0	2	0	0	0	0	0
Rosa sericea	Yunnan, Zhaotong				12804-16	1	1	1	1	1	1	7	9	15	30	5	9	3	4	4	6	2	3	9	13	7	12	2.5	3.5	0	0	0	0	1	0	0	0	0	0	4	0	2	1	4	1	0	0	0	0
Rosa sericea	Yunnan, Zhaotong	27.50387	105.12936	1380-1450	12818-1	1	1	1	1	1	1	7	11	40	70	12	23	5	8	7	18	4	5	11	19	11	12	3	3.5	0	0	0	0	0	0	0	0	0	0	3	0	1	0	4	0	0	0	0	0
Rosa sericea	Yunnan, Zhaotong				12818-10	1	1	1	1	1	1	7	11	30	45	8	12	3.5	5	4	6	2.5	3	8	14	9	10	2.5	3	0	0	0	0	0	0	1	0	0	0	1	0	1	0	1	0	0	0	0	0
Rosa sericea	Yunnan, Zhaotong				12818-14	1	1	1	1	1	1	7	13	25	50	8	14	4	7	5	9	2.5	3.5	12	16	7	9	3	3.5	0	0	0	0	0	0	1	0	0	0	4	0	2	0	4	0	0	0	0	0
Rosa sericea	Yunnan, Zhaotong				12818-16	1	1	1	1	1	1	9	11	25	40	9	11	3.5	5	5	7	3	3.5	10	12	7	8	2.5	3	0	0	0	0	0	0	1	0	0	0	1	0	1	0	2	1	0	0	0	0
Rosa sericea	Yunnan, Zhaotong				12818-2	1	1	1	1	1	1	7	11	30	60	9	16	3.5	6	6	8	2.5	4	10	15	6	7	3	4.5	0	0	0	0	0	0	0	0	0	0	3	0	1	0	4	0	0	0	0	0
Rosa sericea	Yunnan, Zhaotong				12818-22	1	1	1	1	1	1	7	9	25	40	8	12	3.5	4.5	4	5	2	2.5	11	16	7	8	3	3.5	0	0	0	0	0	0	0	0	0	0	3	0	1	0	4	0	0	0	0	0
Rosa sericea	Yunnan, Zhaotong				12818-4	1	1	1	1	1	1	7	9	15	20	6	7	3.5	4	4	5	2	2.5	9	13	8	9	3.5	4	0	0	0	0	0	0	0	0	0	0	4	0	2	0	4	0	0	0	0	0
Rosa sericea	Yunnan, Zhaotong				12818-5	1	1	1	1	1	1	7	9	20	30	7	10	3	5	5	6	2	2.5	6	11	8	9	2.5	3	0	0	0	0	0	0	0	0	0	0	3	0	1	0	3	0	0	0	0	0
Rosa sericea	Yunnan, Zhaotong				12818-6	1	1	1	1	1	1	5	7	15	20	5	8	2.5	4	3	5	2	2.5	6	9	6	8	3	3.5	0	0	0	0	0	0	0	0	0	0	2	0	1	0	1	0	0	0	0	0
Rosa sericea	Yunnan, Zhaotong				12818-7	1	1	1	1	1	1	7	13	25	50	9	14	3.5	5	5	7	2	3.5	9	12	8	9	2.5	3	0	0	0	0	0	0	0	0	0	0	4	0	1	0	4	0	0	0	0	0
Rosa sericea	Yunnan, Zhaotong				12818-3	1	1	1	1	1	1	7	9	25	35	7	9	2	4	4	7	2	3	12	19	7	13	2.5	3	0	0	0	0	0	0	0	0	0	0	3	0	1	0	4	0	0	0	0	0
Rosa sericea	Yunnan, Zhaotong				12818-8	1	1	1	1	1	1	5	13	25	80	8	20	4	7	5	13	3	4.5	10	17	7	9	2.8	3	0	0	0	0	0	0	0	0	0	0	3	0	2	0	4	0	0	0	0	0
Rosa sericea	Yunnan, Zhaotong				12818-9	1	1	1	1	1	1	7	9	20	30	6	10	2.5	3.5	3	5	1.5	2	8	15	7	10	3	3.5	0	0	0	0	0	0	0	0	0	0	2	0	2	0	4	0	0	0	0	0
Rosa sericea	Yunnan, Zhaotong				12818-11	1	1	1	1	1	1	7	9	15	32	6	11	2	4.5	4	6	2	3	6	13	6	11	2.5	3	0	0	0	0	0	0	0	0	0	0	3	0	2	0	4	0	0	0	0	0
Rosa sericea	Yunnan, Zhaotong				12818-12	1	1	1	1	1	1	7	9	20	40	8	12	3	4.5	5	7	1.5	2	6	12	7	11	2.5	3.5	0	0	0	0	0	0	0	0	0	0	3	0	4	0	4	0	0	0	0	0
Rosa sericea	Yunnan, Zhaotong				12818-13	1	1	1	1	1	1	7	9	20	30	6	11	3	3.5	3	5	2	2.5	7	9	6	7	2.9	3.1	0	0	0	0	0	0	0	0	0	0	1	0	0	1	2	0	0	0	0	0
Rosa sericea	Yunnan, Zhaotong				12818-15	1	1	1	1	1	1	5	9	15	25	7	13	3	4	4	6	2	3	3	11	8	10	3	3.5	0	0	0	0	0	0	0	0	0	0	3	0	4	0	3	1	0	0	0	0
Rosa sericea	Yunnan, Zhaotong				12818-17	1	1	1	1	1	1	7	11	20	40	7	11	4	5.5	4	6	2	3	10	15	8	10	2.5	3.5	0	0	0	0	0	0	1	0	0	0	3	0	1	1	3	1	0	0	0	0
Rosa sericea	Yunnan, Zhaotong				12818-18	1	1	1	1	1	1	7	9	20	30	6	8	3	3.5	4	6	2	2.5	10	12	7	8	3	3.2	0	0	0	0	0	0	0	0	0	0	2	0	1	1	3	0	0	0	0	0
Rosa sericea	Yunnan, Zhaotong				12818-19	1	1	1	1	1	1	7	9	30	50	8	13	4	5	5	11	2.5	3.5	11	17	8	12	2.5	4	0	0	0	0	0	0	1	0	0	0	2	0	1	0	2	1	0	0	0	0
Rosa sericea	Yunnan, Zhaotong				12818-20	1	1	1	1	1	1	7	11	25	65	9	17	3	10	5	9	3	4.5	16	21	8	11	3.5	4	0	0	0	0	0	0	1	0	0	0	4	0	2	1	3	1	0	0	0	0
Rosa sericea	Guizhou, Liupanshui	26.39813	104.45166	1970	12849-1	1	1	1	1	1	1	7	13	20	25	6	9	3	4	3	4	2	3	10	10	7	7	3	3	0	0	0	0	1	0	0	0	3	0	4	0	3	0	4	0	3	0	3	0
Rosa sericea	Guizhou, Liupanshui				12849-10	1	1	1	1	1	1	9	13	25	55	9	14	4	7	6	8	3	4	12	14	7	7	2	3	0	0	0	0	1	0	1	0	0	0	4	0	1	1	3	0	0	0	0	0
Rosa sericea	Guizhou, Liupanshui				12849-11	1	1	1	1	1	1	7	9	20	30	7	11	3	5	4	5	2	3	10	15	8	10	3	4	0	0	0	0	0	0	0	0	0	0	4	0	2	0	4	0	0	0	0	0
Rosa sericea	Guizhou, Liupanshui				12849-12	1	1	1	1	1	1	7	9	20	30	7	10	3	5	4	5	2	3	6	13	8	8	3	3	0	0	0	0	1	0	0	0	3	0	4	0	3	0	4	0	4	0	2	0
Rosa sericea	Guizhou, Liupanshui				12849-13	1	1	1	1	1	1	7	11	25	55	9	14	4	7	6	10	2	5	10	15	10	10	2	3	0	0	0	0	1	0	0	0	0	0	4	0	2	1	4	0	0	0	0	0
Rosa sericea	Guizhou, Liupanshui				12849-14	1	1	1	1	1	1	7	11	20	50	9	15	4	7	5	9	3	5	10	16	9	9	3	3	0	0	0	0	1	0	0	0	3	0	4	0	2	1	4	0	0	0	0	0
Rosa sericea	Guizhou, Liupanshui				12849-15	1	1	1	1	1	1	7	9	20	30	8	11	3	5	5	7	2	3	13	15	11	11	2	3	0	0	0	0	1	0	0	0	1	0	4	0	1	1	4	0	4	0	4	0
Rosa sericea	Guizhou, Liupanshui				12849-16	1	1	1	1	1	1	7	9	30	45	11	15	4	6	7	9	2	3	12	15	10	10	4	4	0	0	0	0	1	0	0	0	0	0	2	0	1	1	4	0	0	0	0	0
Rosa sericea	Guizhou, Liupanshui				12849-17	1	1	1	1	1	1	9	13	40	70	13	20	5	7	5	8	2	3	15	20	10	10	3	3	0	0	0	0	1	0	0	0	0	0	3	0	0	1	3	0	0	0	0	0
Rosa sericea	Guizhou, Liupanshui				12849-18	1	1	1	1	1	1	7	9	25	35	9	12	4	5	5	8	2	4	12	15	8	8	3	3	0	0	0	0	0	0	0	0	0	0	3	0	2	1	4	0	0	0	0	0
Rosa sericea	Guizhou, Liupanshui				12849-19	1	1	1	1	1	1	9	11	30	45	10	12	4	6	5	8	2	3	14	19	10	10	3	3	0	0	0	0	1	0	0	0	0	0	3	0	2	1	3	0	0	0	0	0
Rosa sericea	Guizhou, Liupanshui				12849-2	1	1	1	1	1	1	9	11	25	35	11	15	4	6	5	8	2	3	13	13	11	11	3	3	0	0	0	0	1	0	0	0	0	0	4	0	2	0	4	0	0	0	0	0
Rosa sericea	Guizhou, Liupanshui				12849-20	1	1	1	1	1	1	7	9	25	30	10	13	4	6	6	8	2	3	7	12	8	8	3	3	0	0	0	0	1	0	0	0	0	0	3	0	3	0	3	0	0	0	0	0
Rosa sericea	Guizhou, Liupanshui				12849-3	1	1	1	1	1	1	7	9	20	25	6	9	3	4	3	4	2	3	12	12	6	6	3	4	0	0	0	0	1	0	0	0	0	0	4	0	2	1	4	0	4	0	3	0
Rosa sericea	Guizhou, Liupanshui				12849-4	1	1	1	1	1	1	7	9	30	40	10	13	4	5	5	6	2	3	13	16	8	8	3	3	0	0	0	0	0	0	0	0	0	0	3	0	2	1	3	0	0	0	0	0
Rosa sericea	Guizhou, Liupanshui				12849-5	1	1	1	1	1	1	7	11	25	50	9	13	4	5	6	9	3	3	13	16	9	9	3	3	0	0	0	0	0	0	1	0	0	0	2	0	1	1	3	0	2	0	0	0
Rosa sericea	Guizhou, Liupanshui				12849-6	1	1	1	1	1	1	9	11	35	45	9	13	4	5	6	9	3	3	12	13	9	9	3	3	0	0	0	0	0	0	2	0	0	0	2	0	1	1	3	0	0	0	0	0
Rosa sericea	Guizhou, Liupanshui				12849-7	1	1	1	1	1	1	7	9	30	40	10	14	5	7	6	10	4	5	12	17	9	9	3	3	0	0	0	0	1	0	2	0	0	0	3	0	2	1	3	0	0	0	0	0
Rosa sericea	Guizhou, Liupanshui				12849-8	1	1	1	1	1	1	9	13	40	60	12	18	5	7	6	8	2	3	12	20	12	12	3	4	0	0	0	0	1	0	1	0	0	0	3	0	3	0	3	0	0	0	0	0
Rosa sericea	Guizhou, Liupanshui				12849-8	1	1	1	1	1	1	9	11	35	55	12	18	4	6	5	9	3	4	16	17	12	12	3	4	0	0	0	0	1	0	1	0	0	0	4	0	2	1	4	0	0	0	0	0
Rosa mairei	Yunnan, Qujing	26.4845	103.589875	2185	16785-1	0	0	0	1	0	1	7	11	25	30	10	13	3	4.5	5	8	2.5	3.5	3	4	10	11	3	3.5	0	0	0	0	1	0	3	0	4	0	4	0	4	0	4	0	0	0	0	0
Rosa mairei	Yunnan, Qujing	26.4845	103.589875	2202	16785-2	0	0	1	1	0	2	7	11	25	35	8	9	3	3.5	3	5	2	2.5	4	6	8	9	2.5	3.5	0	0	0	0	1	0	0	0	4	0	4	3	4	0	4	1	0	0	0	0
Rosa mairei	Yunnan, Qujing	26.4841	103.590037	2190	16785-3	1	2	1	1	0	1	7	9	20	25	8	10	3.5	4	4	5	2	2.5	3	4	5	6	2.5	3	0	0	0	0	1	0	0	0	4	0	4	2	4	0	4	2	0	0	0	0
Rosa mairei	Yunnan, Qujing	26.4841	103.590088	2219.8	16785-4	1	0	1	1	0	1	7	9	20	25	8	10	3.5	4	5	6	2.5	3	3	4	7	8	3	3.5	0	1	0	0	1	0	0	0	4	0	4	2	4	0	4	1	0	0	0	0
Rosa mairei	Yunnan, Qujing	26.4841	103.590376	2197.3	16785-5	0	0	1	1	0	1	9	11	25	40	9	12	3.5	5	5	7	3	4	3	4	8	10	3	3.5	0	1	0	0	1	0	0	0	4	0	4	2	4	0	4	2	0	0	0	0
Rosa mairei	Yunnan, Qujing	26.484	103.591049	2193.66	16785-6	0	0	1	1	0	1	7	9	20	30	7	11	3	3.5	6	9	2.5	3	7	8	10	12	2.5	3	0	1	0	0	1	0	0	0	4	0	4	1	4	0	4	0	0	0	0	0
Rosa mairei	Yunnan, Qujing	26.4838	103.591425	2191	16785-7	0	0	1	1	0	1	7	11	30	40	11	13	4	5	6	9	2.5	3.5	5	7	10	11	2.5	3	0	1	0	0	1	0	0	0	3	0	4	1	2	0	3	1	0	0	0	0
Rosa mairei	Yunnan, Qujing	26.4838	103.591496	2190	16785-8	0	2	0	1	0	1	7	11	20	35	8	11	4	5.5	5	7	2.5	3	5	6	7	8	2.5	3	0	0	0	0	1	0	0	0	4	0	4	1	4	0	4	0	0	0	0	0
Rosa mairei	Yunnan, Qujing	26.4833	103.591522	2189	16785-9	1	2	0	1	0	1	7	9	20	30	8	10	4.5	5	5	7	3	3.5	4	6	9	10	2.5	3	0	1	0	0	1	0	0	0	4	0	4	1	4	0	4	1	0	0	0	0
Rosa mairei	Yunnan, Qujing	26.483	103.591442	2187	16785-10	1	2	1	1	0	1	7	11	25	30	10	13	3	4	5	7	2.5	3	2	3	9	10	3	4	0	0	0	0	1	0	0	0	4	0	4	1	4	0	4	0	0	0	0	0
Rosa omeiensis	Hubei, Xingshan	31.28560	110.18061	2150－2180	13074-10	2	2	1	1	1	0	9	13	65	90	15	22	7	9	7	9	4	4	12	12	11	11	3	3	0	0	0	0	1	0	0	0	0	0	0	0	0	1	0	0	0	0	0	0
Rosa omeiensis	Hubei, Xingshan				13074-11	2	2	1	1	1	0	11	13	50	75	10	17	4	7	7	12	4	5	9	9	8	8	2	2	0	0	0	0	1	0	0	0	0	0	0	0	0	1	0	0	0	0	0	0
Rosa omeiensis	Hubei, Xingshan				13074-12	2	2	1	1	1	1	9	15	60	80	12	20	5	7	7	11	3	4	10	10	11	11	3	3	0	0	0	0	1	0	0	0	0	0	0	0	0	1	0	0	0	0	0	0
Rosa omeiensis	Hubei, Xingshan				13074-13	2	2	1	1	1	1	9	13	70	90	18	23	7	10	10	16	4	6	15	15	11	11	3	3	0	0	0	0	1	0	0	0	0	0	0	0	1	1	0	1	0	0	0	0
Rosa omeiensis	Hubei, Xingshan				13074-14	2	2	1	1	1	1	9	13	50	60	12	15	5	6	6	9	3	3	7	7	8	8	2	2	0	0	0	0	1	0	0	0	0	0	0	0	0	1	0	0	0	0	0	0
Rosa omeiensis	Hubei, Xingshan				13074-15	2	2	1	1	1	1	9	13	50	80	14	21	6	8	7	10	4	4	13	13	8	8	3	3	0	0	0	0	1	0	0	0	0	0	0	0	0	1	0	0	0	0	0	0
Rosa omeiensis	Hubei, Xingshan				13074-16	2	2	1	1	1	1	9	13	55	85	13	17	5	7	7	10	4	5	11	11	12	12	3	3	0	0	0	0	1	0	0	0	0	0	0	0	0	1	0	0	0	0	0	0
Rosa omeiensis	Hubei, Xingshan				13074-17	2	2	1	1	1	1	11	15	50	75	13	17	5	6	7	10	3	4	7	10	10	10	3	3	0	0	0	0	1	0	0	0	0	0	0	0	1	1	1	1	0	0	0	0
Rosa omeiensis	Hubei, Xingshan				13074-18	2	2	1	1	1	1	9	13	60	80	15	19	6	8	7	9	4	5	8	13	11	11	3	3	0	0	0	0	1	0	0	0	0	0	0	0	1	1	1	1	0	0	0	0
Rosa omeiensis	Hubei, Xingshan				13074-19	2	2	1	1	1	1	9	15	50	90	12	20	6	9	7	12	3	5	8	10	11	11	3	3	0	0	0	0	1	0	0	0	0	0	0	0	1	1	0	0	0	0	0	0
Rosa omeiensis	Hubei, Xingshan				13074-2	2	2	1	1	1	1	11	15	70	95	14	23	6	8	8	10	3	4	11	11	11	11	3	3	0	0	0	0	0	0	0	0	0	0	0	0	1	1	1	1	0	0	0	0
Rosa omeiensis	Hubei, Xingshan				13074-20	2	2	1	1	1	1	9	13	55	70	15	19	5	8	10	13	4	5	8	13	12	12	3	3	0	0	0	0	1	0	0	0	0	0	0	0	0	1	1	1	0	0	0	0
Rosa omeiensis	Hubei, Xingshan				13074-21	2	2	1	1	1	1	9	13	65	80	14	20	5	8	8	12	4	5	12	12	8	8	2	2	0	0	0	0	1	0	0	0	0	0	0	0	0	1	0	0	0	0	0	0
Rosa omeiensis	Hubei, Xingshan				13074-22	2	2	1	1	1	1	9	13	50	70	12	16	5	7	5	9	3	4	11	11	10	10	3	3	0	0	0	0	1	0	0	0	0	0	0	0	0	1	0	1	0	0	0	0
Rosa omeiensis	Hubei, Xingshan				13074-23	2	2	1	1	1	1	11	13	70	100	15	24	6	9	7	10	3	4	12	12	11	11	3	3	0	0	0	0	0	0	0	0	0	0	0	0	1	1	0	1	0	0	0	0
Rosa omeiensis	Hubei, Xingshan				13074-3	2	2	1	1	1	1	9	13	55	80	13	20	5	6	8	12	4	6	11	11	11	11	3	3	0	0	0	0	1	0	0	0	0	0	0	0	1	1	1	1	0	0	0	0
Rosa omeiensis	Hubei, Xingshan				13074-4	2	2	1	1	1	1	9	13	55	75	13	18	6	8	7	10	3	4	10	10	9	9	3	3	0	0	0	0	1	0	0	0	0	0	0	0	0	1	0	1	0	0	0	0
Rosa omeiensis	Hubei, Xingshan				13074-5	2	2	1	1	1	1	9	13	55	85	13	19	5	6	5	8	2	3	11	11	12	12	3	3	0	0	0	0	1	0	0	0	0	0	0	0	0	1	1	1	0	0	0	0
Rosa omeiensis	Hubei, Xingshan				13074-6	2	2	1	1	1	1	9	13	50	60	9	15	4	5	6	9	2	3	8	8	9	9	2	2	0	0	0	0	1	0	0	0	0	0	0	0	0	1	0	0	0	0	0	0
Rosa omeiensis	Hubei, Yichang	31.27466	110.1341	2700	13088-1	2	2	1	1	1	0	9	11	60	90	16	25	6	9	9	13	4	6	10	10	11	11	4	4	0	0	0	0	1	0	0	0	0	0	1	0	2	1	2	0	0	0	0	0
Rosa omeiensis	Hubei, Yichang				13088-2	2	2	1	1	1	0	9	15	50	80	14	22	5	7	8	12	4	4	10	10	10	10	4	4	0	0	0	0	1	0	0	0	0	0	0	0	3	1	0	0	0	0	0	0
Rosa omeiensis	Hubei, Yichang				13088-3	2	2	1	1	1	1	9	11	65	115	17	29	8	11	10	17	4	7	8	8	10	10	4	4	0	0	0	0	1	0	0	0	0	0	0	0	1	1	0	0	0	0	0	0
Rosa omeiensis	Shaanxi, Ankang	32.1228	109.18652	2057	13160-1	2	2	1	1	1	0	9	13	80	100	19	25	7	9	9	13	4	5	17	17	14	14	4	4	0	0	0	0	0	0	0	0	0	0	1	0	4	0	3	0	0	0	0	0
Rosa omeiensis	Shaanxi, Ankang				13160-10	2	2	1	1	1	0	9	15	70	90	15	22	5	8	8	11	4	5	15	15	10	10	3	3	0	0	0	0	0	0	3	0	0	0	1	0	3	1	1	1	0	0	0	0
Rosa omeiensis	Shaanxi, Ankang				13160-11	2	2	1	1	1	1	7	15	40	60	12	17	5	7	8	10	4	5	10	10	11	11	3	3	0	0	0	0	0	0	3	0	0	0	1	0	3	1	3	1	0	0	0	0
Rosa omeiensis	Shaanxi, Ankang				13160-12	2	2	1	1	1	1	11	15	65	90	17	22	6	8	8	11	4	5	12	12	10	10	4	4	0	0	0	0	0	0	0	0	0	0	3	0	3	1	3	1	0	0	0	0
Rosa omeiensis	Shaanxi, Ankang				13160-13	2	2	1	1	1	1	9	15	70	100	18	25	7	8	9	15	5	5	12	12	10	10	4	4	0	0	0	0	0	0	0	0	0	0	1	0	3	0	3	0	0	0	0	0
Rosa omeiensis	Shaanxi, Ankang				13160-14	2	2	1	1	1	1	9	15	60	90	14	22	5	7	7	10	4	4	10	10	9	9	3	3	0	0	0	0	0	0	3	0	0	0	3	0	4	0	1	1	0	0	0	0
Rosa omeiensis	Shaanxi, Ankang				13160-15	2	2	1	1	1	1	9	15	60	85	14	23	4	8	6	8	3	3	10	11	9	9	3	3	0	0	0	0	0	0	0	0	0	0	4	0	4	1	3	0	0	0	0	0
Rosa omeiensis	Shaanxi, Ankang				13160-16	2	2	1	1	1	1	9	13	60	75	15	20	5	9	8	10	3	4	11	10	9	9	3	3	0	0	0	0	0	0	0	0	0	0	2	0	4	1	1	1	0	0	0	0
Rosa omeiensis	Shaanxi, Ankang				13160-17	2	2	1	1	1	1	9	13	70	90	16	23	5	6	8	11	3	5	15	15	10	10	3	3	0	0	0	0	0	0	0	0	1	0	2	0	3	1	3	0	0	0	0	0
Rosa omeiensis	Shaanxi, Ankang				13160-18	2	2	1	1	1	1	9	15	55	75	15	18	5	6	5	7	3	4	9	9	10	10	3	3	0	0	0	0	0	0	0	0	0	0	2	0	3	1	3	0	0	0	0	0
Rosa omeiensis	Shaanxi, Ankang				13160-19	2	2	1	1	1	1	9	15	70	90	19	27	6	10	9	13	4	5	20	20	11	11	3	3	0	0	0	0	0	0	0	0	0	0	2	0	3	1	3	1	0	0	0	0
Rosa omeiensis	Shaanxi, Ankang				13160-2	2	2	1	1	1	1	9	15	60	90	18	23	5	7	8	15	3	5	11	11	11	11	3	3	0	0	0	0	0	0	0	0	0	0	3	0	4	1	3	0	0	0	0	0
Rosa omeiensis	Shaanxi, Ankang				13160-20	2	2	1	1	1	1	9	17	55	70	14	16	5	7	5	8	3	4	11	11	10	10	3	3	0	0	0	0	0	0	0	0	0	0	2	0	3	1	1	1	0	0	0	0
Rosa omeiensis	Shaanxi, Ankang				13160-21	2	2	1	1	1	1	9	13	60	80	15	20	5	7	7	11	4	5	12	12	9	9	3	3	0	0	0	0	0	0	0	0	1	0	3	0	3	1	3	0	0	0	0	0
Rosa omeiensis	Shaanxi, Xian	33.50604	108.48483	1800－1915	13168-1	2	2	1	1	1	1	9	17	75	100	15	21	6	9	9	11	4	4	7	7	11	11	3	3	0	0	0	0	0	0	0	0	0	0	0	0	1	1	0	0	0	0	0	0
Rosa omeiensis	Shaanxi, Xian				13168-10	2	2	1	1	1	1	9	15	70	95	15	22	6	9	7	11	4	4	12	12	12	12	3	3	0	0	0	0	1	0	0	0	0	0	0	0	1	1	1	1	0	0	0	0
Rosa omeiensis	Shaanxi, Xian				13168-17	2	2	1	1	1	1	7	15	60	100	12	20	5	10	6	9	3	4	15	15	12	12	3	3	0	0	0	0	0	0	0	0	0	0	0	0	0	0	0	0	0	0	0	0
Rosa omeiensis	Shaanxi, Xian				13168-18	2	2	1	1	1	1	11	15	60	100	13	24	6	10	9	13	4	5	10	10	11	11	3	3	0	0	0	0	0	0	0	0	0	0	0	0	1	1	0	0	0	0	0	0
Rosa omeiensis	Shaanxi, Xian				13168-19	2	2	1	1	1	1	9	13	60	95	13	20	6	8	10	13	5.5	8	12	12	13	13	3	3	0	0	0	0	0	0	0	0	0	0	0	0	1	1	0	0	0	0	0	0
Rosa omeiensis	Shaanxi, Xian				13168-2	2	2	1	1	1	1	9	13	50	75	14	19	6	8	10	12	4	5	10	13	11	11	3	3	0	0	0	0	0	0	0	0	0	0	0	0	0	1	0	0	0	0	0	0
Rosa omeiensis	Shaanxi, Xian				13168-20	2	2	1	1	1	1	9	17	70	100	15	24	5	9	10	14	4	5	17	17	11	11	3	3	0	0	0	0	0	0	0	0	0	0	0	0	1	1	0	0	0	0	0	0
Rosa omeiensis	Shaanxi, Xian				13168-3	2	2	1	1	1	1	9	13	70	100	19	24	5	11	11	17	4	6	15	15	11	11	3	3	0	0	0	0	0	0	0	0	0	0	0	0	1	1	0	0	0	0	0	0
Rosa omeiensis	Shaanxi, Xian				13168-4	2	2	1	1	1	1	9	13	50	65	10	13	4	5	6	9	4	4	6	6	9	9	3	3	0	0	0	0	0	0	1	0	0	0	0	0	0	1	0	1	0	0	0	0
Rosa omeiensis	Shaanxi, Xian				13168-5	2	2	1	1	1	1	9	13	50	90	12	21	6	8	7	11	4	5	12	12	8	8	3	3	0	0	0	0	0	0	1	0	0	0	0	0	1	1	0	0	0	0	0	0
Rosa omeiensis	Shaanxi, Xian				13168-6	2	2	1	1	1	1	9	17	50	70	10	16	4	5	5	8	3	4	11	11	11	11	3	3	0	0	0	0	0	0	1	0	0	0	0	0	0	1	0	0	0	0	0	0
Rosa omeiensis	Shaanxi, Xian				13168-7	2	2	1	1	1	1	9	13	50	70	14	20	4	6	7	9	3	4	13	13	11	11	3	3	0	0	0	0	0	0	0	0	0	0	0	0	0	1	0	1	0	0	0	0
Rosa omeiensis	Shaanxi, Xian				13168-8	2	2	1	1	1	1	9	15	55	80	14	19	5	6	7	10	4	5	10	10	8	8	2	2	0	0	0	0	0	0	0	0	0	0	0	0	1	1	0	1	0	0	0	0
Rosa omeiensis	Shaanxi, Xian				13168-9	2	2	1	1	1	1	9	13	60	85	16	20	5	8	9	14	4	6	13	13	9	9	3	3	0	0	0	0	0	0	0	0	0	0	0	0	0	1	0	0	0	0	0	0
Rosa omeiensis	Shaanxi, Xian				13168-11	2	2	1	1	1	1	9	15	70	90	12	19	4	6	8	11	3	4	14	14	11	11	2	2	0	0	0	0	0	0	0	0	0	0	0	0	1	1	0	0	0	0	0	0
Rosa omeiensis	Shaanxi, Xian				13168-12	2	2	1	1	1	1	7	13	40	75	11	19	6	10.5	8	12	4	5.5	13	15	11	14	3.2	3.5	0	0	0	0	0	0	0	0	0	0	0	0	0	1	0	0	1	0	0	0
Rosa omeiensis	Shaanxi, Xian				13168-13	2	2	1	1	1	1	9	13	45	95	10	20	4.5	8	6	16	4	6	11	15	9	11	2.5	3	0	0	0	0	0	0	0	0	0	0	0	0	1	1	0	1	0	0	0	0
Rosa omeiensis	Shaanxi, Xian				13168-14	2	2	1	1	1	1	9	15	30	85	9	18	5	8	5	10	3	4	8	11	11	13	3	3.5	0	0	0	0	0	0	0	0	0	0	0	0	0	1	0	0	0	0	0	0
Rosa omeiensis	Shaanxi, Xian				13168-15	2	2	1	1	1	1	7	17	35	105	12	14	6	12	6	12	4	6.5	11	14	10	12	2,5	3	0	0	0	0	0	0	0	0	0	0	0	0	1	1	0	0	0	0	0	0
Rosa omeiensis	Shaanxi, Xian				13168-16	2	2	1	1	1	1	7	15	40	85	11	18	4	8	5	10	4	5	7	12	8	9	3	3.5	0	0	0	0	0	0	0	0	0	0	0	0	0	1	0	1	0	0	0	0
Rosa omeiensis	Shaanxi, Xian				13168-21	2	2	1	1	1	1	7	13	35	85	9	18	5	8	5	9	4	5	12	14	8	9	2.7	3	0	0	0	0	0	0	1	0	0	0	0	0	0	1	0	0	0	0	0	0
Rosa omeiensis	Gansu, Pingliang	35.10787	106.21600	2110-2300	13220-1	2	2	1	1	1	1	9	13	45	90	14	20	5	8	6	8	4	5	9	11	7	7	2	2	0	0	0	0	0	0	1	0	1	0	1	0	2	1	0	2	2	0	2	0
Rosa omeiensis	Gansu, Pingliang				13220-10	2	2	1	1	1	1	9	13	50	65	11	15	5	6	5	7	3	4	15	17	11	11	2	3	0	0	0	0	0	0	3	1	0	0	0	0	0	1	1	2	2	0	2	0
Rosa omeiensis	Gansu, Pingliang				13220-11	2	2	1	1	1	1	9	13	50	90	20	22	6	9	5	12	3	5	12	12	8	8	3	3	0	0	0	0	0	0	0	1	0	0	1	0	3	1	1	1	0	0	0	0
Rosa omeiensis	Gansu, Pingliang				13220-12	2	2	1	1	1	1	9	13	50	60	11	17	5	7	5	8	4	4	15	17	11	11	2	3	0	0	0	0	0	0	1	0	0	0	1	0	1	1	1	1	0	0	0	0
Rosa omeiensis	Gansu, Pingliang				13220-13	2	2	1	1	1	1	9	13	60	85	16	22	6	8	5	10	3	4	15	17	11	11	3	3	0	0	0	0	0	0	1	0	2	0	1	0	1	1	1	2	0	0	0	0
Rosa omeiensis	Gansu, Pingliang				13220-14	2	2	1	1	1	1	9	11	50	90	13	21	5	8	6	10	3	5	15	17	11	11	2	3	0	0	0	0	0	0	2	0	2	0	1	0	1	1	1	2	0	0	0	0
Rosa omeiensis	Gansu, Pingliang				13220-15	2	2	1	1	1	1	7	11	40	50	9	13	4	6	4	5	3	4	11	11	9	9	3	3	0	0	0	0	0	0	1	0	0	0	1	0	1	1	1	1	0	0	0	0
Rosa omeiensis	Gansu, Pingliang				13220-16	2	2	1	1	1	1	9	13	40	75	9	16	4	6	4	5	3	4	10	12	9	10	3	3	0	0	0	0	0	0	0	0	0	0	1	0	1	1	0	1	0	0	0	0
Rosa omeiensis	Gansu, Pingliang				13220-17	2	2	1	1	1	1	9	11	30	45	8	11	4	5	4	8	3	4	10	12	9	10	3	3	0	0	0	0	0	0	2	0	2	0	1	0	0	1	1	1	0	0	0	0
Rosa omeiensis	Gansu, Pingliang				13220-18	2	2	1	1	1	1	9	13	50	80	10	20	6	7	4	6	3	4	10	16	7	7	3	3	0	0	0	0	0	0	1	0	2	0	1	0	2	1	1	1	0	0	0	0
Rosa omeiensis	Gansu, Pingliang				13220-19	2	2	1	1	1	1	9	17	60	90	15	21	7	8	7	11	4	5	10	16	8	8	3	3	0	0	0	0	0	0	0	0	2	0	1	0	1	1	1	1	0	0	0	0
Rosa omeiensis	Gansu, Pingliang				13220-2	2	2	1	1	1	1	7	11	30	55	9	15	5	6	6	8	3	4	10	16	7	7	2	2	0	0	0	0	0	0	1	0	1	0	1	0	2	1	0	1	0	0	0	0
Rosa omeiensis	Gansu, Pingliang				13220-20	2	2	1	1	1	1	9	15	55	80	10	15	5	8	6	8	3	4	13	15	12	12	3	3	0	0	0	0	0	0	1	0	2	0	1	0	1	1	1	2	0	0	0	0
Rosa omeiensis	Gansu, Pingliang				13220-3	2	2	1	1	1	1	7	11	50	80	13	20	5	8	5	8	3	4	15	17	8	8	4	4	0	0	0	0	0	0	0	0	1	0	1	0	2	1	3	0	2	0	2	0
Rosa omeiensis	Gansu, Pingliang				13220-4	2	2	1	1	1	1	7	13	40	80	10	23	5	7	5	9	3	4	10	12	10	10	2	2	0	0	0	0	0	0	1	0	1	0	1	0	2	1	1	2	0	0	1	0
Rosa omeiensis	Gansu, Pingliang				13220-5	2	2	1	1	1	1	9	13	50	70	11	16	5	7	6	8	3	4	17	21	8	8	3	3	0	0	0	0	0	0	0	0	2	0	1	0	2	1	1	2	0	0	2	0
Rosa omeiensis	Gansu, Pingliang				13220-6	2	2	1	1	1	1	9	13	65	85	13	24	6	8	4	8	3	4	19	23	10	10	3	3	0	0	0	0	0	0	0	0	2	0	1	0	1	1	1	2	0	0	2	0
Rosa omeiensis	Gansu, Pingliang				13220-7	2	2	1	1	1	1	7	15	60	90	14	22	7	8	5	12	3	4	15	15	9	9	3	3	0	0	0	0	0	0	0	0	2	0	1	0	2	1	1	2	0	0	2	0
Rosa omeiensis	Gansu, Pingliang				13220-8	2	2	1	1	1	1	9	15	60	90	17	22	4	7	6	11	4	4	16	18	12	12	3	3	0	0	0	0	0	0	1	0	2	0	1	0	1	1	1	1	0	0	2	0
Rosa omeiensis	Gansu, Pingliang				13220-9	2	2	1	1	1	1	9	13	60	80	14	21	5	7	7	11	4	5	10	21	10	10	3	3	0	0	0	0	0	0	0	0	2	0	1	0	2	1	1	1	0	0	0	0
Rosa omeiensis	Gansu, Baiyin	37.8084	103.44553	2618－2820	13238-1	2	2	1	1	1	0	9	11	30	50	7	12	4	6	5	7	3	4	2	2	7	7	2	2	0	0	0	0	0	0	3	2	1	0	1	0	1	1	1	2	0	0	0	0
Rosa omeiensis	Gansu, Baiyin				13238-10	2	2	1	1	1	0	7	11	25	35	7	10	3	4	3	5	2	3	2	2	7	7	2	2	0	0	0	0	0	0	3	1	0	0	1	0	0	1	1	2	0	0	0	0
Rosa omeiensis	Gansu, Baiyin				13238-11	2	2	1	1	1	1	9	11	25	50	6	14	3	6	4	6	2	3	3	4	7	7	2	2	0	0	0	0	0	0	3	1	0	0	1	0	1	1	1	2	0	0	0	0
Rosa omeiensis	Gansu, Baiyin				13238-12	2	2	1	1	1	1	9	11	20	40	5	9	3	4	3	5	2	3	2	2	7	7	2	2	0	0	0	0	0	0	3	1	0	0	1	0	0	1	1	2	0	0	0	0
Rosa omeiensis	Gansu, Baiyin				13238-13	2	2	1	1	1	1	9	13	40	55	8	11	3	5	4	6	2	3	3	3	6	6	2	2	0	0	0	0	0	0	2	2	0	0	1	0	0	1	0	2	0	0	0	0
Rosa omeiensis	Gansu, Baiyin				13238-14	2	2	1	1	1	1	9	11	30	40	8	11	3	5	4	6	2	3	3	3	7	7	2	2	0	0	0	0	0	0	2	1	1	0	3	0	2	1	1	2	0	0	0	0
Rosa omeiensis	Gansu, Baiyin				13238-15	2	2	1	1	1	1	7	11	30	50	8	11	3	5	4	6	2	3	1	2	6	6	2	2	0	0	0	0	0	0	3	2	1	0	1	0	1	1	0	2	0	0	0	0
Rosa omeiensis	Gansu, Baiyin				13238-16	2	2	1	1	1	1	7	13	40	55	9	12	4	5	4	6	2	3	4	5	7	7	2	2	0	0	0	0	0	0	4	4	0	0	1	0	0	1	0	2	0	0	0	0
Rosa omeiensis	Gansu, Baiyin				13238-17	2	2	1	1	1	1	7	11	35	50	8	11	3	5	4	6	2	3	3	5	8	8	2	2	0	0	0	0	0	0	2	1	0	0	0	0	0	1	0	1	0	0	0	0
Rosa omeiensis	Gansu, Baiyin				13238-18	2	2	1	1	1	1	7	11	35	40	8	10	4	5	5	6	2	3	8	8	9	9	2	2	0	0	0	0	0	0	2	1	0	0	1	0	0	1	1	2	0	0	0	0
Rosa omeiensis	Gansu, Baiyin				13238-19	2	2	1	1	1	1	9	11	45	55	10	13	4	5	5	7	3	4	4	4	7	7	2	2	0	0	0	0	0	0	2	1	1	0	1	0	1	1	1	2	0	0	0	0
Rosa omeiensis	Gansu, Baiyin				13238-2	2	2	1	1	1	1	9	13	40	60	10	15	4	6	5	8	3	4	2	3	8	8	2	2	0	0	0	0	0	0	2	1	0	0	0	0	0	1	0	2	0	0	0	0
Rosa omeiensis	Gansu, Baiyin				13238-20	2	2	1	1	1	1	9	13	40	50	8	10	4	5	4	6	3	4	2	2	7	7	2	2	0	0	0	0	0	0	3	1	1	0	1	0	0	1	1	1	0	0	0	0
Rosa omeiensis	Gansu, Baiyin				13238-21	2	2	1	1	1	1	9	13	30	50	8	11	4	5	5	7	3	4	3	4	7	7	2	2	0	0	0	0	0	0	1	1	1	0	1	0	0	1	1	2	0	0	0	0
Rosa omeiensis	Gansu, Baiyin				13238-22	2	2	1	1	1	1	9	11	25	50	8	10	4	5	5	6	3	4	2	3	7	7	2	2	0	0	0	0	0	0	1	1	0	0	1	0	1	1	3	0	0	0	0	0
Rosa omeiensis	Gansu, Baiyin				13238-3	2	2	1	1	1	1	9	11	40	50	10	12	4	6	5	6	3	4	2	2	10	10	2	2	0	0	0	0	0	0	2	1	1	0	1	0	0	1	1	1	0	0	0	0
Rosa omeiensis	Gansu, Baiyin				13238-4	2	2	1	1	1	1	7	11	30	40	7	10	3	4	5	6	2	3	4	6	7	7	2	2	0	0	0	0	0	0	3	1	0	0	2	0	0	1	0	1	0	0	0	0
Rosa omeiensis	Gansu, Lanzhou	35.47600	104.3323	2200-2600	13250-1	2	2	1	1	1	1	9	11	50	70	12	17	5	7	7	10	4	4	9	9	8	8	3	3	0	0	0	0	0	0	4	0	0	0	1	0	2	1	1	1	0	0	0	0
Rosa omeiensis	Gansu, Lanzhou				13250-10	2	2	1	1	1	1	9	11	55	80	15	22	5	8	8	12	4	6	5	5	6	6	2	2	0	0	0	0	0	0	2	1	0	0	0	0	1	1	0	0	0	0	0	0
Rosa omeiensis	Gansu, Lanzhou				13250-11	2	2	1	1	1	1	7	11	60	70	14	18	6	8	7	12	4	5	5	5	6	6	2	2	0	0	0	0	0	0	3	1	0	0	1	0	1	1	2	0	0	0	0	0
Rosa omeiensis	Gansu, Lanzhou				13250-12	2	2	1	1	1	1	9	17	60	90	15	22	6	9	8	11	5	5	6	10	11	11	2	2	0	0	0	0	0	0	2	1	0	0	1	0	1	1	1	1	0	0	0	0
Rosa omeiensis	Gansu, Lanzhou				13250-13	2	2	1	1	1	1	7	11	55	75	12	17	6	7	8	10	4	5	6	6	5	5	2	2	0	0	0	0	0	0	3	1	1	0	2	0	3	0	1	1	0	0	0	0
Rosa omeiensis	Gansu, Lanzhou				13250-14	2	2	1	1	1	1	9	11	45	70	11	16	6	7	7	8	5	5	10	10	7	7	3	3	0	0	0	0	0	0	2	0	1	0	1	0	1	1	3	0	0	0	0	0
Rosa omeiensis	Gansu, Lanzhou				13250-15	2	2	1	1	1	1	7	11	55	70	18	16	6	8	6	11	4	5	11	11	7	7	3	3	0	0	0	0	0	0	1	1	0	0	1	0	2	1	3	0	0	0	0	0
Rosa omeiensis	Gansu, Lanzhou				13250-16	2	2	1	1	1	1	9	13	60	85	14	18	6	9	10	13	4	5	4	4	6	6	2	2	0	0	0	0	0	0	3	0	2	0	1	0	3	1	1	1	0	0	0	0
Rosa omeiensis	Gansu, Lanzhou				13250-17	2	2	1	1	1	1	9	13	50	80	9	14	4	6	5	7	3	4	9	10	7	7	2	2	0	0	0	0	0	0	2	0	1	0	1	0	1	1	1	1	1	0	1	0
Rosa omeiensis	Gansu, Lanzhou				13250-18	2	2	1	1	1	1	7	11	60	80	13	16	5	6	9	13	4	5	11	11	7	7	2	2	0	0	0	0	0	0	3	3	1	0	0	0	1	1	0	1	0	0	0	0
Rosa omeiensis	Gansu, Lanzhou				13250-19	2	2	1	1	1	1	9	13	50	70	15	20	5	7	10	9	4	5	6	6	7	7	3	3	0	0	0	0	0	0	3	3	0	0	1	0	2	1	1	0	0	0	0	0
Rosa omeiensis	Gansu, Lanzhou				13250-2	2	2	1	1	1	1	7	11	60	75	11	19	5	7	8	10	4	4	8	8	7	7	2	2	0	0	0	0	0	0	4	4	0	0	1	0	2	1	3	0	0	0	0	0
Rosa omeiensis	Gansu, Lanzhou				13250-20	2	2	1	1	1	1	9	13	50	75	12	15	5	7	8	10	3	4	12	12	6	6	2	2	0	0	0	0	0	0	3	3	1	0	1	0	1	1	0	0	0	0	0	0
Rosa omeiensis	Gansu, Lanzhou				13250-21	2	2	1	1	1	1	9	13	50	70	13	16	5	7	7	11	4	5	7	7	6	6	2	2	0	0	0	0	0	0	3	3	0	0	1	0	1	1	1	0	0	0	0	0
Rosa omeiensis	Gansu, Lanzhou				13250-22	2	2	1	1	1	1	9	11	50	80	12	16	5	7	8	10	3	4	8	8	6	6	2	2	0	0	0	0	0	0	3	2	1	0	0	0	1	1	1	0	0	0	0	0
Rosa omeiensis	Gansu, Lanzhou				13250-23	2	2	1	1	1	1	7	9	50	65	15	16	6	9	7	11	5	6	11	11	8	8	3	3	0	0	0	0	0	0	4	2	0	0	1	0	1	1	1	0	0	0	0	0
Rosa omeiensis	Gansu, Lanzhou				13250-24	2	2	1	1	1	1	9	13	60	100	16	22	5	6	8	12	4	5	7	7	9	9	2	2	0	0	0	0	0	0	4	3	0	0	1	0	1	1	0	0	0	0	0	0
Rosa omeiensis	Gansu, Lanzhou				13250-25	2	2	1	1	1	1	9	11	55	70	12	17	5	7	6	8	4	4	10	10	6	6	2	2	0	0	0	0	0	0	2	1	1	0	0	0	1	1	2	0	0	0	0	0
Rosa omeiensis	Gansu, Lanzhou				13250-3	2	2	1	1	1	1	9	11	50	80	15	19	5	7	7	12	4	4	7	7	7	7	2	2	0	0	0	0	0	0	4	3	0	0	1	0	1	1	1	1	0	0	0	0
Rosa omeiensis	Gansu, Lanzhou				13250-4	2	2	1	1	1	1	7	11	60	75	12	17	5	7	7	10	4	5	8	8	5	5	2	2	0	0	0	0	0	0	4	3	1	0	1	0	2	1	1	1	0	0	1	0
Rosa omeiensis	Gansu, Lanzhou				13250-5	2	2	1	1	1	1	9	11	55	65	13	17	5	7	7	8	3	4	7	7	7	7	2	2	0	0	0	0	0	0	3	3	0	0	1	0	2	1	2	0	0	0	0	0
Rosa omeiensis	Gansu, Lanzhou				13250-6	2	2	1	1	1	1	9	13	50	60	12	17	5	6	6	8	4	4	7	7	6	6	2	2	0	0	0	0	0	0	4	3	0	0	1	0	2	1	3	0	1	0	1	0
Rosa omeiensis	Gansu, Lanzhou				13250-7	2	2	1	1	1	1	9	15	60	75	14	18	5	7	6	11	3	4	10	10	7	7	2	2	0	0	0	0	0	0	3	2	0	0	1	0	3	1	1	1	0	0	0	0
Rosa omeiensis	Gansu, Lanzhou				13250-8	2	2	1	1	1	1	9	13	70	85	14	20	5	7	6	8	4	4	9	9	6	6	2	2	0	0	0	0	0	0	3	2	1	0	1	0	1	1	2	0	0	0	0	0
Rosa omeiensis	Gansu, Lanzhou				13250-9	2	2	1	1	1	1	9	13	60	80	12	17	5	8	7	10	4	5	8	8	8	8	2	2	0	0	0	0	0	0	4	3	0	0	1	0	2	1	1	0	0	0	0	0
Rosa omeiensis	Gansu, Dingxi	35.57906	104.0568	2600	13259-1	2	2	1	1	1	1	9	13	50	70	11	17	5	6	8	11	4	4	9	11	7	7	3	3	0	0	0	0	1	0	3	0	0	0	1	0	3	1	3	0	0	0	0	0
Rosa omeiensis	Gansu, Dingxi				13259-2	2	2	1	1	1	1	11	15	65	75	14	19	5	7	6	9	4	5	8	8	8	8	3	3	0	0	0	0	0	0	3	2	1	0	1	0	1	1	1	1	0	0	0	0
Rosa omeiensis	Gansu, Dingxi				13259-3	2	2	1	1	1	1	9	13	50	70	13	21	5	6	7	10	3	4	8	8	6	6	2	2	0	0	0	0	0	0	0	0	2	0	3	0	3	1	3	0	0	0	0	0
Rosa omeiensis	Gansu, Dingxi				13259-4	2	2	1	1	1	1	9	13	65	90	14	21	5	7	6	8	4	4	10	18	9	9	3	3	0	0	0	0	0	0	3	0	0	0	1	0	3	1	1	1	0	0	0	0
Rosa omeiensis	Gansu, Dingxi				13259-5	2	2	1	1	1	1	9	13	50	80	12	15	4	6	6	8	3	4	10	10	7	7	2	2	0	0	0	0	0	0	3	2	0	0	1	0	3	1	1	1	0	0	0	0
Rosa omeiensis	Gansu, Dingxi				13259-6	2	2	1	1	1	1	9	15	60	70	12	16	5	7	8	12	4	5	9	9	7	7	3	3	0	0	0	0	0	0	3	2	1	0	1	0	3	1	1	1	0	0	0	0
Rosa omeiensis	Gansu, Dingxi				13259-7	2	2	1	1	1	1	9	11	25	35	8	10	3	4	6	7	2	3	6	6	6	6	2	2	0	0	0	0	1	0	0	0	3	0	3	0	4	1	3	0	0	0	0	0
Rosa omeiensis	Gansu, Dingxi				13259-8	2	2	1	1	1	1	11	13	60	70	12	17	5	7	6	8	3	4	10	10	7	7	2	2	0	0	0	0	0	0	3	0	1	0	1	0	1	1	3	0	0	0	0	0
Rosa omeiensis	Gansu, Dingxi				13259-9	2	2	1	1	1	1	9	13	60	80	12	17	5	6	7	12	3	4	14	14	7	7	3	3	0	0	0	0	0	0	3	3	0	0	1	0	1	1	1	1	0	0	0	0
Rosa omeiensis	Yunnan, Shangri-la	28.34458	99.50008	4250	13407-10	2	2	1	1	1	0	9	15	50	85	12	19	5	6.5	7	11	3	5	15	20	8	9	4	4	0	0	0	0	0	0	0	0	0	0	1	0	0	1	1	0	0	0	0	0
Rosa omeiensis	Yunnan, Shangri-la				13407-12	2	2	1	1	1	0	9	13	50	80	12	17	5.5	7	7	15	4	6	16	20	8	9	4	4.5	0	0	0	0	0	0	0	0	1	0	1	0	0	1	1	0	0	0	0	0
Rosa omeiensis	Yunnan, Shangri-la				13407-2	2	2	1	1	1	1	9	13	35	45	10	14	4	4.5	5	7	3	3.5	13	15	9	10	4	4	0	0	0	0	0	0	0	0	0	0	0	0	1	1	1	0	0	0	0	0
Rosa omeiensis	Yunnan, Shangri-la				13407-23	2	2	1	1	1	1	9	13	35	50	9	13	4.5	5.5	5	8	2.5	4	6	12	8	9	3	3.5	0	0	0	0	0	0	0	0	1	0	2	0	2	1	1	0	0	0	0	0
Rosa omeiensis	Yunnan, Shangri-la				13407-5	2	2	1	1	1	1	9	13	45	70	12	19	5	6.5	5	9	3	4	16	18	10	11	3.5	3.5	0	0	0	0	0	0	0	0	1	0	1	0	1	1	2	0	0	0	0	0
Rosa omeiensis	Yunnan, Shangri-la				13407-8	2	2	1	1	1	1	9	15	45	75	13	19	6	8	6	11	3.5	4.5	17	20	10	11	3.5	4	0	0	0	0	0	0	0	0	0	0	1	0	1	1	2	0	0	0	0	0
Rosa omeiensis	Yunnan, Shangri-la				13407-1	2	2	1	1	1	1	9	13	25	70	8	15	3.5	6	6	11	3	4	9	13	8	11	3	4	0	0	0	0	1	0	0	0	1	0	1	0	1	1	2	0	0	0	0	0
Rosa omeiensis	Yunnan, Shangri-la				13407-3	2	2	1	1	1	1	9	13	30	60	9	15	4	6.5	4	7	3	4.5	13	15	7	8	2.5	3	0	0	0	0	1	0	1	0	0	0	1	0	1	1	2	0	0	0	0	0
Rosa omeiensis	Yunnan, Shangri-la				13407-4	2	2	1	1	1	1	9	13	28	55	8	16	4	6	4	9	2.5	4	16	17	7	8	3.8	4	0	0	0	0	1	0	0	0	1	0	2	0	2	1	2	0	0	0	0	0
Rosa omeiensis	Yunnan, Shangri-la				13407-6	2	2	1	1	1	1	9	13	30	65	8	19	4	7	6	10	3.5	6	16	19	9	12	3	3.5	0	0	0	0	1	0	0	0	1	0	1	0	0	1	1	0	0	0	0	0
Rosa omeiensis	Yunnan, Shangri-la				13407-7	2	2	1	1	1	1	9	13	30	70	9	17	5	6	4	8	2.5	4	16	18	11	12	3.5	4	0	0	0	0	0	0	0	0	1	0	1	0	0	1	2	0	0	0	0	0
Rosa omeiensis	Yunnan, Shangri-la				13407-8	2	2	1	1	1	1	9	15	30	85	10	20	5	8	6	12	3	4.5	21	22	10	12	3.5	4	0	0	0	0	1	0	0	0	0	0	0	0	0	1	1	0	0	0	0	0
Rosa omeiensis	Yunnan, Shangri-la				13407-9	2	2	1	1	1	1	11	13	35	52	10	13	3.5	5	6	10	2.5	3.5	13	16	7	9	3	3.2	0	0	0	0	0	0	0	0	0	0	1	0	0	1	2	0	0	0	0	0
Rosa omeiensis	Yunnan, Shangri-la				13407-11	2	2	1	1	1	1	7	13	25	63	11	19	5	8.5	6	11	3	5	12	17	10	11	3.8	4	0	0	0	0	1	0	0	0	0	0	1	0	2	1	1	0	0	0	0	0
Rosa omeiensis	Yunnan, Shangri-la				13407-13	2	2	1	1	1	1	9	13	45	77	12	20	5	7.5	5	8	3	4	16	25	8	10	3.5	3.8	0	0	0	0	0	0	1	0	1	0	0	0	2	1	1	0	0	0	0	0
Rosa omeiensis	Yunnan, Shangri-la				13407-14	2	2	1	1	1	1	9	13	33	70	8	14	4	6	6	9	3	4	16	18	8	10	2.8	3.3	0	0	0	0	1	0	1	0	1	0	1	0	1	1	1	1	0	0	0	0
Rosa omeiensis	Yunnan, Shangri-la				13407-15	2	2	1	1	1	1	9	15	32	82	10	17	3.5	6	6	10	3	4	19	21	8	10	3.5	4	0	0	0	0	1	0	0	0	1	0	1	0	1	1	1	0	0	0	0	0
Rosa omeiensis	Yunnan, Shangri-la				13407-16	2	2	1	1	1	1	9	13	28	55	8	16	4	6	4	9	2.5	4	16	17	7	8	3.8	4	0	0	0	0	0	0	0	0	0	0	0	0	0	1	1	0	0	0	0	0
Rosa omeiensis	Yunnan, Dêqên	28.20123	99.5514	4180	13442-1	2	2	1	1	1	0	9	13	30	65	8	19	4	7	6	10	3.5	6	16	19	9	12	3	3.5	0	0	0	0	0	0	0	0	1	0	1	0	0	1	1	0	0	0	0	0
Rosa omeiensis	Yunnan, Dêqên				13442-2	2	2	1	1	1	1	9	13	30	70	9	17	5	6	4	8	2.5	4	16	18	11	12	3.5	4	0	0	0	0	0	0	0	0	0	0	0	0	1	1	1	0	0	0	0	0
Rosa omeiensis	Yunnan, Dêqên				13442-3	2	2	1	1	1	1	9	15	30	85	10	20	5	8	6	12	3	4.5	21	22	10	12	3.5	4	0	0	0	0	0	0	0	0	1	0	2	0	2	1	1	0	0	0	0	0
Rosa omeiensis	Yunnan, Dêqên				13442-4	2	2	1	1	1	1	11	13	35	52	10	13	3.5	5	6	10	2.5	3.5	13	16	7	9	3	3.2	0	0	0	0	0	0	0	0	1	0	1	0	1	1	2	0	0	0	0	0
Rosa omeiensis	Yunnan, Dêqên				13442-5	2	2	1	1	1	1	9	13	40	60	9	11	5	6	5	8	3	4	18	19	11	12	3	3.5	0	0	0	0	0	0	0	0	0	0	1	0	1	1	2	0	0	0	0	0
Rosa sericea	Tibet, Nagqu	31.11892	94.2563	3960	15366-2	2	2	1	1	1	1	9	13	30	40	8	11	4.5	5.5	4	7	3	4	19	21	11	12	3	3.5	0	0	0	0	0	0	0	0	0	0	1	0	0	1	0	1	0	0	0	0
Rosa sericea	Tibet, Nagqu				15366-3	2	2	1	1	1	1	9	13	35	55	9	13	6	7	5	8	3.5	4.5	22	27	10	11	2.5	3	0	0	0	0	0	0	0	0	0	0	1	0	1	1	0	1	0	0	0	0
Rosa sericea	Tibet, Nagqu				15366-4	2	2	1	1	1	1	9	13	40	55	10	11	4.5	5.5	5	9	3	4	10	15	10	12	2.5	3	0	0	0	2	0	0	0	0	0	0	1	1	0	1	0	1	0	0	0	0
Rosa sericea	Tibet, Nagqu				15366-5	2	2	1	1	1	1	9	15	35	60	11	14	6	7	6	8	4	5	16	19	8	9	3	3.5	0	0	0	0	0	0	0	0	1	0	2	0	0	1	0	2	0	0	0	0
Rosa sericea	Tibet, Nagqu				15366-6	2	2	1	1	1	1	9	15	23	45	7	10	4.5	6.5	5	8	3	5	19	22	9	12	3.2	3.7	0	0	0	0	0	0	0	0	0	0	1	1	0	1	1	1	0	0	0	0
Rosa sericea	Tibet, Nagqu				15366-7	2	2	1	1	1	1	9	11	27	50	8	12	5	9	4	8	4	5	14	20	8	10	4	4.5	0	0	0	0	0	0	0	0	0	0	1	2	0	1	1	1	0	0	0	0
Rosa sericea	Tibet, Nagqu				15366-8	2	2	1	1	1	1	9	13	25	45	7	11	3.5	6.5	4	7	3	4	16	22	9	11	2.7	3	0	0	0	0	0	0	0	0	0	0	1	0	0	1	1	1	0	0	0	0
Rosa sericea	Tibet, Nagqu				15366-9	2	2	1	1	1	1	9	15	23	60	8	13	4.5	7	5	8	3	4.5	12	32	9	15	2.5	3.2	0	0	0	0	0	0	0	0	0	0	1	2	0	1	2	1	0	0	0	0
Rosa sericea	Tibet, Nagqu				15366-10	2	2	1	1	1	1	5	13	25	50	9	14	4.5	6.5	5	12	2.5	6	14	22	11	13	3.5	3.7	0	0	0	2	0	1	0	0	0	0	1	3	0	2	1	2	0	0	0	0
Rosa sericea	Tibet, Nagqu				15366-11	2	2	1	1	1	1	9	13	30	57	10	15	4.5	8	5	11	3	5	14	30	13	15	4	4.2	0	0	0	2	0	0	0	0	0	0	1	2	0	1	0	1	0	0	0	0
Rosa sericea	Tibet, Nagqu				15366-12	2	2	1	1	1	1	9	15	35	50	7	10	5	6.5	4	6	3.5	4.5	14	25	8	11	2.5	3	0	0	0	0	0	0	0	0	0	0	1	0	0	1	1	1	0	0	0	0
Rosa sericea	Tibet, Nagqu				15366-13	2	2	1	1	1	1	7	11	25	60	8	14	4.5	8	5	8	2.5	5.5	16	23	8	13	3.2	3.8	0	0	0	2	0	1	0	0	0	0	1	1	0	1	1	1	0	0	0	0
Rosa sericea	Tibet, Nagqu				15366-14	2	2	1	1	1	1	9	13	33	75	8	16	5	7.5	5	8	3	5	12	22	9	11	3.2	3.5	0	0	0	2	0	1	0	0	0	0	1	1	0	1	0	1	0	0	0	0
Rosa sericea	Tibet, Nagqu				15366-15	2	2	1	1	1	1	9	13	18	40	5	7	4	4.5	3	5	2	3	11	18	11	13	2	2.8	0	0	0	0	0	0	0	0	0	0	0	0	0	1	0	1	0	0	0	0
Rosa sericea	Tibet, Nagqu				15366-16	2	2	1	1	1	1	9	13	40	67	10	15	5	7.5	5	12	3	6	23	24	12	14	3	3.2	0	0	0	2	0	1	0	0	0	0	1	2	0	1	0	1	0	0	0	0
Rosa sericea	Tibet, Nagqu				15366-17	2	2	1	1	1	1	7	11	25	55	10	13	4	6	6	9	3	4	14	23	11	13	2	2.2	0	0	0	0	0	0	0	0	0	0	0	0	0	1	0	1	0	0	0	0
Rosa sericea	Tibet, Nagqu				15366-18	2	2	1	1	1	1	9	13	25	62	11	16	6	10	5	10	3	5	8	20	12	15	3.5	6	0	0	0	2	0	0	0	0	0	0	1	2	0	1	1	2	0	0	0	0
Rosa sericea	Tibet, Nagqu				15366-19	2	2	1	1	1	1	9	13	20	40	7	11	3.5	6	3	6	2	3	18	23	11	15	2.5	3.5	0	0	0	2	0	0	0	0	2	0	1	3	1	3	2	3	0	0	0	0
Rosa sericea	Tibet, Nagqu				15366-20	2	2	1	1	1	1	7	11	40	80	10	17	6	8	6	9	4	5	8	13	6	6	2	2	0	0	0	2	0	1	0	0	0	0	0	0	0	1	0	2	0	0	0	0
Rosa omeiensis	Qinghai, Xining	36.59186	101.44413	2500	15470-1	2	2	1	1	1	0	9	11	40	70	10	15	5	6	4	7	3	4	10	11	6	6	2	2	0	0	0	0	0	0	2	0	0	0	1	0	1	1	1	1	0	0	0	0
Rosa omeiensis	Qinghai, Xining				15470-10	2	2	1	1	1	0	9	11	40	55	9	11	4.5	5	5	6	3	4	5	10	7	7	2	2	0	0	0	0	0	0	1	0	0	0	0	0	0	1	1	1	0	0	0	0
Rosa omeiensis	Qinghai, Xining				15470-11	2	2	1	1	1	1	7	11	40	80	10	17	5	6	5	7	3.5	4	6	7	6	6	2	2	0	0	0	0	0	0	1	0	0	0	0	0	0	0	0	1	0	0	0	0
Rosa omeiensis	Qinghai, Xining				15470-12	2	2	1	1	1	1	9	13	40	60	10	15	4	5	5	7	3.5	4	5	10	8	8	2	2	0	0	0	0	0	0	2	1	0	0	0	0	0	1	1	1	2	0	2	0
Rosa omeiensis	Qinghai, Xining				15470-13	2	2	1	1	1	1	7	11	40	75	10	16	5	7	5	7	3	4.5	10	13	7	7	2.5	2.5	0	0	0	0	0	0	1	0	0	0	0	0	1	1	1	1	0	0	0	0
Rosa omeiensis	Qinghai, Xining				15470-14	2	2	1	1	1	1	7	13	40	60	9	14	5	7	5	9	4	5	7	12	7	7	2.5	2.5	0	0	0	0	0	0	1	0	0	0	1	0	1	1	0	1	1	0	1	0
Rosa omeiensis	Qinghai, Xining				15470-15	2	2	1	1	1	1	9	13	50	65	10	15	5	6	6	10	3.5	4.5	11	11	7	7	2.5	2.5	0	0	0	0	0	0	1	0	0	0	1	0	1	1	1	1	0	0	0	0
Rosa omeiensis	Qinghai, Xining				15470-16	2	2	1	1	1	1	9	11	40	65	9	15	4	6	6	8	3	4	5	7	7	7	2.5	2.5	0	0	0	0	0	0	1	1	0	0	1	0	0	1	0	1	0	0	0	0
Rosa omeiensis	Qinghai, Xining				15470-17	2	2	1	1	1	1	11	13	50	60	9	12	4	6	4	6	3	4	7	7	6	6	2	2	0	0	0	0	0	0	1	0	0	0	1	0	1	1	1	0	0	0	0	0
Rosa omeiensis	Qinghai, Xining				15470-18	2	2	1	1	1	1	9	13	45	80	13	20	5	6	5	9	4	5	12	15	8	8	2	2	0	0	0	0	0	0	2	0	0	0	0	0	0	1	0	1	0	0	0	0
Rosa omeiensis	Qinghai, Xining				15470-19	2	2	1	1	1	1	9	13	55	80	12	16	4	6	5	7	3.5	4.5	12	13	8	8	2	2	0	0	0	0	0	0	0	0	0	0	0	0	0	1	0	0	0	0	0	0
Rosa omeiensis	Qinghai, Xining				15470-2	2	2	1	1	1	1	9	11	45	65	8	15	5	6	4	7	3	4	10	12	8	8	2.5	2.5	0	0	0	0	0	0	1	0	0	0	1	0	1	1	1	1	0	0	0	0
Rosa omeiensis	Qinghai, Xining				15470-20	2	2	1	1	1	1	7	13	55	75	12	15	5.5	7	5	8	4.5	6	11	20	9	9	2	3	0	0	0	0	0	0	1	0	0	0	0	0	0	1	0	0	0	0	0	0
Rosa omeiensis	Qinghai, Xining				15470-21	2	2	1	1	1	1	7	11	50	70	12	17	6	10	7	10	5	6	6	6	7	7	2	2	0	0	0	0	0	0	2	1	0	0	0	0	0	1	0	0	0	0	0	0
Rosa omeiensis	Qinghai, Xining				15470-22	2	2	1	1	1	1	9	13	50	65	12	16	4	5	4	8	3	4	10	7	8	8	2	2	0	0	0	0	0	0	2	1	0	0	0	0	0	1	0	0	0	0	0	0
Rosa omeiensis	Qinghai, Xining				15470-3	2	2	1	1	1	1	9	13	40	65	10	14	5	6	5	7	3	4	10	14	6	6	2	2	0	0	0	0	0	0	1	0	0	0	0	0	0	1	0	1	0	0	0	0
Rosa omeiensis	Qinghai, Xining				15470-4	2	2	1	1	1	1	9	13	50	75	10	19	4	7	6	10	4	4.5	6	8	8	8	2	2	0	0	0	0	0	0	2	0	0	0	1	0	0	1	1	1	0	0	0	0
Rosa omeiensis	Qinghai, Xining				15470-5	2	2	1	1	1	1	7	13	30	75	10	17	4	6	6	9	4	4.5	10	12	6	6	2	2	0	0	0	0	0	0	1	0	0	0	1	0	1	1	1	1	0	0	0	0
Rosa omeiensis	Qinghai, Xining				15470-6	2	2	1	1	1	1	9	13	60	80	13	18	5	7	6	10	4	5	10	11	6	6	2	2	0	0	0	0	0	0	1	0	0	0	0	0	0	1	0	1	0	0	0	0
Rosa omeiensis	Qinghai, Xining				15470-7	2	2	1	1	1	1	7	11	40	60	9	15	5	6	5	7	3	4	6	8	7	7	2	2	0	0	0	0	0	0	1	0	0	0	0	0	0	1	1	1	0	0	0	0
Rosa omeiensis	Qinghai, Haidong	35.49680	102.41725	1950	15500-1	2	2	1	1	1	1	9	13	50	70	11	14	5	5.5	5	6	3	4	7	11	8	8	2	2	0	0	0	0	0	0	0	0	0	0	0	0	0	1	0	0	0	0	0	0
Rosa omeiensis	Qinghai, Haidong				15500-10	2	2	1	1	1	1	9	13	60	75	14	18	6.5	9	7	10	5	6	7	11	8	8	2	2	0	0	0	0	0	0	0	0	0	0	0	0	0	1	0	0	0	0	0	0
Rosa omeiensis	Qinghai, Haidong				15500-11	2	2	1	1	1	1	9	11	45	60	10	13	5	7.5	6	8	4	5	7	7	8	8	2	2	0	0	0	0	0	0	0	0	0	0	0	0	0	1	0	0	0	0	0	0
Rosa omeiensis	Qinghai, Haidong				15500-12	2	2	1	1	1	1	9	13	40	65	9	11	6	7	6	9	4	5.5	12	15	8	8	2	2	0	0	0	0	0	0	0	0	0	0	0	0	0	1	0	0	0	0	0	0
Rosa omeiensis	Qinghai, Haidong				15500-13	2	2	1	1	1	1	9	13	50	75	10	15	6	7.5	6	9	3	5	12	13	8	8	2	2	0	0	0	0	0	0	0	0	0	0	0	0	0	1	0	0	0	0	0	0
Rosa omeiensis	Qinghai, Haidong				15500-14	2	2	1	1	1	1	9	11	40	55	7	11	5	6	4	5	3.5	4	10	12	8	8	2.5	2.5	0	0	0	0	0	0	1	0	0	0	0	0	0	1	0	0	0	0	0	0
Rosa omeiensis	Qinghai, Haidong				15500-15	2	2	1	1	1	1	9	13	55	70	11	16	6	10	5	9	4	5	11	20	9	9	2	3	0	0	0	0	0	0	0	0	0	0	0	0	0	1	0	0	0	0	0	0
Rosa omeiensis	Qinghai, Haidong				15500-16	2	2	1	1	1	1	7	13	55	70	10	13	7	10	5	8	4	5.5	6	6	7	7	2	2	0	0	0	0	0	0	0	0	0	0	0	0	0	1	0	0	0	0	0	0
Rosa omeiensis	Qinghai, Haidong				15500-17	2	2	1	1	1	1	9	11	55	75	11	15	6.5	8	5	9	4.5	5	10	12	8	8	2	2	0	0	0	0	0	0	1	0	0	0	0	0	0	1	0	0	0	0	0	0
Rosa omeiensis	Qinghai, Haidong				15500-18	2	2	1	1	1	1	9	11	40	50	8	10	4	5	4	5	4	4	10	14	6	6	2	2	0	0	0	0	0	0	0	0	0	0	0	0	0	1	0	0	0	0	0	0
Rosa omeiensis	Qinghai, Haidong				15500-19	2	2	1	1	1	1	9	11	40	65	10	14	5	6.5	5	8	3	4.5	6	8	8	8	2	2	0	0	0	0	0	0	0	0	0	0	0	0	0	1	0	0	0	0	0	0
Rosa omeiensis	Qinghai, Haidong				15500-2	2	2	1	1	1	1	9	11	40	65	9	12	5	7	5	7	3	4	8	11	9	10	2	2	0	0	0	0	0	0	0	0	0	0	0	0	0	1	0	0	0	0	0	0
Rosa omeiensis	Qinghai, Haidong				15500-20	2	2	1	1	1	1	7	9	30	40	7	10	4	6	4	6	3	4	8	11	10	10	2	2	0	0	0	0	0	0	1	0	0	0	0	0	0	1	0	0	0	0	0	0
Rosa omeiensis	Qinghai, Haidong				15500-3	2	2	1	1	1	1	9	11	35	45	7	10	4	5.5	4	6	3	5.5	6	6	7	7	2	2	0	0	0	0	0	0	0	0	0	0	0	0	0	1	0	0	0	0	0	0
Rosa omeiensis	Qinghai, Haidong				15500-4	2	2	1	1	1	1	7	11	30	50	7	10	4	6	5	7	4	5	10	12	8	8	2	2	0	0	0	0	0	0	0	0	0	0	0	0	0	1	0	0	0	0	0	0
Rosa omeiensis	Qinghai, Haidong				15500-5	2	2	1	1	1	1	9	11	45	60	10	12	5.5	7	5	8	4	4	10	14	6	6	2	2	0	0	0	0	0	0	0	0	0	0	0	0	0	1	0	0	0	0	0	0
Rosa omeiensis	Qinghai, Haidong				15500-6	2	2	1	1	1	1	9	11	30	45	7	11	5	6	5	6	3	4.5	6	8	8	8	2	2	0	0	0	0	0	0	0	0	0	0	0	0	0	1	0	0	0	0	0	0
Rosa omeiensis	Qinghai, Haidong				15500-7	2	2	1	1	1	1	9	11	35	45	7	10	5	6	5	7	3	4	8	11	9	10	2	2	0	0	0	0	0	0	0	0	0	0	0	0	0	1	0	0	0	0	0	0
Rosa omeiensis	Qinghai, Haidong				15500-8	2	2	1	1	1	1	9	11	45	65	10	12	6	7	5	7	3.5	5	12	14	9	9	2.5	2.5	0	0	0	0	0	0	0	0	0	0	0	0	0	1	0	0	0	0	0	0
Rosa omeiensis	Qinghai, Haidong				15500-9	2	2	1	1	1	1	9	11	40	60	9	12	5	6.5	6	9	3.5	4.5	12	12	10	10	2	2	0	0	0	0	0	0	0	0	0	0	0	0	0	1	0	0	0	0	0	0
Rosa morrisonensis	Taiwan, Hualian	24.141085	121.283714	3180	15625-1	4	0	1	1	1	1	7	11	15	33	5	8	3	4.5	4.5	6	2	3	7	10	8	12	2.5	3	1	1	1	0	1	0	0	0	0	0	1	0	0	0	2	1	0	0	0	0
Rosa morrisonensis	Taiwan, Hualian				15625-2	4	0	1	1	1	1	7	11	23	45	8	11	5	7	5	9	4	5	7	9	10	13	2.5	3	1	1	1	0	1	0	0	0	0	0	1	0	0	0	2	0	0	0	0	0
Rosa morrisonensis	Taiwan, Hualian				15625-3	4	0	1	1	1	1	7	11	28	40	6	11	3.5	6	6	8	3.5	4.5	7	9	8	11	3	3	1	1	1	0	1	0	0	0	0	0	1	0	1	0	2	2	0	0	0	0
Rosa morrisonensis	Taiwan, Hualian				15625-4	4	0	1	1	1	1	7	11	20	40	7	12	4	6	6	9	3	4	7	10	8	12	2	2.5	1	1	1	0	1	0	0	0	0	0	1	0	1	0	2	1	0	0	0	0
Rosa morrisonensis	Taiwan, Hualian				15625-5	4	0	0	1	1	1	7	11	20	35	7	10	3.5	4	4	7	2.5	3	5	7	7	10	2.5	3.5	1	1	1	0	1	0	0	0	0	0	1	0	1	0	2	1	0	0	0	0
Rosa morrisonensis	Taiwan, Hualian				15625-6	4	0	0	1	1	1	7	11	21	38	7	10	3.5	6	5	7	2.5	4	5	7	8	10	2.5	3	1	1	1	0	1	0	0	0	0	0	1	0	1	1	2	1	0	0	0	0
Rosa morrisonensis	Taiwan, Hualian				15625-7	4	0	0	1	1	1	7	9	22	31	6	8	3.5	5	4	7	2.5	3	5	8	8	10	2	3	1	1	1	0	1	0	0	0	0	0	1	0	1	0	2	1	0	0	0	1
Rosa morrisonensis	Taiwan, Hualian				15625-8	4	0	0	1	1	1	7	11	25	42	6	10	4	6.5	5	7	3	4	5	7	8	10	2.5	3	1	1	1	0	1	0	0	0	0	0	1	0	1	1	2	1	0	0	0	0
Rosa morrisonensis	Taiwan, Hualian				15625-9	4	0	0	1	1	1	7	11	30	45	8	12	4	6	6	9	3	5	6	6	14	14	2	3	1	1	1	0	1	0	0	0	0	0	1	0	1	1	3	1	1	0	1	0
Rosa morrisonensis	Taiwan, Hualian				15625-10	4	0	0	1	1	1	7	11	18	27	5	7	2.5	3	4	6	2	2.5	4	7	7	9	2.5	3	1	1	1	0	1	0	0	0	0	0	1	0	1	1	3	1	0	0	0	0
Rosa morrisonensis	Taiwan, Hualian				15625-11	4	0	0	1	1	1	7	9	16	25	5	8	3	4	5	7	2.5	3	4	5	8	9	2.5	3	1	1	1	0	1	0	0	0	0	0	1	0	1	1	3	1	0	0	0	0
Rosa morrisonensis	Taiwan, Hualian				15625-12	4	0	0	1	1	1	7	11	22	30	6	9	3	4	4	5	2	2.5	5	7	9	10	2	3	1	1	1	0	1	0	0	0	0	0	1	0	3	1	2	1	0	0	0	0
Rosa morrisonensis	Taiwan, Hualian				15625-13	4	0	0	1	1	1	7	11	23	45	7	11	3	5.5	4	7	2.5	4	5	6	10	12	2	3	1	1	1	0	1	0	0	0	0	0	1	0	1	1	2	1	0	0	0	0
Rosa morrisonensis	Taiwan, Hualian				15625-14	4	0	1	1	1	1	7	9	19	25	5	9	2.5	5	4	8	2	5	5	5	12	13	2	2.5	1	1	1	0	1	0	0	0	0	0	1	0	1	1	2	1	0	0	0	0
Rosa morrisonensis	Taiwan, Hualian				15625-15	4	0	1	1	1	1	7	11	20	27	6	10	3	5	4	7	2.5	4	5	6	10	12	2	2.5	1	1	1	0	1	0	0	0	0	0	1	0	1	1	3	1	0	0	0	0
Rosa morrisonensis	Taiwan, Hualian				15625-16	4	0	1	1	1	1	7	11	20	30	5	8	3	4	5	7	2	3	4	5	9	11	2	2.5	1	1	1	0	1	0	0	0	0	0	1	0	2	1	3	1	0	0	0	0
Rosa morrisonensis	Taiwan, Hualian				15625-17	4	0	1	1	1	1	7	11	23	33	6	10	3	5	5	8	2.5	3	6	8	7	11	2	3	1	1	1	0	1	0	0	0	0	0	1	0	2	1	2	3	0	0	0	0
Rosa morrisonensis	Taiwan, Hualian				15625-18	4	0	1	1	1	1	7	9	12	24	5	7	3.5	4.5	5	6	2.5	3	4	5	7	8	2	2.5	1	1	1	0	1	0	0	0	0	0	1	0	1	1	3	1	0	0	0	0
Rosa morrisonensis	Taiwan, Hualian				15625-19	4	0	0	1	1	1	7	11	20	30	5	8	3	5	4	5	2	3	4	5	8	10	2	2.5	1	1	1	0	1	0	0	0	0	0	1	0	3	1	3	1	0	0	0	0
Rosa morrisonensis	Taiwan, Hualian				15625-20	4	0	0	1	1	1	7	9	20	35	6	10	3.5	7	5	8	3	5.5	4	5	8	10	2	2.5	1	1	1	0	1	0	0	0	0	0	1	0	1	1	1	1	0	0	0	0
Rosa morrisonensis	Taiwan, Hualian				15625-21	4	0	0	1	1	1	7	9	25	42	7	10	3.5	5.5	4	7	2.5	4	4	5	8	10	2	2.5	1	1	1	0	1	0	0	0	0	0	1	0	1	1	1	1	0	0	0	0
Rosa sericea	Guizhou, Bijie	27.65232	105.380261	1645	17006-1	1	1	1	1	1	1	9	13	30	40	9	13	4	5	3	6	2	2.5	8	12	10	11	2	2	0	0	0	0	1	0	1	0	0	0	1	0	1	0	1	0	0	0	0	0
Rosa sericea	Guizhou, Bijie	27.652384	105.380372	1651	17006-2	1	1	1	1	1	1	9	11	25	35	9	11	4	5	3	5	2	2.5	5	7	8	9	2	2	0	0	0	0	1	0	1	0	0	0	4	0	2	0	4	0	0	0	0	0
Rosa sericea	Guizhou, Bijie	27.652525	105.380509	1656	17006-3	1	1	1	1	1	1	7	9	20	35	9	12	3	4	4	7	2	2.5	5	6	9	10	2	2	0	0	0	0	1	0	1	0	0	0	1	0	1	0	2	1	0	0	0	0
Rosa sericea	Guizhou, Bijie	27.652591	105.380476	1639	17006-4	1	1	1	1	1	1	7	11	20	30	6	9	3	4.5	3	5	2	2.5	5	6	5	6	2	2	0	0	0	0	1	0	0	0	0	0	3	0	1	0	4	0	0	0	0	0
Rosa sericea	Guizhou, Bijie	27.652699	105.380273	1645	17006-5	1	1	1	1	1	1	9	13	25	40	8	13	3.5	5	3	5	2	2.5	8	9	7	8	2	2	0	0	0	0	1	0	0	0	0	0	3	0	1	0	4	0	0	0	0	0
Rosa sericea	Guizhou, Bijie	27.652089	105.38235	1648	17006-6	1	1	1	1	1	1	7	11	18	35	6	10	3	4	3	5	1.5	2.5	5	6	7	9	2	2.5	0	0	0	0	1	0	0	0	0	0	4	0	2	0	4	0	0	0	0	0
Rosa sericea	Guizhou, Bijie	27.650737	105.384087	1667	17006-7	1	1	1	1	1	1	9	13	30	55	9	15	3.5	5	4	6	2	2.5	2	5	9	10	2.2	2.5	0	0	0	0	1	0	0	0	0	0	3	0	1	0	3	0	0	0	0	0
Rosa sericea	Guizhou, Bijie	27.650676	105.384285	1672	17006-8	1	1	1	1	1	1	9	15	30	40	9	14	3.5	5	4	6	2	3	9	11	8	9	2.5	2.8	0	0	0	0	1	0	0	0	0	0	2	0	1	0	1	0	0	0	0	0
Rosa sericea	Guizhou, Bijie	27.65118	105.380043	1645	17006-9	1	1	1	1	1	1	7	13	20	35	8	10	2.5	3	4	7	2.5	3	5	6	8	9	2.5	2.7	0	0	0	0	1	0	0	0	0	0	4	0	1	0	4	0	0	0	0	0
Rosa sericea	Guizhou, Bijie	27.651224	105.379607	1648	17006-10	1	1	1	1	1	1	9	13	25	40	8	11	3	3.8	4	6	2	2.5	3	5	7	9	2.6	3	0	0	0	0	1	0	0	0	0	0	3	0	1	0	4	0	0	0	0	0
Rosa sericea	Guizhou, Bijie	27.650873	105.379998	1659	17006-11	1	1	1	1	1	1	9	13	30	45	8	11	3.5	5	3	5	2	2.5	11	13	9	10	2.5	2.5	0	0	0	0	1	0	0	0	0	0	3	0	2	0	4	0	0	0	0	0
Rosa sericea	Guizhou, Bijie	27.650662	105.379799	1664	17006-12	1	1	1	1	1	1	7	11	20	30	9	12	3.5	4	4	6	2	2.5	9	10	6	7	2	2	0	0	0	0	1	0	0	0	0	0	2	0	2	0	4	0	0	0	0	0
Rosa omeiensis	Tibet, ChangDu	30.4127	97.1608	3600	12543-1	2	2	1	1	1	0	7	11	40	60	11	14	5	7	6	8	3.5	4.5	11	15	13	14	3	3.5	0	0	0	0	0	0	0	0	0	0	0	0	0	1	0	0	0	0	0	0
Rosa omeiensis	Tibet, ChangDu				12543-2	2	2	1	1	1	1	7	9	35	60	10	14	4.5	6	6	8	3.5	4	7	9	10	11	3	3.5	0	0	0	0	0	0	0	0	0	0	0	0	0	1	1	0	0	0	0	0
Rosa omeiensis	Tibet, ChangDu				12543-3	2	2	1	1	1	1	7	9	25	40	10	11	5	5.5	5	7	3.5	4	11	13	9	10	3	3	0	0	0	0	0	0	0	0	0	0	0	0	0	1	1	1	0	0	0	0
Rosa omeiensis	Tibet, ChangDu				12543-5	2	2	1	1	1	1	7	11	45	70	9	12	4	7	5	7	4.5	6	9	12	12	13	3	3.5	0	0	0	0	0	0	1	0	0	0	0	0	0	1	0	0	0	0	0	0
Rosa omeiensis	Tibet, ChangDu				12543-6	2	2	1	1	1	1	7	11	40	55	9	12	5	6	4	8	3	4.5	14	15	11	13	3	3.5	0	0	0	0	0	0	1	0	0	0	0	0	0	1	0	0	0	0	0	0
Rosa omeiensis	Tibet, ChangDu				12543-4	2	2	1	1	1	1	11	13	50	60	13	15	7	7.5	7	10	3	5	14	15	11	13	3	3.5	0	0	0	0	0	0	0	0	0	0	0	0	0	1	0	1	0	0	0	0
Rosa omeiensis	Tibet, ChangDu				12543-7	2	2	1	1	1	1	7	11	25	50	8	12	5	7	5	7	3	4.5	6	8	9	12	2.5	3.5	0	0	0	2	0	0	0	0	0	0	1	1	0	3	0	1	0	0	0	0
Rosa omeiensis	Tibet, ChangDu				12543-8	2	2	1	1	1	1	7	11	25	45	8	11	4.5	6	5	9	3	5	12	16	12	14	4	4.5	0	0	0	0	0	0	0	0	0	0	0	0	0	1	0	1	0	0	0	0
Rosa omeiensis	Tibet, ChangDu				12543-9	2	2	1	1	1	1	7	11	25	35	7	9	3.5	4	3	5	2.5	3	9	16	9	13	2	2.5	0	0	0	0	0	0	0	0	0	0	1	0	0	4	2	1	0	0	0	0
Rosa omeiensis	Tibet, ChangDu				12543-10	2	2	1	1	1	1	7	11	25	50	8	13	4	6	5	9	3	4	13	15	12	14	3.2	3.8	0	0	0	0	0	0	0	0	0	0	0	0	0	1	0	0	0	0	0	0
Rosa omeiensis	Tibet, ChangDu				12543-11	2	2	1	1	1	1	7	11	35	70	10	16	5	6	5	13	3	5.5	9	11	11	14	4	4.5	0	0	0	0	0	0	0	0	0	0	0	0	0	1	0	0	0	0	0	0
Rosa omeiensis	Tibet, ChangDu				12543-12	2	2	1	1	1	1	7	9	20	45	6	9	4	5	3	5	2	3	9	13	6	8	2	2.5	0	0	0	0	0	0	0	0	0	0	0	0	0	1	0	0	0	0	0	0
Rosa omeiensis	Tibet, ChangDu				12543-13	2	2	1	1	1	1	7	11	28	55	7	12	4	6.5	5	9	3	4	12	14	11	13	3.5	4	0	0	0	0	0	0	0	0	0	0	0	0	0	3	1	1	0	0	0	0
Rosa omeiensis	Tibet, ChangDu				12543-14	2	2	1	1	1	1	7	11	35	50	10	13	6	8.5	8	11	5	6	10	12	11	13	3	3.5	0	0	0	0	0	0	0	0	0	0	0	0	0	1	0	1	0	0	0	0
Rosa omeiensis	Tibet, ChangDu				12543-15	2	2	1	1	1	1	7	11	20	37	8	12	4	6	6	9	3	4	8	11	9	11	3	3.5	0	0	0	0	0	0	0	0	0	0	1	0	1	1	2	1	0	0	0	0
Rosa omeiensis	Tibet, ChangDu				12543-16	2	2	1	1	1	1	7	11	30	60	8	12	5	6	4	9	2.5	4	7	9	9	11	3.5	3.8	0	0	0	0	0	0	0	0	0	0	1	0	0	2	2	1	0	0	0	0
Rosa omeiensis	Tibet, ChangDu				12543-17	2	2	1	1	1	1	7	11	25	60	10	19	5.5	8.5	6	11	4	5	15	17	16	18	2.5	3	0	0	0	0	0	0	0	0	0	0	1	0	2	1	2	1	0	0	0	0
Rosa omeiensis	Tibet, ChangDu				12543-18	2	2	1	1	1	1	7	9	25	45	8	13	5	8	6	8	4	5	11	12	13	15	3	3.5	0	0	0	0	0	0	0	0	0	0	1	0	0	3	1	1	0	0	0	0
Rosa omeiensis	Tibet, ChangDu				12543-19	2	2	1	1	1	1	7	11	35	70	11	17	8	9.5	9	11	6	7	8	10	10	12	3.8	4	0	0	0	0	0	0	0	0	0	0	1	0	0	1	1	1	0	0	0	0
Rosa omeiensis	Tibet, ChangDu				12543-20	2	2	1	1	1	1	7	11	25	60	8	14	5	9	5	9	3	5	14	15	15	17	4	4.5	0	0	0	0	0	0	0	0	0	0	1	1	0	1	0	1	0	0	0	0
Rosa omeiensis	Tibet, ChangDu				12543-21	2	2	1	1	1	1	7	9	20	50	9	13	4	5	5	7	3	4	14	16	11	13	4	4.5	0	0	0	0	0	0	0	0	0	0	1	0	0	2	2	1	0	0	0	0
Rosa omeiensis	Tibet, ChangDu				12543-22	2	2	1	1	1	1	7	9	25	45	6	11	4	5.5	5	8	3	4	6	10	9	12	2.5	3.5	0	0	0	0	0	0	0	0	0	0	0	0	0	1	0	1	0	0	0	0
Rosa omeiensis	Tibet, ChangDu				12543-23	2	2	1	1	1	1	7	11	25	45	8	11	5	6	5	8	3	4	6	11	12	15	3	3.5	0	0	0	0	0	0	0	0	0	0	2	0	0	1	0	0	0	0	0	0
Rosa omeiensis	Tibet, Yadong	27.578161	89.0254	3800	16639-1	0	1	0	1	1	1	7	11	21	39	8	14	6	8	10	18	5	7.5	9	12	9	10	4	4.5	0	0	1	0	1	0	1	0	0	0	1	0	1	1	1	1	0	0	0	4
Rosa omeiensis	Tibet, Yadong	27.5783	89.0257	3776	16639-2	0	1	0	1	1	1	9	11	34	43	11	13	6	9	7	10	4	5	10	12	8	9	4.5	5	0	0	1	0	1	0	1	0	0	0	1	0	1	0	2	1	0	0	0	4
Rosa omeiensis	Tibet, Yadong	27.5781	89.0251	3768	16639-3	0	1	0	1	1	1	7	11	22	36	9	11	6	8	10	18	5	7.5	9	12	9	10	4	4.5	0	0	1	0	1	0	1	0	0	0	1	0	1	1	1	1	0	0	0	4
Rosa omeiensis	Tibet, Yadong	27.5781	89.0256	3767	16639-4	0	1	0	1	1	1	9	11	29	36	10	13	6	9	7	10	4	5	10	12	8	9	4.5	5	0	0	1	0	1	0	1	0	0	0	1	0	1	0	2	1	0	0	0	4
Rosa omeiensis	Tibet, Yadong	27.5781	89.0256	3767	16639-5	0	1	0	1	1	1	7	11	32	38	7	12	6	8	10	18	5	7.5	9	12	9	10	4	4.5	0	0	1	0	1	0	1	0	0	0	1	0	1	1	1	1	0	0	0	4
Rosa omeiensis	Tibet, Yadong	27.5781	89.0256	3767	16639-6	0	1	0	1	1	1	7	11	35	45	8	10	6	8	10	18	5	7.5	9	12	9	10	4	4.5	0	0	1	0	1	0	1	0	0	0	1	0	1	1	1	1	0	0	0	4
Rosa omeiensis	Tibet, Yadong	27.5781	89.0256	3767	16639-7	0	1	0	1	1	1	9	11	36	47	10	13	6	9	7	10	4	5	10	12	8	9	4.5	5	0	0	1	0	1	0	1	0	0	0	1	0	1	0	2	1	0	0	0	4
Rosa omeiensis	Tibet, Yadong	27.5781	89.0256	3767	16639-8	0	1	0	1	1	1	7	9	29	43	12	15	4	6	7	9	3.5	4	12	13	6	7	2	2.5	0	0	1	0	1	0	1	0	0	0	1	0	0	0	2	0	0	0	0	4
Rosa omeiensis	Tibet, Yadong	27.5781	89.0256	3767	16639-9	0	1	0	1	1	1	7	11	32	37	9	12	5	6	6	10	3	4.5	11	12	6	7	2	2.5	0	0	1	0	1	0	1	0	0	0	1	0	0	0	3	0	0	0	0	4
Rosa zhongdianensis	Yunnan, Diqing	28.0949	99.4817	3007.41	17390—1	0	3	1	1	0	1	5	9	19	32	9	11	7	8	6	13	4	5	8	10	10	12	3	3	0	0	1	1	0	1	1	0	2	0	2	3	0	2	0	4	0	0	0	3
Rosa zhongdianensis	Yunnan, Diqing	28.0948	99.4818	3013.1	17390—2	0	3	1	1	0	1	9	11	24	37	8	12	5.5	7	6	8	4	5	7	11	12	13	3	3	0	0	1	1	0	1	0	0	0	0	1	4	0	4	1	4	0	0	0	3
Rosa zhongdianensis	Yunnan, Diqing	28.0948	99.4818	3006.26	17390—3	0	3	1	1	0	1	7	11	39	53	7	10	6	8	8	11	4.5	5.5	13	14	12	13	3	3	0	0	1	1	0	1	0	0	0	0	1	1	0	1	3	2	0	0	0	3
Rosa zhongdianensis	Yunnan, Diqing	28.078	99.4922	3069.84	17390—4	0	3	1	1	0	1	7	11	27	57	9	11	5	7	5	7	3	4	11	13	9	11	2.5	3	0	0	1	1	0	1	0	0	0	0	1	3	0	2	1	3	0	0	0	3
Rosa zhongdianensis	Yunnan, Diqing	28.0779	99.4923	3067.4	17390—5	0	3	1	1	0	1	9	11	30	52	10	12	6	7	6	9	4	5	10	13	11	12	3	3.5	0	0	1	1	0	1	0	0	1	0	1	2	0	3	2	3	0	0	0	3
Rosa zhongdianensis	Yunnan, Diqing	28.078	99.4922	3061.34	17390—6	0	3	1	1	0	1	9	11	42	55	9	11	6	7	6	9	4	5	12	14	10	11	3.5	3.5	0	0	1	1	0	1	0	0	0	0	2	4	0	4	0	4	0	3	0	3
Rosa zhongdianensis	Yunnan, Diqing	28.0945	99.4826	3011.18	17390—7	0	3	1	1	0	1	9	11	38	58	11	12	6.5	8.5	7	10	4	5	13	15	12	17	3	3	0	0	1	1	0	1	0	0	0	0	1	4	0	4	0	4	0	3	0	3
Rosa zhongdianensis	Yunnan, Diqing	28.0943	99.4828	3010.46	17390—8	0	3	1	1	0	1	9	11	34	50	9	13	5.5	7	6	8	4	5	11	14	13	15	3	3.5	0	0	1	1	0	1	0	0	0	0	2	3	0	3	0	3	0	0	0	3
Rosa zhongdianensis	Yunnan, Diqing	28.0949	99.482	3009.95	17390—9	0	3	1	1	0	1	7	11	27	55	11	14	5.5	8	5	8	3.5	4.5	14	15	13	15	3	3.5	0	0	1	1	0	1	1	0	0	0	1	2	0	1	2	3	0	0	0	3
[truncated: 6 more columns]
